# Supplementary material for: Effects of low-dose hydrocortisone and hydrocortisone plus fludrocortisone in adults with septic shock: a protocol for a systematic review and meta-analysis of individual participant data
Source: PubMed Central journal article supplement — BMJ Open. 2020 Dec 2;10(12):e040931. doi: 10.1136/bmjopen-2020-040931 (PMC7713227; doi:10.1136/bmjopen-2020-040931), 2020-12-02
Supplement: bmjopen-2020-040931.draft_revisions.pdf [file bmjopen-2020-040931.draft_revisions.pdf]

# BMJ Open

BMJ Open is committed to open peer review. As part of this commitment we make the peer review history of every article we publish publicly available.

When an article is published we post the peer reviewers' comments and the authors' responses online. We also post the versions of the paper that were used during peer review. These are the versions that the peer review comments apply to.

The versions of the paper that follow are the versions that were submitted during the peer review process. They are not the versions of record or the final published versions. They should not be cited or distributed as the published version of this manuscript.

BMJ Open is an open access journal and the full, final, typeset and author-corrected version of record of the manuscript is available on our site with no access controls, subscription charges or pay-per-view fees (<http://bmjopen.bmj.com>).

If you have any questions on BMJ Open's open peer review process please email [info.bmjopen@bmj.com](mailto:info.bmjopen@bmj.com)

# BMJ Open

## The effects of low dose hydrocortisone and hydrocortisone plus fludrocortisone in adults with septic shock: a protocol for a systematic review and meta-analysis of individual participant data

|                               |                                                                                                                                                                                                                                                                                                                                                                                                                                                                                                                                                                                                                                                                                                                                                                                                      |
|-------------------------------|------------------------------------------------------------------------------------------------------------------------------------------------------------------------------------------------------------------------------------------------------------------------------------------------------------------------------------------------------------------------------------------------------------------------------------------------------------------------------------------------------------------------------------------------------------------------------------------------------------------------------------------------------------------------------------------------------------------------------------------------------------------------------------------------------|
| Journal:                      | <i>BMJ Open</i>                                                                                                                                                                                                                                                                                                                                                                                                                                                                                                                                                                                                                                                                                                                                                                                      |
| Manuscript ID                 | bmjopen-2020-040931                                                                                                                                                                                                                                                                                                                                                                                                                                                                                                                                                                                                                                                                                                                                                                                  |
| Article Type:                 | Protocol                                                                                                                                                                                                                                                                                                                                                                                                                                                                                                                                                                                                                                                                                                                                                                                             |
| Date Submitted by the Author: | 26-May-2020                                                                                                                                                                                                                                                                                                                                                                                                                                                                                                                                                                                                                                                                                                                                                                                          |
| Complete List of Authors:     | annane, djillali; AP-HP, universit  de Versailles SQY, PIRRACCHIO, Romain; Zuckerberg San Francisco General Hospital and Trauma Center<br>Billot, Laurent; The George Institute for Global Health, Statistics Division<br>Waschka, Andre; University of California Berkeley<br>Chevret, Sylvie; University of Paris<br>Cohen, Jeremy; University of Queensland,<br>Finfer, Simon; The George Institute for Global Health,<br>Gordon, Anthony; Imperial College London, 1. Section of Anaesthetics, Pain Medicine and Intensive Care<br>Hammond, Naomi ; George Institute for Global Health,<br>Myburgh, John; University of New South Wales, St George Clinical School<br>Venkatesh, Balasubramanian; Royal Brisbane and Women' Hospital<br>Delaney, Anthony; The George Institute for Global Health |
| Keywords:                     | Adult intensive & critical care < INTENSIVE & CRITICAL CARE, Clinical trials < THERAPEUTICS, CLINICAL PHARMACOLOGY                                                                                                                                                                                                                                                                                                                                                                                                                                                                                                                                                                                                                                                                                   |
|                               |                                                                                                                                                                                                                                                                                                                                                                                                                                                                                                                                                                                                                                                                                                                                                                                                      |

SCHOLARONE™  
Manuscripts

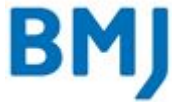

I, the Submitting Author has the right to grant and does grant on behalf of all authors of the Work (as defined in the below author licence), an exclusive licence and/or a non-exclusive licence for contributions from authors who are: i) UK Crown employees; ii) where BMJ has agreed a CC-BY licence shall apply, and/or iii) in accordance with the terms applicable for US Federal Government officers or employees acting as part of their official duties; on a worldwide, perpetual, irrevocable, royalty-free basis to BMJ Publishing Group Ltd ("BMJ") its licensees and where the relevant Journal is co-owned by BMJ to the co-owners of the Journal, to publish the Work in this journal and any other BMJ products and to exploit all rights, as set out in our [licence](#).

The Submitting Author accepts and understands that any supply made under these terms is made by BMJ to the Submitting Author unless you are acting as an employee on behalf of your employer or a postgraduate student of an affiliated institution which is paying any applicable article publishing charge ("APC") for Open Access articles. Where the Submitting Author wishes to make the Work available on an Open Access basis (and intends to pay the relevant APC), the terms of reuse of such Open Access shall be governed by a Creative Commons licence – details of these licences and which [Creative Commons](#) licence will apply to this Work are set out in our licence referred to above.

Other than as permitted in any relevant BMJ Author's Self Archiving Policies, I confirm this Work has not been accepted for publication elsewhere, is not being considered for publication elsewhere and does not duplicate material already published. I confirm all authors consent to publication of this Work and authorise the granting of this licence.

1  
2  
3 **The effects of low dose hydrocortisone and hydrocortisone plus**  
4  
5  
6 **fludrocortisone in adults with septic shock: a protocol for a systematic**  
7  
8 **review and meta-analysis of individual participant data**  
9  
10  
11  
12  
13  
14

15 **Registration:**

16  
17  
18 Prospero registration number CRD42017062198  
19  
20  
21  
22

23 **Authors:**

24  
25  
26  
27 Djillali Annane,<sup>1</sup> Romain Pirracchio,<sup>2</sup> Laurent Billot,<sup>3</sup> Andre Waschka,<sup>4</sup> Sylvie Chevret,<sup>5</sup> Jeremy Cohen,<sup>3,6</sup> Simon  
28 Finfer,<sup>3,7</sup> Anthony Gordon,<sup>8</sup> Naomi Hammond,<sup>3,7</sup> John Myburgh,<sup>3,9</sup> Balasubramanian Venkatesh,<sup>3,10</sup>  
29 Anthony Delaney<sup>3,7</sup> for the **Utility of Steroids in Septic Shock individual Patient Data Meta-Analysis (ULYSSES**  
30 **IPDMA) Collaborators**  
31  
32  
33  
34  
35  
36

37 **Affiliations:**

- 38  
39 1. Department of Critical Care; Raymond Poincaré Hospital (AP-HP)  
40 Laboratory Infection & Inflammation, U1173, Faculty of Health Science Simone Veil, University of  
41 Versailles SQY- University Paris Saclay – INSERM- FHU SEPSIS; RHU RECORDS, France  
42  
43  
44 2. Department of Anesthesia and Perioperative Medicine; Zuckerberg San Francisco General Hospital and  
45 Trauma Center; University of California San Francisco, USA  
46  
47  
48 3. Division of Critical Care, The George Institute for Global Health, University of New South Wales,  
49 Newtown, Sydney, NSW, Australia,  
50  
51  
52 4. **Department of Statistics, UC Berkeley, USA**  
53  
54 5. Department of Bioinformatics and Statistics, hôpital Saint Louis (AP-HP), University of Paris, Paris, France  
55  
56 6. Royal Brisbane and Women' Hospital, Brisbane, Queensland, Australia  
57  
58  
59  
60

- 1
- 2
- 3 7. Malcolm Fisher Department of Intensive Care Medicine, Royal North Shore Hospital, St. Leonards, NSW,
- 4 Australia
- 5
- 6
- 7 8. Division of Anaesthetics, Pain Medicine and Intensive Care, Imperial College London, London UK
- 8
- 9 9. University of New South Wales, St. George Clinical School, Sydney, NSW, Australia
- 10
- 11 10. The Princess Alexandra Hospital, Brisbane, Queensland, Australia
- 12
- 13
- 14
- 15
- 16
- 17

18 The **Utility of Steroids in Septic Shock individual Patient Data Meta-Analysis (ULYSSES IPDMA)** Collaborators are  
19 listed in appendix 1  
20  
21  
22  
23  
24  
25  
26

### 27 **Correspondence :**

28  
29  
30 Djillali Annane

31  
32  
33  
34 104 Boulevard Raymond Poincaré

35  
36 92380 Garches

37  
38 France

39  
40 E-mail: [djillali.annane@aphp.fr](mailto:djillali.annane@aphp.fr)  
41  
42  
43  
44  
45  
46  
47

48 **Word count:** 3994  
49

### 50 **Author contributions:**

51  
52  
53 DA is the guarantor of the study. DA and RP were responsible for the conception of the study. DA and AD made  
54 substantial contributions to the conception and design of the study, drafting of the study protocol, substantial  
55 contributions to the analysis plan, revising the work critically for important intellectual content and providing  
56 approval for the final version to be published. LB and RP made substantial contributions to the trial design and  
57  
58  
59  
60

1  
2  
3 analytical plan, revising the work critically for important intellectual content and provided approval for the final  
4  
5 version to be published. SC, AW, JC, SF, AG, NH, JM and BV made substantial contributions to the drafting of  
6  
7 the study protocol, revised the work critically for important intellectual content and provided approval for the  
8  
9 final version to be published.  
10

### 11 12 13 14 **Ammendments:**

15  
16  
17 Version 1.0 dated 8 April, 2020  
18  
19  
20  
21  
22

### 23 **Funding:**

24  
25  
26 This research is part of FHU SEPSIS and RHU RECORDS, which are funded by the French government through  
27  
28 the Programme d'Investissements d'Avenir, project number ANR-18-RHUS60004. This research received no  
29  
30 specific grant from any agency in the commercial or not-for-profit sectors. The trial is funded by in-kind support  
31  
32 from University of Versailles SQY- University Paris Saclay, the Imperial NIHR Biomedical Research Centre and  
33  
34 the Division of Critical Care, The George Institute for Global Health. Funding sources will have no influence on  
35  
36 data handling or analyses or writing of the manuscript but will be acknowledged in the principal manuscript.  
37  
38  
39  
40  
41  
42  
43  
44  
45  
46  
47  
48  
49  
50  
51  
52  
53  
54  
55  
56  
57  
58  
59  
60

## Abstract

### Introduction

The benefits and risks of low dose hydrocortisone in patients with septic shock have been investigated in numerous randomized controlled trials and trial-level meta-analyses. Yet, the routine use of this treatment remains controversial. To overcome the limitations of previous meta-analyses inherent to the use of aggregate data, we will perform an individual patient data meta-analysis (IPDMA) on the effect of hydrocortisone with or without fludrocortisone compared to placebo or usual care on 90-day mortality and other outcomes in patients with septic shock.

### Methods and analysis

To assess the benefits and risks of hydrocortisone, with or without fludrocortisone for adults with septic shock, we will search five major electronic databases (Cochrane Central Register of Controlled Trials-CENTRAL, MEDLINE, EMBASE and Latin American Caribbean Health Sciences Literature-LILACS), complimented by a search for unpublished trials. The primary analysis will compare hydrocortisone with or without fludrocortisone to placebo or no treatment in adult patients with septic shock. Secondary analyses will compare hydrocortisone to placebo (or usual care), hydrocortisone plus fludrocortisone to placebo (or usual care), and hydrocortisone versus hydrocortisone plus fludrocortisone. The primary outcome will be all cause mortality at 90-day. We will conduct both one-stage IPDMA using mixed-effect models and machine learning with targeted maximum likelihood analyses. We will assess the risk of bias related to unshared data and related to the quality of individual trial.

### Ethics and dissemination

This individual patient data meta-analysis will use existing data from completed randomized clinical trials and will comply with the ethical and regulatory requirements regarding data sharing for each of the component trials. The findings of this study will be submitted for publication in a peer-review journal with straightforward policy for open access.

1  
2  
3  
4  
5  
6 **Key words:**  
7  
8  
9

10 adults – septic shock – corticosteroids - machine learning – individual patient data meta-analysis  
11  
12  
13  
14  
15  
16  
17  
18  
19  
20  
21  
22  
23  
24  
25  
26  
27  
28  
29  
30  
31  
32  
33  
34  
35  
36  
37  
38  
39  
40  
41  
42  
43  
44  
45  
46  
47  
48  
49  
50  
51  
52  
53  
54  
55  
56  
57  
58  
59  
60

For peer review only



## Article Summary

### Strengths and limitations of this study

- This will be the first individual-patient data meta-analysis on the use of hydrocortisone with or without fludrocortisone for septic shock.
- The use of individual patient data will allow estimation of subgroup effects based on patient level covariates.
- The analysis will provide the best assessment of the totality of available evidence on whether hydrocortisone with or without fludrocortisone confers benefits to patients with septic shock and to assess whether there is an optimal regimen for administration.
- The main limitations are regulatory barriers in accessing individual data from original trials, and technical barriers to combining individual patient data from the component trials.

## Introduction

### Rationale

Septic shock is a global health priority.<sup>1</sup> In 2017, there were about 49 million incident cases of sepsis worldwide and 11 million sepsis-related deaths, representing roughly one out of five of all global deaths.<sup>2</sup> There is a need for improved treatments for this unacceptably high mortality rate. The Surviving Sepsis Campaign<sup>3</sup> recommend that, in the first hour of sepsis recognition, physicians obtain blood cultures, administer broad-spectrum antibiotics, start appropriate fluid resuscitation, and begin vasopressors whenever needed. Beyond these core measures, there has been little change in the management of sepsis.

What has changed in recent years, has been the understanding that dysregulation of the host response to infection is key to understanding the pathophysiology of septic shock.<sup>4</sup> This dysregulated host response may be a therapeutic target to improve mortality in patients with septic shock. As early as the 1950s, physicians have used corticosteroids with clinical success in patients with severe infection not responding to antibiotic treatment.<sup>5</sup> Seventy years later, their use in the management of sepsis remains controversial. The fourth revision of the Surviving Sepsis Campaign guidelines suggested against the use of hydrocortisone except in patients poorly responsive to fluids and vasopressors.<sup>3</sup> Since this revision of the guidelines, two major trials have substantially contributed to the understanding of the benefits and risks of corticosteroids for adults with septic shock.<sup>6,7</sup> Both trials used a daily intravenous dose of 200 mg hydrocortisone for seven days without taper-off. The main differences in the trials' design included continuous infusion of hydrocortisone<sup>7</sup> versus intravenous bolus every 6 hours,<sup>6</sup> hydrocortisone alone<sup>7</sup> versus with fludrocortisone,<sup>6</sup> unspecified vasopressor-dependency<sup>7</sup> versus requirement for a minimal dose of  $\geq 0.25 \mu\text{g}/\text{kg}/\text{min}$  or  $\geq 1\text{mg}/\text{h}$  norepinephrine/epinephrine,<sup>6</sup> and unspecified ventilator-dependency<sup>7</sup> versus need for mechanical ventilation.<sup>6</sup> These trials found similar benefits in terms of resolution of shock and organs dysfunction, of accelerating weaning off mechanical ventilation and reducing length of stay in the intensive care unit. They also found no evidence for serious adverse complications with corticosteroids. A mortality benefit with corticosteroids was only reported in APROCCHSS trial<sup>7</sup> but not in ADRENAL.<sup>6</sup>

1  
2  
3 Since 2018, eight trial-level meta-analyses have addressed the effects of corticosteroids in sepsis.<sup>8-15</sup> They have  
4 different designs including differences in trials eligibility criteria, search strategies and in statistical models. The  
5 number of included trials ranged from 14 to 61 and the number of participants ranged from 6,935 to 12,192.  
6  
7 The relative risk (RR) of death in the short-term varied from 0.90 to 0.98, and the upper limit of the 95%  
8 confidence interval varied from 0.98 to 1.08. The magnitude and direction of the pooled RR of dying in the  
9 short-term were consistent across these meta-analyses in favoring corticosteroids but differed mainly by the  
10 presence of some imprecision in the point estimate. More recent meta-analyses found substantial  
11 heterogeneity in the results possibly explained by differences in type of participants (e.g. all ages versus adults  
12 only, all sepsis severity versus only septic shock or community-acquired pneumonia or sepsis and ARDS, and in  
13 treatments administration (hydrocortisone versus synthetic glucocorticoids, low versus high dose, short versus  
14 long course). Intravenous administration of hydrocortisone may be the most frequent prescribed regimen and  
15 people may use this drug in sepsis with or without shock.<sup>16</sup> A noteworthy limitation of these meta-analyses is  
16 the use of aggregate data, limiting the opportunity to harmonize outcome definitions across trials, adjust the  
17 estimated treatment effect on potential confounders and investigate different subgroups.  
18  
19  
20  
21  
22  
23  
24  
25  
26  
27  
28  
29  
30  
31  
32  
33  
34  
35  
36  
37  
38  
39  
40  
41  
42  
43  
44  
45  
46  
47  
48  
49

To address this significant drawback of earlier meta-analyses, we will perform a systematic review and  
individual patient data meta-analysis (IPDMA) from trials to assess the effect of intravenous hydrocortisone  
with or without fludrocortisone, compared to placebo or usual care on 90-day mortality and other outcomes in  
patients with septic shock.

## Objectives

The primary objective of this IPDMA is to assess the effect on 90-day mortality of intravenous hydrocortisone  
therapy, with or without fludrocortisone, compared to placebo or usual care, in adults with septic shock.

Other objectives of this IPDMA include:

- To compare the effect on 90-day mortality of intravenous hydrocortisone therapy with or without  
fludrocortisone, for differing modes of hydrocortisone therapy;
  - Bolus compared to continuous infusion

- Tapered dosing compared to abrupt discontinuation
- Duration of treatment at full dose : fixed duration versus based on vasopressor-dependency
- To compare the effects of intravenous hydrocortisone therapy with or without fludrocortisone in adults with septic shock on secondary outcomes including 28-day and 180-day mortality, requirement for, and duration of organ support, resources utilization as measured by ICU and hospital length of stay, and serious adverse events.
- To compare the effect on 90-day mortality of intravenous hydrocortisone therapy with or without fludrocortisone in adults with septic shock in clinically important subgroups defined by;
  - age
  - sex
  - vasopressor-dependency
  - vasopressin administration
  - predicted mortality
  - SOFA score
  - arterial lactate concentrations and
  - etomidate exposure

## Methods and analysis

This protocol follows the recommendations from the EQUATOR network statement on Preferred Reporting Items for Systematic Reviews and Meta-Analyses Protocols (PRISMA-P)<sup>17</sup> and will allow the report of the completed study to comply with reporting items recommended in the PRISMA of Individual Participant Data (PRISMA IPD).<sup>18</sup>

## Eligibility Criteria

### Types of studies

1  
2  
3 We will consider only randomized trials. We will exclude quasi-randomized trials, trials with a crossover design  
4  
5 or those for which the unit of randomization is not the patient. We will only include trials, which received an  
6  
7 appropriate approval from a research ethics committee and where there was an appropriate method of  
8  
9 obtaining consent.  
10

### 11 12 **Types of participants**

13  
14  
15 We will consider trials that have included adults with sepsis or septic shock as defined in original studies. Trials  
16  
17 of mixed population will be eligible whenever separate information will be available for the subset of patients  
18  
19 with septic shock as defined in original studies. We will exclude trials in children or those performed in patients  
20  
21 without sepsis.  
22  
23

### 24 25 **Types of interventions and controls**

26  
27  
28 We will consider trials in which the experimental intervention was intravenous hydrocortisone at a maximal  
29  
30 daily dose of 400mg for at least 72 hours at full dose, whether given as intermittent bolus or as a continuous  
31  
32 infusion, and whether tapered off or not. We will also consider trials that have investigated the combination of  
33  
34 intravenous hydrocortisone and oral (or enteral) fludrocortisone. We will consider trials in which the  
35  
36 comparator was a placebo, no treatment, or hydrocortisone alone when the experimental intervention was the  
37  
38 combination of hydrocortisone to fludrocortisone. We will also consider trials that compared two doses of  
39  
40 hydrocortisone or bolus versus continuous administration.  
41

42 We will exclude trials that have investigated

- 43  
44 1) corticosteroids other than hydrocortisone or fludrocortisone,
- 45  
46 2) dosage of hydrocortisone higher than 400mg per day,
- 47  
48 3) duration of hydrocortisone of less than 72 hours at full dose,
- 49  
50 4) oral route of hydrocortisone.  
51

52 We will also exclude trials for when we are unable to contact the primary author and/or sponsor or they refuse  
53  
54 to share data. Nevertheless, in case of non-response or refusal, we will use published aggregated data and  
55  
56 combine them to the IPDMA results in a sensitivity analysis, as described in the statistical plan.  
57  
58  
59  
60

## Types of outcome measures

We will only consider trials for inclusion in this review that have information on crude mortality rates at any time point post randomisation.

## Information sources

We will attempt to identify all relevant studies regardless of language or publication status (published, unpublished, in press, in progress). We will use the strategy of the recently completed Cochrane systematic review on the use of corticosteroids in sepsis.<sup>9</sup>

We will search the Cochrane Central Register of Controlled Trials (CENTRAL; 2019 Issue 12) using the search terms 'sepsis', 'septic shock', 'steroids' and 'corticosteroids'. We will also search (up to Dec 2019) MEDLINE, EMBASE and Latin American Caribbean Health Sciences Literature (LILACS) using the topic search terms in combination with the search strategy for identifying trials developed by The Cochrane Collaboration (Appendix 2).<sup>19</sup>

We will check the reference lists of all trials identified by these methods, and we will contact study authors to request individual published or unpublished data. We also will search the proceedings of annual meetings of major critical care medicine symposia, that is, Society of Critical Care Medicine (1998 to 2019), American Thoracic Society (1998 to 2019), International Symposium on Intensive Care and Emergency Medicine (1998 to 2019), American College of Chest Physicians and European Society of Intensive Care Medicine (1998 to 2019).

## Search strategy

The full search strategy is available in Appendix 2

## Study records

## Selection processes and data management

1  
2  
3 We will perform all screening in duplicate with disagreements resolved by consensus and third-party  
4 adjudication when consensus could not be reached. After implementation of the search strategy, reviewers will  
5 work in pairs to screen all potentially relevant citations and references. Screening will be performed in two  
6 stages, initially reviewing titles and abstracts, and then full text for possibly relevant manuscripts. We will  
7 capture reasons for exclusion.  
8  
9  
10  
11  
12

### 13 **Obtaining individual patient data**

14  
15  
16  
17  
18 One reviewer (DA) will contact the primary author and/or sponsor of all selected trials for potential agreement  
19 to share de-identified individual patient data from their trial for the purpose of this patient-level meta-analysis.  
20 They will define whether data will be freely available or only after application to and approval by a learned  
21 intermediary and whether we will require a data use agreement. In case of non-response or refusal, we will use  
22 published aggregated data and combine them to the IPDMA results in a sensitivity analysis. Data will be stored  
23 on a secure server hosted by University of Versailles SQY.  
24  
25  
26  
27  
28  
29  
30

### 31 **Data extraction and management**

32  
33  
34 Two reviewers (RP and DA) will independently check data supplied for included trials for missing data, internal  
35 data consistency, randomization integrity (balance of patient characteristics at randomisation, pattern of  
36 randomisation), follow-up and censoring pattern. We will check summary tables with the trial protocol and  
37 latest trial report or publication. We will solve any discrepancies or unusual patterns with the study  
38 investigator. We will return a final copy of the form from each trial to the appropriate trial investigator for  
39 verification.  
40  
41  
42  
43  
44  
45  
46  
47  
48  
49

### 50 **Data items**

51  
52  
53 Specifically, with regards to the population of patients for the primary analysis, these will be adult patients with  
54 septic shock. Adults will be those 18 years or older at time of randomization. Septic shock will be defined  
55 according to the definition used in each clinical trial. Each included patient will meet at least one of the  
56 following criteria  
57  
58  
59  
60

- 1
- 2
- 3 1. Systolic blood pressure <100 mmHg or mean arterial pressure <65 mm Hg after fluid resuscitation
- 4
- 5 2. Lactate > 2mmol/L
- 6
- 7 3. Requirement for vasopressors to maintain an adequate blood pressure.
- 8

9 The intervention of interest is hydrocortisone, administered intravenously at a dose of less than 400mg per  
10 day, either in divided bolus doses, or as a continuous infusion. We will record the dose, the mode of  
11 administration, the duration of administration, and the mode of cessation, either tapered, or abruptly ceased.

12 We will record whether fludrocortisone was administered, the dose and duration of administration. The details  
13 of the comparison group, either placebo or standard care will be recorded.  
14

## 15 Outcomes and prioritization

16 The primary outcome measure for this meta-analysis will be 90-day all-cause mortality.

17 Secondary outcomes will include:

- 18 • All-cause mortality at ICU and hospital discharge, at 28 days and at 180 days,
- 19 • Time to resolution of organ failure (defined as a SOFA < 4), time to vasopressor withdrawal, and time  
20 to cessation of mechanical ventilation. We will also calculate organ-failure/vasopressor/mechanical  
21 ventilation free days (up to 28 day). Event free days will be calculated as the number of days alive  
22 from randomisation to day 28 and having a SOFA score<4, being off vasopressors, off mechanical  
23 ventilation. When death occurred before reaching a SOFA<4 or before being off vasopressor or  
24 mechanical ventilation, the number of event-free days will be zero. For these outcomes, we will  
25 consider only the first episode. Recovery from organ failure will be defined by a SOFA score<4 for at  
26 least 24 hours. Weaning from vasopressor will be defined by being off any dose of  
27 vasopressor/inotrope for at least 24 consecutive hours. Weaning from mechanical ventilation will be  
28 defined by being off any mode of respiratory support for at least 24 hours.
- 29 • Length of stay in the ICU and in the hospital,
- 30 • Superinfection, as defined by any new infection occurring >48 hours after randomization,
- 31 • Number of days with hyperglycaemia defined as, at least one episode of blood glucose levels >180g/dl  
32 in the corresponding 24 hours,  
33  
34  
35  
36  
37  
38  
39  
40  
41  
42  
43  
44  
45  
46  
47  
48  
49  
50  
51  
52  
53  
54  
55  
56  
57  
58  
59  
60



- Number of days with hypernatremia, defined as at least one episode of serum sodium concentration >150mmol/L in the corresponding 24 hours,
- Bleeding complications: gastroduodenal defined as any episode of gastroduodenal bleeding reported by the investigators of original studies, regardless the need for transfusion or haemostatic intervention
- Critical illness associated muscle weakness at the longest follow-up as defined in individual trials

### **Risk of bias in individual studies**

Risk of bias will be assessed, independently and in duplicate, for each of the individual studies using a modified Cochrane risk of bias tool<sup>20</sup> that classifies risk of bias as “low”, “probably low”, “probably high”, or “high” for each of the following domains: sequence generation, allocation sequence concealment, blinding, selective outcome reporting and other bias. We will rate the overall risk of bias as the highest risk attributed to any criterion. Reviewers will not contribute to risk of bias assessment for trials in which they have participated.

### **Data synthesis**

Baseline patient characteristics will be presented by study and treatment group. For continuous variables, mean and standard deviation (SD) or median and interquartile range (IQR) will be reported, as appropriate. For categorical variables, the number of observations in each category and corresponding proportions will be reported. Patient characteristics across groups will be contrasted using nonparametric Kruskal-Wallis tests for continuous variables and chi-square or Fisher exact tests for categorical variables. Since earlier and later deaths may stem from qualitatively different processes, to provide a more comprehensive depiction of mortality, length of stay in the ICU or in the hospital will be reported in the overall population as well as in the subpopulation of survivors at day 90. All tests will be two-sided and conducted at significance level 0.05. No formal adjustment for multiple testing will be undertaken. Given the number of secondary outcomes and subgroup analyses to be performed, interpretation of p-values, beyond the primary outcome, will be undertaken very cautiously.

## Data analysis

We will consider as the primary analysis, the comparison between hydrocortisone (with or without fludrocortisone) and placebo (or no treatment) on 90-day mortality for patients with septic shock, Pre-specified secondary analyses will include all possible pairwise comparisons, namely, hydrocortisone versus placebo, hydrocortisone plus fludrocortisone versus placebo, hydrocortisone plus fludrocortisone versus hydrocortisone.

In order to increase the robustness of the results, we will perform two different statistical approaches, i.e. a one stage conventional meta-analysis and machine-learning targeted maximum likelihood analysis.

As suggested by different studies comparing one-stage to two-stage approaches<sup>21 22</sup> the conventional will be performed using a one-stage meta-analysis. In one-stage meta-analysis, all data from all studies are aggregated and the primary outcome is analyzed simultaneously by adopting a single statistical model that accounts for potential heterogeneity across studies.<sup>23</sup> Analyses will rely on generalized linear mixed effect models (GLMM) where both the intercept and the treatment effect will be treated as random variables with the study as the subject (i.e. a random study intercept and a random study-by-treatment interaction). For the primary outcome and for binary secondary outcomes, we will use a GLMM with a logit link function.

Continuous secondary outcomes will be analysed using a GLMM with an identity link function. Our estimates of the average treatment effect will be adjusted for study (random effect), age, predicted mortality from SAPS2 or APACHE 2, SOFA, admission type (medical, elective surgery or emergent surgery), infection site infection type (hospital versus community acquired infection) and type of pathogen, baseline and increment in cortisol levels post corticotrophin, lactate levels, and need for mechanical ventilation (fixed effects). A study-by-treatment interaction term will be also be included in the model. For withdrawal of vasopressor therapy, withdrawal of mechanical ventilation, and recovery from organ failure (defined by a SOFA score <4 for at least 24 hours), cumulative event incidences will be estimated using a nonparametric estimator and will be compared using Gray's test, with death treated as a competing risk<sup>24</sup> and study used as random effect .<sup>25</sup>

We will also estimate the average treatment effect via a more flexible estimator, namely the targeted maximum likelihood estimator (TMLE).<sup>26</sup> In this analysis, different portions of the likelihood will be modelled using Super Learner and combined to produce a plug-in estimator of the average treatment effect that is consistent, double robust and asymptotically linear. We will use a Super Learner with a large library including

1  
2  
3 logistic regression models, stepwise regression models based on the Akaike information criterion, mixed  
4  
5 logistic models with random effect to account for study-level and patient-level heterogeneity, multivariate  
6  
7 adaptive regression splines, random forests, Bayesian generalized linear models, elastic net regularized  
8  
9 generalized linear models, and gradient boosting, to estimate flexibly the relationship between mean outcome  
10  
11 and covariates. For the pairwise comparisons between combinations of hydrocortisone, fludrocortisone and  
12  
13 placebo, we will use network meta-analysis techniques<sup>27</sup> to assess the robustness of the results.

14  
15 For binary outcomes, we will describe the average treatment effect using risk ratio (RR) or odds ratio (OR)  
16  
17 estimate along with corresponding 95% CI and p-value. For continuous outcomes, we will describe the average  
18  
19 treatment effect using mean difference (MD) estimate along with a corresponding 95% CI and p-value. We will  
20  
21 test for qualitative interaction between treatment effect and subgroup of interest using the Gail and Simon  
22  
23 interaction test.<sup>28</sup>

### 24 25 26 27 28 **Subgroup analysis**

29  
30  
31 We will perform, if data permit, the following subgroup analyses:

- 32  
33 • We will examine treatment effect in the subgroup of patients meeting sepsis or septic shock criteria  
34  
35 according to Sepsis 3 definition<sup>4</sup>;
  - 36  
37 • We will also examine any variation in response to treatment according to baseline prognosis factors  
38  
39 including  
40  
41
    - 42 ○ age (by quartiles),
    - 43 ○ sex,
    - 44 ○ vasopressor-dependency (yes versus no, and by quartiles of baseline dose),
    - 45 ○ vasopressin administration (yes or no),
    - 46 ○ predicted mortality from SAPSII or APACHEII (by quartiles),
    - 47 ○ SOFA score (by quartiles),
    - 48 ○ arterial lactate levels (by quartiles) and
    - 49 ○ etomidate-free versus etomidate-exposed patients
- 50  
51  
52  
53  
54  
55  
56  
57  
58  
59  
60

- We will examine any variation in treatment response according to patient's adrenal status, i.e. responders to standard corticotrophin test (those whom stimulated cortisol levels increased by >9µg/dL from baseline value) versus non-responders to corticotrophin test, and
- we will examine any variation in response to treatment according to infection characteristics, i.e.
  - community versus hospital acquired,
  - medical vs. surgical, lung versus other sources of infection, and
  - gram negative versus gram positive versus polymicrobial.

### Methods to assess bias

We will assess for the potential for publication bias or small study bias by inspection of funnel plots and the use of Egger's test. The potential bias introduced by the studies that could not be included in the analyses will be evaluated<sup>29</sup> by performing a two-stage meta-analysis aggregating the results obtained on shared data and treatment effect estimates published for unshared data, if data permit. Specifically, the available IPD will first be reduced to aggregated data using the modelling methods described above. Then, these aggregated data will be pooled with published aggregated data into a weighted average.<sup>30 31</sup> Heterogeneity will be assessed by using an estimate of Tau<sup>2</sup> generated from the one stage and two-stage models.

### Confidence in cumulative evidence

We will present a summary of results and recommendations in accordance with the GRADE approach to assess the overall quality of the evidence.<sup>32 33</sup>

### Consumer review:

This protocol is under review by sepsis survivors and stakeholders from the Australian Sepsis Network.<sup>34</sup>

### Dissemination

1  
2  
3 We will report the findings according to the PRISMA-IPD statement.<sup>18</sup> We will share the findings from this  
4  
5 IPDMA with primary authors and sponsors of included trials prior to submitting the results of this primary  
6  
7 analysis for publication.  
8  
9

#### 10 **Publications Plan:**

- 14 **1.** The study protocol including the statistical analysis plan will be published prior to publishing the  
15  
16 results of the primary analysis
- 17  
18 **2.** Upon completion of the primary analysis, the main manuscript will be submitted to one of the major  
19  
20 clinical journals regardless of the results.
- 21  
22 **3.** Sub-studies, as approved by the Executive Committee, can be published after the publication of the  
23  
24 primary analysis. The Executive Committee will grant authorship depending on personal input but shall  
25  
26 include appropriate acknowledgment of the included trials, site Investigators and the Clinical Trials  
27  
28 Groups where appropriate.  
29

#### 30 31 **Authorship Guidance:**

32  
33  
34  
35 In keeping with the ICMJE guidance ([http://www.icmje.org/recommendations/browse/roles-and-](http://www.icmje.org/recommendations/browse/roles-and-responsibilities/defining-the-role-of-authors-and-contributors.html)  
36  
37 [responsibilities/defining-the-role-of-authors-and-contributors.html](http://www.icmje.org/recommendations/browse/roles-and-responsibilities/defining-the-role-of-authors-and-contributors.html)), authors shall meet the following 4 criteria:  
38  
39 Substantial contributions to the conception or design of the work; or the acquisition, analysis, or interpretation  
40  
41 of data for the work; AND

- 42  
43 • Drafting the work or revising it critically for important intellectual content; AND
- 44  
45 • Final approval of the version to be published; AND
- 46  
47 • Agreement to be accountable for all aspects of the work in ensuring that questions related to the  
48  
49 accuracy or integrity of any part of the work are appropriately investigated and resolved  
50

#### 51 52 **Authorships specifics:**

53  
54  
55  
56 For the principal publication the study will be conducted in the name of the **Utility of Steroids in Septic Shock**  
57  
58 (ULYSSES) IPDMA investigators and acknowledge the included studies, and where appropriate, the Clinical  
59  
60 Trials Groups. Where individuals' name is required for publication (e.g.: publication mast) the listing of authors

1  
2  
3 will be as follows: Prof Romain Pirracchio will be the first author, Prof Djillali Annane will be the second (listed  
4 as co-first) and corresponding author, followed by members of the writing committee, with Associate Professor  
5 Delaney as the senior author. The writing committee shall comprise the included trials' chief investigators and  
6  
7 members of the executive committee who have contributed substantially to one or more of: trial design or  
8  
9 management, or data analysis and meet the ICMJE criteria for authorship.<sup>35</sup>  
10  
11  
12  
13  
14

## 15 Ethics

16  
17 This planned IPDMA will use existing data from completed randomized controlled trials, reporting explicitly  
18  
19 ethical approval of the original protocol and the process for obtaining patients consent.  
20  
21  
22

## 23 Discussion

24  
25 This IPDMA will provide the highest level of evidence about the benefit and risk of hydrocortisone therapy for  
26  
27 adults with septic shock.<sup>36 37</sup> This collaborative group includes most of the principal investigators of trials on  
28  
29 hydrocortisone for sepsis/septic shock, reducing the risk of sharing refusal. In contrast to trial-level meta-  
30  
31 analyses, this IPDMA will permit clarifying the role of fludrocortisone and identifying the optimal modalities for  
32  
33 corticosteroids administration in septic shock. In addition, it will help identifying subgroups of patients more  
34  
35 likely to benefit from corticosteroids and those at high risk of harm. Finally, we will use the one-stage analysis  
36  
37 and a machine learning with targeted maximum likelihood analysis (TMLE).<sup>26</sup> TMLE may reduce bias and  
38  
39 increase efficiency and power when applied to treatment effect estimation in trials.<sup>38</sup> TMLE requires to model  
40  
41 separately different parts of the likelihood. A wide variety of flexible regression algorithms including mixed-  
42  
43 effect models may help mitigating the risk of model misspecification associated with standard regression  
44  
45 approaches. The Super Learner (SL)<sup>39</sup> is an ensemble machine-learning algorithm that automatically constructs  
46  
47 an optimal weighted combination estimator based on a collection of supplied candidate estimators. The SL  
48  
49 yields an estimator that is mathematically guaranteed to perform essentially as well as or better than the best  
50  
51 candidate among the ones it is built upon – this is significant since in practice which of the candidate estimators  
52  
53 behaves best in a given problem and dataset is not known to the analyst.<sup>39</sup> In the context of IPDMA, as  
54  
55 compared to GLMM, this approach may avoid any strong assumption about the functional form of the  
56  
57 relationship between outcome and explanatory variables. It may help leverage the advantages of all candidate  
58  
59  
60

1  
2  
3 learners such as GLMM. Finally, it may allow accounting for potential high-order interactions by including in the  
4  
5 library highly flexible algorithms such as random forests. In this analysis, different portions of the likelihood will  
6  
7 be modelled using SL and combined to produce a plug-in estimator of the average treatment effect that is  
8  
9 consistent, double robust and asymptotically linear.  
10

## 11 **Conclusion.**

12  
13  
14  
15  
16 This protocol outlines the rationale, methods, analysis plan and publication plan for an individual patient data  
17  
18 meta-analysis to assess the effect of hydrocortisone, with and without fludrocortisone, on 90-day mortality and  
19  
20 other outcomes in patients with septic shock.  
21  
22  
23

## 24 **Acknowledgment**

25  
26 We would like to thank the primary authors and sponsors that have provided access to their trial's database.  
27  
28  
29

## 30 **Conflict of interest**

31  
32 Djillali ANNANE: has received funding from French government to conduct trials that will be included in this  
33  
34 systematic review (trials acronym: Ger-Inf-05; COITSS, APROCCHS) – he received funding for FHU SEPSIS and  
35  
36 RHU RECORDS research programs. The current IPDMA he was responsible for the Cochrane systematic review  
37  
38 on corticosteroids for sepsis in children and adults, and this work will use part of data obtained in the Cochrane  
39  
40 review.  
41

42 Romain PIRRACCHIO : no conflict of interest

43 Laurent BILLOT : no conflict of interest

44 André WASCHKA : no conflict of interest

45 Sylvie CHEVRET : no conflict of interest

46 Jeremy COHEN: no conflict of interest

47 Simon FINFER: no conflict of interest

48  
49 Anthony C. GORDON: has received funding from an NIHR Research Professorship (RP-2015-06-18),  
50  
51 consulting fees paid to his institution from GlaxoSmithKline and Bristol Myers Squibb, and personal  
52  
53 consulting fees from Baxter Healthcare  
54

55 Naomi HAMMOND: no conflict of interest

56 John MYBURGH: no conflict of interest

57  
58 Balasubramanian VENKATESH: no conflict of interest  
59  
60

1  
2  
3 Anthony DELANEY: no conflict of interest  
4  
5  
6

7 **Data statements**

8  
9 Data may be accessed only by written request to the primary author of individual studies that will be included  
10  
11 in this individual patient data meta-analysis.  
12  
13  
14  
15  
16  
17  
18  
19  
20  
21  
22  
23  
24  
25  
26  
27  
28  
29  
30  
31  
32  
33  
34  
35  
36  
37  
38  
39  
40  
41  
42  
43  
44  
45  
46  
47  
48  
49  
50  
51  
52  
53  
54  
55  
56  
57  
58  
59  
60

For peer review only



## Reference

1. Reinhart K, Daniels R, Kissoon N, et al. Recognizing Sepsis as a Global Health Priority - A WHO Resolution. *The New England journal of medicine* 2017;377(5):414-17. doi: 10.1056/NEJMp1707170 [published Online First: 2017/06/29]
2. Rudd KE, Johnson SC, Agesa KM, et al. Global, regional, and national sepsis incidence and mortality, 1990-2017: analysis for the Global Burden of Disease Study. *Lancet* 2020;395(10219):200-11. doi: 10.1016/s0140-6736(19)32989-7 [published Online First: 2020/01/20]
3. Rhodes A, Evans LE, Alhazzani W, et al. Surviving Sepsis Campaign: International Guidelines for Management of Sepsis and Septic Shock: 2016. *Intensive care medicine* 2017;43(3):304-77. doi: 10.1007/s00134-017-4683-6 [published Online First: 2017/01/20]
4. Singer M, Deutschman CS, Seymour CW, et al. The Third International Consensus Definitions for Sepsis and Septic Shock (Sepsis-3). *Jama* 2016;315(8):801-10. doi: 10.1001/jama.2016.0287 [published Online First: 2016/02/24]
5. Kinsell LW, Boling L, Partridge JW, et al. Corticotropin (ACTH) and cortisone; newer concepts of their use in clinical practice. *Calif Med* 1953;78(6):487-90. [published Online First: 1953/06/01]
6. Annane D, Renault A, Brun-Buisson C, et al. Hydrocortisone plus Fludrocortisone for Adults with Septic Shock. *The New England journal of medicine* 2018;378(9):809-18. doi: 10.1056/NEJMoa1705716 [published Online First: 2018/03/01]
7. Venkatesh B, Finfer S, Cohen J, et al. Adjunctive Glucocorticoid Therapy in Patients with Septic Shock. *The New England journal of medicine* 2018;378(9):797-808. doi: 10.1056/NEJMoa1705835 [published Online First: 2018/01/20]
8. Allen JM, Feild C, Shoulders BR, et al. Recent Updates in the Pharmacological Management of Sepsis and Septic Shock: A Systematic Review Focused on Fluid Resuscitation, Vasopressors, and Corticosteroids. *Ann Pharmacother* 2019;53(4):385-95. doi: 10.1177/1060028018812940 [published Online First: 2018/11/09]

- 1  
2  
3 9. Annane D, Bellissant E, Bollaert PE, et al. Corticosteroids for treating sepsis in children and adults. *Cochrane*  
4 *Database Syst Rev* 2019;12:Cd002243. doi: 10.1002/14651858.CD002243.pub4 [published Online First:  
5 2019/12/07]  
6  
7  
8  
9  
10 10. Fang F, Zhang Y, Tang J, et al. Association of Corticosteroid Treatment With Outcomes in Adult Patients  
11 With Sepsis: A Systematic Review and Meta-analysis. *JAMA internal medicine* 2019;179(2):213-23. doi:  
12 10.1001/jamainternmed.2018.5849 [published Online First: 2018/12/24]  
13  
14  
15  
16 11. Lin LL, Gu HY, Luo J, et al. Impact and Beneficial Critical Points of Clinical Outcome in Corticosteroid  
17 Management of Adult Patients With Sepsis: Meta-Analysis and GRADE Assessment. *Front Pharmacol*  
18 2019;10:1101. doi: 10.3389/fphar.2019.01101 [published Online First: 2019/10/15]  
19  
20  
21  
22  
23 12. Ni YN, Liu YM, Wang YW, et al. Can corticosteroids reduce the mortality of patients with severe sepsis? A  
24 systematic review and meta-analysis. *Am J Emerg Med* 2019;37(9):1657-64. doi: 10.1016/j.ajem.2018.11.040  
25 [published Online First: 2018/12/14]  
26  
27  
28  
29 13. Rochweg B, Oczkowski SJ, Siemieniuk RAC, et al. Corticosteroids in Sepsis: An Updated Systematic Review  
30 and Meta-Analysis. *Critical care medicine* 2018;46(9):1411-20. doi: 10.1097/ccm.0000000000003262  
31 [published Online First: 2018/07/07]  
32  
33  
34  
35  
36 14. Rygard SL, Butler E, Granholm A, et al. Low-dose corticosteroids for adult patients with septic shock: a  
37 systematic review with meta-analysis and trial sequential analysis. *Intensive care medicine* 2018;44(7):1003-16.  
38 doi: 10.1007/s00134-018-5197-6 [published Online First: 2018/05/16]  
39  
40  
41  
42  
43 15. Zhou X, Hu C, Yao L, et al. Effect of adjunctive corticosteroids on clinical outcomes in adult patients with  
44 septic shock - a meta-analysis of randomized controlled trials and trial sequential analysis. *J Crit Care*  
45 2018;48:296-306. doi: 10.1016/j.jcrc.2018.09.013 [published Online First: 2018/10/01]  
46  
47  
48  
49 16. Lamontagne F, Quiroz Martinez H, Adhikari NK, et al. Corticosteroid use in the intensive care unit: a survey  
50 of intensivists. *Can J Anaesth* 2013;60(7):652-9. doi: 10.1007/s12630-013-9929-3 [published Online First:  
51 2013/04/23]  
52  
53  
54  
55  
56 17. Shamseer L, Moher D, Clarke M, et al. Preferred reporting items for systematic review and meta-analysis  
57 protocols (PRISMA-P) 2015: elaboration and explanation. *BMJ : British Medical Journal* 2015;349  
58  
59  
60

- 1  
2  
3 18. Stewart LA, Clarke M, Rovers M, et al. Preferred Reporting Items for Systematic Review and Meta-Analyses  
4 of individual participant data: the PRISMA-IPD Statement. *Jama* 2015;313(16):1657-65. doi:  
5  
6 10.1001/jama.2015.3656 [published Online First: 2015/04/29]  
7  
8  
9 19. Higgins JP, Altman DG, Gotzsche PC, et al. The Cochrane Collaboration's tool for assessing risk of bias in  
10 randomised trials. *BMJ (Clinical research ed)* 2011;343:d5928. doi: 10.1136/bmj.d5928 [published Online First:  
11  
12 2011/10/20]  
13  
14  
15 20. Guyatt G, Oxman AD, Sultan S, et al. GRADE guidelines: 11. Making an overall rating of confidence in effect  
16 estimates for a single outcome and for all outcomes. *Journal of clinical epidemiology* 2013;66(2):151-7. doi:  
17  
18 10.1016/j.jclinepi.2012.01.006 [published Online First: 2012/05/01]  
19  
20  
21  
22 21. Kontopantelis E. A comparison of one-stage vs two-stage individual patient data meta-analysis methods: A  
23 simulation study. *Res Synth Methods* 2018;9(3):417-30. doi: 10.1002/jrsm.1303 [published Online First:  
24  
25 2018/05/23]  
26  
27  
28 22. Mathew T, Nordstrom K. Comparison of one-step and two-step meta-analysis models using individual  
29 patient data. *Biom J* 2010;52(2):271-87. doi: 10.1002/bimj.200900143 [published Online First: 2010/03/30]  
30  
31  
32  
33 23. Debray TP, Koffijberg H, Nieboer D, et al. Meta-analysis and aggregation of multiple published prediction  
34 models. *Statistics in medicine* 2014;33(14):2341-62. doi: 10.1002/sim.6080 [published Online First: 2014/04/23]  
35  
36  
37  
38 24. Fine JP, Gray RJ. A Proportional Hazards Model for the Subdistribution of a Competing Risk. *Journal of the*  
39  
40  
41  
42  
43 25. Katsahian S, Resche-Rigon M, Chevret S, et al. Analysing multicentre competing risks data with a mixed  
44 proportional hazards model for the subdistribution. *Statistics in medicine* 2006;25(24):4267-78. doi:  
45  
46 10.1002/sim.2684 [published Online First: 2006/09/09]  
47  
48  
49 26. van der Laan MJ, Rose S. Targetted Learning. Causal inference for observational and experimental data.  
50  
51  
52  
53  
54 27. Debray TP, Schuit E, Efthimiou O, et al. An overview of methods for network meta-analysis using individual  
55 participant data: when do benefits arise? *Stat Methods Med Res* 2018;27(5):1351-64. doi:  
56  
57  
58  
59 10.1177/0962280216660741 [published Online First: 2016/08/05]  
60

- 1  
2  
3 28. Gail M, Simon R. Testing for qualitative interactions between treatment effects and patient subsets.  
4  
5 *Biometrics* 1985;41(2):361-72. [published Online First: 1985/06/01]  
6  
7  
8 29. Ahmed I, Sutton AJ, Riley RD. Assessment of publication bias, selection bias, and unavailable data in meta-  
9  
10 analyses using individual participant data: a database survey. *BMJ (Clinical research ed)* 2012;344:d7762. doi:  
11  
12 10.1136/bmj.d7762 [published Online First: 2012/01/05]  
13  
14 30. Riley RD, Lambert PC, Staessen JA, et al. Meta-analysis of continuous outcomes combining individual  
15  
16 patient data and aggregate data. *Statistics in medicine* 2008;27(11):1870-93. doi: 10.1002/sim.3165 [published  
17  
18 Online First: 2007/12/12]  
19  
20  
21 31. Riley RD, Simmonds MC, Look MP. Evidence synthesis combining individual patient data and aggregate  
22  
23 data: a systematic review identified current practice and possible methods. *Journal of clinical epidemiology*  
24  
25 2007;60(5):431-9. doi: 10.1016/j.jclinepi.2006.09.009 [published Online First: 2007/04/11]  
26  
27  
28 32. Guyatt G, Oxman AD, Akl EA, et al. GRADE guidelines: 1. Introduction-GRADE evidence profiles and  
29  
30 summary of findings tables. *Journal of clinical epidemiology* 2011;64(4):383-94. doi:  
31  
32 10.1016/j.jclinepi.2010.04.026 [published Online First: 2011/01/05]  
33  
34 33. Guyatt GH, Oxman AD, Vist GE, et al. GRADE: an emerging consensus on rating quality of evidence and  
35  
36 strength of recommendations. *BMJ (Clinical research ed)* 2008;336(7650):924-6. doi:  
37  
38 10.1136/bmj.39489.470347.AD [published Online First: 2008/04/26]  
39  
40  
41 34. Australian Sepsis Network Management Committee. Australian Sepsis Network [Available from:  
42  
43 [www.australiansepsisnetwork.net.au](http://www.australiansepsisnetwork.net.au) accessed 8th May 2020.  
44  
45  
46 35. International Committee of Medical Journal Editors. Recommendations for the Conduct, Reporting, Editing  
47  
48 and Publication of Scholarly Work in Medical Journals 2019 [Available from: [http://www.icmje.org/icmje-](http://www.icmje.org/icmje-recommendations.pdf)  
49  
50 [recommendations.pdf](http://www.icmje.org/icmje-recommendations.pdf) accessed 8th May, 2020 2020.  
51  
52 36. Stewart LA, Parmar MKB. Meta-analysis of the literature or of individual patient data: is there a difference?  
53  
54 *The Lancet* 1993;341(8842):418-22. doi: [https://doi.org/10.1016/0140-6736\(93\)93004-K](https://doi.org/10.1016/0140-6736(93)93004-K)  
55  
56  
57  
58  
59  
60

- 1  
2  
3 37. Vale CL, Rydzewska LH, Rovers MM, et al. Uptake of systematic reviews and meta-analyses based on  
4 individual participant data in clinical practice guidelines: descriptive study. *BMJ (Clinical research ed)*  
5 2015;350:h1088. doi: 10.1136/bmj.h1088 [published Online First: 2015/03/10]  
6  
7  
8  
9 38. Moore KL, van der Laan MJ. Covariate adjustment in randomized trials with binary outcomes: targeted  
10 maximum likelihood estimation. *Statistics in medicine* 2009;28(1):39-64. doi: 10.1002/sim.3445 [published  
11 Online First: 2008/11/06]  
12  
13  
14  
15  
16 39. van der Laan MJ, Polley EC, Hubbard AE. Super learner. *Stat Appl Genet Mol Biol* 2007;6:Article25. doi:  
17 10.2202/1544-6115.1309 [published Online First: 2007/10/04]  
18  
19  
20  
21  
22  
23  
24  
25  
26  
27  
28  
29  
30  
31  
32  
33  
34  
35  
36  
37  
38  
39  
40  
41  
42  
43  
44  
45  
46  
47  
48  
49  
50  
51  
52  
53  
54  
55  
56  
57  
58  
59  
60

## Appendix 1

### The Utility of Steroids in Septic Shock individual Patient Data Meta-Analysis (ULYSSES IPDMA) Collaborators

- Djillali Annane: Department of Critical Care; Raymond Poincaré Hospital (AP-HP) Laboratory Infection & Inflammation, U1173, Faculty of Health Science Simone Veil, University of Versailles SQY- University Paris Saclay – INSERM- FHU SEPSIS; RHU RECORDS, France
- Yaseen Arabi: Intensive Care Department; Medical Director, Respiratory Services Professor, College of Medicine King Saud Bin Abdulaziz University for Health Sciences King Abdulaziz Medical City; Saudi Arabia
- Laurent Billot: The George Institute for Global Health, Faculty of Medicine, University of New South Wales, Sydney, Australia
- Pierre Edouard Bollaert: Service de Médecine Intensive Réanimation, CHRU de Nancy, Hôpital Central, 54035 Nancy Cedex, France
- Josef Briegel : Ludwig-Maximilians-Universität München Klinik für Anaesthesiologie Marchioninstr. München ; Germany
- Sylvie Chevret: Department of Bioinformatics and Statistics, hôpital Saint Louis (AP-HP), University of Paris, Paris, France
- Jeremy Cohen: The George Institute for Global Health, Sydney. Royal Brisbane and Women’s Hospital, University of Queensland, Brisbane. The Wesley Hospital, Brisbane. The University of Queensland
- Anthony Delaney: Division of Critical Care, The George Institute for Global Health, University of New South Wales, Newtown, Sydney, NSW. Malcolm Fisher Department of Intensive Care Medicine, Royal North Shore Hospital, St. Leonards, NSW, Australia

- 1  
2  
3 - Naomi Hammond: Division of Critical Care, The George Institute for Global Health,  
4 University of New South Wales, Newtown, Sydney, NSW. Malcolm Fisher Department  
5 of Intensive Care Medicine, Royal North Shore Hospital, St. Leonards, NSW, Australia  
6  
7  
8  
9  
10 - Didier Keh: Oberarzt Klinik für Anästhesiologie m.S. operative Intensivmedizin CCM/CVK  
11 Canpus Virchow-Klinikum  
12  
13  
14  
15 Berlin; Germany  
16  
17 - Simon Finfer: Division of Critical Care, The George Institute for Global Health,  
18 University of New South Wales, Newtown, Sydney, NSW. Malcolm Fisher Department  
19 of Intensive Care Medicine, Royal North Shore Hospital, St. Leonards, NSW, Australia  
20  
21  
22  
23  
24 - Anthony Gordon: Division of Anaesthetics, Pain Medicine and Intensive Care,  
25 Imperial College London, London UK  
26  
27  
28  
29 - Ling Liu: Department of critical Medicine, Zhong-Da Hospital and school of clinical  
30 Medine, Southeast University, Nanjing 210009, China.  
31  
32  
33  
34 - Umberto G. Meduri: University of Tennessee Health Science Center and Memphis VA  
35 Medical Center, Memphis TN, USA  
36  
37  
38  
39 - Liliana Mirea: Anaesthesia and Intensive Care, Clinical Emergency Hospital of  
40 Bucharest, 2ENT, Elias Clinical Emergency Hospital, Endocrinology, National,  
41 Bucharest, Romania  
42  
43  
44  
45  
46 - John Myburgh: Division of Critical Care, The George Institute for Global Health,  
47 University of New South Wales, Newtown, Sydney, NSW. University of New South  
48 Wales, St. George Clinical School, Sydney, NSW, Australia  
49  
50  
51  
52  
53 - Romain Pirracchio: Department of Anesthesia and Perioperative Medicine; Zuckerberg  
54 San Francisco General Hospital and Trauma Center; University of California San  
55 Francisco, USA  
56  
57  
58  
59  
60

- 1  
2  
3 - Charles L. Sprung: Department of Anesthesiology, Critical Care Medicine and Pain,  
4 Hadassah Hebrew University Medical Center, Jerusalem, Israel  
5  
6  
7  
8 - Nejla Tilouche : Intensive Care Unit, University Hospital Taher Sfar Mahdia 5100,;  
9  
10 University of Monastir, Research Laboratory, Tunisia  
11  
12  
13 - Surat Tongyoo: Faculty of Medicine, Siriraj Hospital, Mahidol University, No. 2,  
14 Prannok Road, Bangkoknoi, Bangkok, 10700, Thailand. [surat\\_ty@yahoo.co.uk](mailto:surat_ty@yahoo.co.uk).  
15  
16  
17 - Balasubramanian Venkatesh: Division of Critical Care, The George Institute for Global  
18 Health, University of New South Wales, Newtown, Sydney, NSW, Australia; The  
19 Princess Alexandra Hospital, Brisbane, Queensland, Australia  
20  
21  
22  
23 - Andre Waschka: Department of Statistics; Zuckerberg San Francisco General Hospital  
24 and Trauma Center; University of California San Francisco, USA  
25  
26  
27  
28 - Ruiqiang Zheng: Department of Critical Care Medicine, the Northern Jiangsu People's  
29 Hospital, Yangzhou 225001, Jiangsu, China.  
30  
31  
32  
33  
34  
35  
36  
37  
38  
39  
40  
41  
42  
43  
44  
45  
46  
47  
48  
49  
50  
51  
52  
53  
54  
55  
56  
57  
58  
59  
60



## Appendix 1: Search strategy

### 1 Search strategy for CENTRAL

#1 MeSH descriptor: [Sepsis] explode all trees

#2 MeSH descriptor: [Shock, Septic] explode all trees

#3 MeSH descriptor: [Systemic Inflammatory Response Syndrome] explode all trees

#4 MeSH descriptor: [Central Nervous System Bacterial Infections] explode all trees and with qualifier(s): [blood - BL, complications - CO, drug therapy - DT]

#5 MeSH descriptor: [Pneumonia] explode all trees

#6 MeSH descriptor: [Community-Acquired Infections] explode all trees and with qualifier(s): [complications - CO, drug therapy - DT]

#7 MeSH descriptor: [Respiratory Distress Syndrome, Adult] explode all trees and with qualifier(s): [complications - CO, drug therapy - DT]

#8 MeSH descriptor: [Acute Lung Injury] explode all trees and with qualifier(s): [complications - CO, drug therapy - DT]

#9 sepsis or (septic\* NEAR/3 shock\*)

#10 (bacterem\* or bacteraem\* or pyrexia or septicaem\* or septicem\*)

#11 SIRS or (Inflammatory next Response next Syndrome\*)

#12 bacteria\* NEAR infect\* NEAR (blood\* or serum or invas\* or severe or systemic)

#13 ((community next acquired) or severe) NEAR pneumonia

#14 (acute or adult) NEAR/2 (respiratory NEAR/2 distress)

#15 (acute or adult) NEAR/2 (lung NEAR/2 injury)

#16 ARDS

#17 #1 or #2 or #3 or #4 or #5 or #6 or #7 or #8 or #9 or #10 or #11 or #12 or #13 or #14 or #15 or #16

#18 MeSH descriptor: [Adrenal Cortex Hormones] explode all trees

#19 MeSH descriptor: [Hydrocortisone] explode all trees

#20 MeSH descriptor: [Cortisone] explode all trees

1  
2  
3 #21 MeSH descriptor: [Steroids] explode all trees  
4

5 #22 corticosteroid\* or steroid\* or cortison\* or hydrocortison\*  
6

7 #23 methylprednisolon\* or (methyl next prednisolon\*) or betamethason\* or dexamethason\*  
8 or glucocorticoid\* or fludrocortison\* or mineralocorticoid\*  
9

10  
11 #24 #18 or #19 or #20 or #21 or #22 or #23  
12

13 #25 #17 and #24  
14

15 #26 #25 in Trials  
16  
17

## 18 19 **2 Search strategy for MEDLINE (Ovid SP)** 20

21 1 exp Sepsis/  
22

23 2 exp Shock, Septic/  
24

25 3 Systemic Inflammatory Response Syndrome/  
26

27 4 exp Bacteremia/  
28

29 5 Bacterial Infections/bl, dt, co  
30

31 6 Pneumonia/co, dt  
32

33 7 Community-Acquired Infections/co, dt  
34

35 8 Respiratory Distress Syndrome, Adult/co, dt  
36

37 9 Acute Lung Injury/co, dt  
38

39 10 (sepsis or septic\*).mp.  
40

41 11 (bacter?em\* or septic?em\* or pyrexia).mp.  
42

43 12 (SIRS or Inflammatory Response Syndrome\*).mp.  
44

45 13 (bacteria\* adj6 infect\* adj6 (blood\* or serum or invas\* or severe or systemic)).mp.  
46

47 14 ((community-acquired or severe) adj3 pneumonia).mp.  
48

49 15 ((acute or adult) adj2 (respiratory adj2 distress)).mp.  
50

51 16 ARDS.mp.  
52

53 17 ((acute or adult) adj2 (lung adj2 injury)).mp.  
54  
55  
56  
57  
58  
59  
60

1  
2  
3 18 1 or 2 or 3 or 4 or 5 or 6 or 7 or 8 or 9 or 10 or 11 or 12 or 13 or 14 or 15 or 16 or 17  
4

5 19 exp Adrenal Cortex Hormones/  
6

7 20 exp Hydrocortisone/  
8

9 21 (corticosteroid\* or steroid\* or cortison\* or hydrocortison\*).mp.  
10

11 22 (methylprednisolon\* or betamethason\* or dexamethason\* or glucocorticoid\* or  
12 fludrocortison\* or mineralocorticoid\*).mp.  
13

14 23 19 or 20 or 21 or 22  
15

16 24 18 and 23  
17

18 25 ((randomized controlled trial or controlled clinical trial).pt. or randomi?ed.ab. or  
19 placebo.ab. or clinical trials as topic.sh. or randomly.ab. or trial.ti.) not (animals not (humans  
20 and animals)).sh.  
21

22 26 24 and 25  
23  
24  
25  
26  
27

### 28 **3 Search strategy for Embase (Ovid SP)**

29 1 exp sepsis/  
30

31 2 exp septic shock/  
32

33 3 pneumonia/co, dt [Complication, Drug Therapy]  
34

35 4 adult respiratory distress syndrome/co, dt [Complication, Drug Therapy]  
36

37 5 acute lung injury/co, dt [Complication, Drug Therapy]  
38

39 6 systemic inflammatory response syndrome/co, dt [Complication, Drug Therapy]  
40

41 7 community acquired infection/co, dt [Complication, Drug Therapy]  
42

43 8 (sepsis or (septic\* adj5 shock) or (bacter?em\* or pyrexia or septic?em\*) or (SIRS or  
44 Inflammatory Response Syndrome\*)).mp.  
45

46 9 (bacteria\* adj2 infect\* adj2 (blood\* or serum or invas\* or severe or systemic)).mp.  
47

48 10 (((community-acquired or severe) adj2 pneumonia) or ((acute or adult) adj1 (respiratory  
49 adj1 distress)) or ((acute or adult) adj1 (lung adj1 injury)) or ARDS).mp.  
50

51 11 1 or 2 or 3 or 4 or 5 or 6 or 7 or 8 or 9 or 10  
52

53 12 steroid/  
54  
55  
56  
57  
58  
59  
60

1  
2  
3 13 corticosteroid/  
4

5 14 cortisone/  
6

7 15 hydrocortisone/  
8

9  
10 16 (corticosteroid\* or steroid\* or cortison\* or hydrocortison\* or (methylprednisolon\* or  
11 methyl prednisolon\* or betamethason\* or dexamethason\* or glucocorticoid\* or  
12 fludrocortison\* or mineralocorticoid\*)).mp.  
13

14  
15 17 12 or 13 or 14 or 15 or 16  
16

17 18 11 and 17  
18

19 19 ((placebo or randomized controlled trial).sh. or controlled study.ab. or random\*.ti,ab. or  
20 trial\*.ti,ab.) not (animal not human).sh.  
21

22  
23 20 18 and 19  
24

#### 25 26 **4 Search strategy for LILACS (via BIREME)** 27

28 (sepsis OR septic\$ OR SEPSIS OR SEPTIC OR SIRS OR "septic shock" OR "SEPTIC  
29 SHOCK/" OR SEPTICEMIA OR PNEUMONIA OR bact\* OR "adult respiratory distress  
30 syndrome" OR "acute lung injury" OR "systemic inflammatory response syndrome" OR  
31 "bacterial infection" OR "community acquired infection" ) (corticosteroid\* OR steroid\* OR  
32 glucocorticoid\* OR CORTCOSTEROID\* OR GLUCOCORTICOID/ OR STEROID OR  
33 MINERALOCORTICOID OR cortison\* OR hydrocortison\* OR fludrocortison\* OR  
34 betamethason\* OR methylprednisolon\* OR prednison\* OR dexamethason\*)  
35  
36  
37  
38  
39  
40  
41  
42  
43  
44  
45  
46  
47  
48  
49  
50  
51  
52  
53  
54  
55  
56  
57  
58  
59  
60

**PRISMA-P (Preferred Reporting Items for Systematic review and Meta-Analysis Protocols) 2015 checklist: recommended items to address in a systematic review protocol\***

| Section and topic                 | Item No | Checklist item                                                                                                                                                                                                         | Reported on page |
|-----------------------------------|---------|------------------------------------------------------------------------------------------------------------------------------------------------------------------------------------------------------------------------|------------------|
| <b>ADMINISTRATIVE INFORMATION</b> |         |                                                                                                                                                                                                                        |                  |
| Title:                            |         |                                                                                                                                                                                                                        |                  |
| Identification                    | 1a      | Identify the report as a protocol of a systematic review                                                                                                                                                               | 1                |
| Update                            | 1b      | If the protocol is for an update of a previous systematic review, identify as such                                                                                                                                     |                  |
| Registration                      | 2       | If registered, provide the name of the registry (such as PROSPERO) and registration number                                                                                                                             | 1                |
| Authors:                          |         |                                                                                                                                                                                                                        |                  |
| Contact                           | 3a      | Provide name, institutional affiliation, e-mail address of all protocol authors; provide physical mailing address of corresponding author                                                                              | 1                |
| Contributions                     | 3b      | Describe contributions of protocol authors and identify the guarantor of the review                                                                                                                                    | 2                |
| Amendments                        | 4       | If the protocol represents an amendment of a previously completed or published protocol, identify as such and list changes; otherwise, state plan for documenting important protocol amendments                        | 3                |
| Support:                          |         |                                                                                                                                                                                                                        |                  |
| Sources                           | 5a      | Indicate sources of financial or other support for the review                                                                                                                                                          | 3                |
| Sponsor                           | 5b      | Provide name for the review funder and/or sponsor                                                                                                                                                                      | 3                |
| Role of sponsor or funder         | 5c      | Describe roles of funder(s), sponsor(s), and/or institution(s), if any, in developing the protocol                                                                                                                     | 3                |
| <b>INTRODUCTION</b>               |         |                                                                                                                                                                                                                        |                  |
| Rationale                         | 6       | Describe the rationale for the review in the context of what is already known                                                                                                                                          | 7                |
| Objectives                        | 7       | Provide an explicit statement of the question(s) the review will address with reference to participants, interventions, comparators, and outcomes (PICO)                                                               | 8                |
| <b>METHODS</b>                    |         |                                                                                                                                                                                                                        |                  |
| Eligibility criteria              | 8       | Specify the study characteristics (such as PICO, study design, setting, time frame) and report characteristics (such as years considered, language, publication status) to be used as criteria for eligibility for the | 9,10             |

| review                             |     |                                                                                                                                                                                                                                                  |                |
|------------------------------------|-----|--------------------------------------------------------------------------------------------------------------------------------------------------------------------------------------------------------------------------------------------------|----------------|
| Information sources                | 9   | Describe all intended information sources (such as electronic databases, contact with study authors, trial registers or other grey literature sources) with planned dates of coverage                                                            | 11             |
| Search strategy                    | 10  | Present draft of search strategy to be used for at least one electronic database, including planned limits, such that it could be repeated                                                                                                       | 11, appendix 2 |
| Study records:                     |     |                                                                                                                                                                                                                                                  |                |
| Data management                    | 11a | Describe the mechanism(s) that will be used to manage records and data throughout the review                                                                                                                                                     | 11,12          |
| Selection process                  | 11b | State the process that will be used for selecting studies (such as two independent reviewers) through each phase of the review (that is, screening, eligibility and inclusion in meta-analysis)                                                  | 11             |
| Data collection process            | 11c | Describe planned method of extracting data from reports (such as piloting forms, done independently, in duplicate), any processes for obtaining and confirming data from investigators                                                           | 12             |
| Data items                         | 12  | List and define all variables for which data will be sought (such as PICO items, funding sources), any pre-planned data assumptions and simplifications                                                                                          | 12,13          |
| Outcomes and prioritization        | 13  | List and define all outcomes for which data will be sought, including prioritization of main and additional outcomes, with rationale                                                                                                             | 13,14          |
| Risk of bias in individual studies | 14  | Describe anticipated methods for assessing risk of bias of individual studies, including whether this will be done at the outcome or study level, or both; state how this information will be used in data synthesis                             | 14             |
| Data synthesis                     | 15a | Describe criteria under which study data will be quantitatively synthesised                                                                                                                                                                      | 14             |
|                                    | 15b | If data are appropriate for quantitative synthesis, describe planned summary measures, methods of handling data and methods of combining data from studies, including any planned exploration of consistency (such as $I^2$ , Kendall's $\tau$ ) | 14,15          |
|                                    | 15c | Describe any proposed additional analyses (such as sensitivity or subgroup analyses, meta-regression)                                                                                                                                            | 15,16          |
|                                    | 15d | If quantitative synthesis is not appropriate, describe the type of summary planned                                                                                                                                                               |                |
| Meta-bias(es)                      | 16  | Specify any planned assessment of meta-bias(es) (such as publication bias across studies, selective reporting within studies)                                                                                                                    | 17             |

1  
2  
3  
4  
5  
6  
7  
8  
9  
10  
11  
12  
13  
14  
15  
16  
17  
18  
19  
20  
21  
22  
23  
24  
25  
26  
27  
28  
29  
30  
31  
32  
33  
34  
35  
36  
37  
38  
39  
40  
41  
42  
43  
44  
45  
46  
47  
48  
49  
50  
51  
52  
53  
54  
55  
56  
57  
58  
59  
60

---

|                                         |    |                                                                                       |    |
|-----------------------------------------|----|---------------------------------------------------------------------------------------|----|
| Confidence<br>in cumulative<br>evidence | 17 | Describe how the strength of the body of<br>evidence will be assessed (such as GRADE) | 17 |
|-----------------------------------------|----|---------------------------------------------------------------------------------------|----|

---

For peer review only

# BMJ Open

## The effects of low dose hydrocortisone and hydrocortisone plus fludrocortisone in adults with septic shock: a protocol for a systematic review and meta-analysis of individual participant data

|                                 |                                                                                                                                                                                                                                                                                                                                                                                                                                                                                                                                                                                                                                                                                                                                                                                                                                                                 |
|---------------------------------|-----------------------------------------------------------------------------------------------------------------------------------------------------------------------------------------------------------------------------------------------------------------------------------------------------------------------------------------------------------------------------------------------------------------------------------------------------------------------------------------------------------------------------------------------------------------------------------------------------------------------------------------------------------------------------------------------------------------------------------------------------------------------------------------------------------------------------------------------------------------|
| Journal:                        | <i>BMJ Open</i>                                                                                                                                                                                                                                                                                                                                                                                                                                                                                                                                                                                                                                                                                                                                                                                                                                                 |
| Manuscript ID                   | bmjopen-2020-040931.R1                                                                                                                                                                                                                                                                                                                                                                                                                                                                                                                                                                                                                                                                                                                                                                                                                                          |
| Article Type:                   | Protocol                                                                                                                                                                                                                                                                                                                                                                                                                                                                                                                                                                                                                                                                                                                                                                                                                                                        |
| Date Submitted by the Author:   | 28-Sep-2020                                                                                                                                                                                                                                                                                                                                                                                                                                                                                                                                                                                                                                                                                                                                                                                                                                                     |
| Complete List of Authors:       | annane, djillali; Versailles Saint-Quentin-en-Yvelines University, School of medicine; Universite Paris-Saclay<br>PIRRACCHIO, Romain; Zuckerberg San Francisco General Hospital and Trauma Center<br>Billot, Laurent; The George Institute for Global Health, Statistics Division<br>Waschka, Andre; University of California Berkeley<br>Chevret, Sylvie; University of Paris<br>Cohen, Jeremy; University of Queensland,<br>Finfer, Simon; The George Institute for Global Health<br>Gordon, Anthony; Imperial College London, 1. Section of Anaesthetics, Pain Medicine and Intensive Care<br>Hammond, Naomi ; George Institute for Global Health,<br>Myburgh, John; University of New South Wales, St George Clinical School<br>Venkatesh, Balasubramanian; Royal Brisbane and Women's Hospital<br>Delaney, Anthony; The George Institute for Global Health |
| <b>Primary Subject Heading</b>: | Intensive care                                                                                                                                                                                                                                                                                                                                                                                                                                                                                                                                                                                                                                                                                                                                                                                                                                                  |
| Secondary Subject Heading:      | Emergency medicine, Infectious diseases, Pharmacology and therapeutics                                                                                                                                                                                                                                                                                                                                                                                                                                                                                                                                                                                                                                                                                                                                                                                          |
| Keywords:                       | Adult intensive & critical care < INTENSIVE & CRITICAL CARE, Clinical trials < THERAPEUTICS, CLINICAL PHARMACOLOGY                                                                                                                                                                                                                                                                                                                                                                                                                                                                                                                                                                                                                                                                                                                                              |
|                                 |                                                                                                                                                                                                                                                                                                                                                                                                                                                                                                                                                                                                                                                                                                                                                                                                                                                                 |

SCHOLARONE™  
Manuscripts





I, the Submitting Author has the right to grant and does grant on behalf of all authors of the Work (as defined in the below author licence), an exclusive licence and/or a non-exclusive licence for contributions from authors who are: i) UK Crown employees; ii) where BMJ has agreed a CC-BY licence shall apply, and/or iii) in accordance with the terms applicable for US Federal Government officers or employees acting as part of their official duties; on a worldwide, perpetual, irrevocable, royalty-free basis to BMJ Publishing Group Ltd ("BMJ") its licensees and where the relevant Journal is co-owned by BMJ to the co-owners of the Journal, to publish the Work in this journal and any other BMJ products and to exploit all rights, as set out in our [licence](#).

The Submitting Author accepts and understands that any supply made under these terms is made by BMJ to the Submitting Author unless you are acting as an employee on behalf of your employer or a postgraduate student of an affiliated institution which is paying any applicable article publishing charge ("APC") for Open Access articles. Where the Submitting Author wishes to make the Work available on an Open Access basis (and intends to pay the relevant APC), the terms of reuse of such Open Access shall be governed by a Creative Commons licence – details of these licences and which [Creative Commons](#) licence will apply to this Work are set out in our licence referred to above.

Other than as permitted in any relevant BMJ Author's Self Archiving Policies, I confirm this Work has not been accepted for publication elsewhere, is not being considered for publication elsewhere and does not duplicate material already published. I confirm all authors consent to publication of this Work and authorise the granting of this licence.

1  
2  
3 **The effects of low dose hydrocortisone and hydrocortisone plus**  
4  
5  
6 **fludrocortisone in adults with septic shock: a protocol for a systematic**  
7  
8 **review and meta-analysis of individual participant data**  
9  
10  
11  
12  
13  
14

15 **Registration:**

16  
17  
18 Prospero registration number CRD42017062198  
19  
20  
21  
22

23 **Authors:**

24  
25  
26  
27 Djillali Annane,<sup>1</sup> Romain Pirracchio,<sup>2</sup> Laurent Billot,<sup>3</sup> Andre Waschka,<sup>4</sup> Sylvie Chevret,<sup>5</sup> Jeremy Cohen,<sup>3,6</sup> Simon  
28 Finfer,<sup>3,7,8</sup> Anthony Gordon,<sup>9</sup> Naomi Hammond,<sup>3,7</sup> John Myburgh,<sup>3,10</sup> Balasubramanian Venkatesh,<sup>3,11</sup>  
29 Anthony Delaney<sup>3,7</sup> for the **Utility of Steroids in Septic Shock individual Patient Data Meta-Analysis (ULYSSES**  
30 **IPDMA) Collaborators**  
31  
32  
33  
34  
35  
36

37 **Affiliations:**

- 38  
39 1. Department of Critical Care; Raymond Poincaré Hospital (AP-HP)  
40 Laboratory Infection & Inflammation, U1173, Faculty of Health Science Simone Veil, University of  
41 Versailles SQY- University Paris Saclay – INSERM- FHU SEPSIS; RHU RECORDS, France  
42  
43 2. Department of Anesthesia and Perioperative Medicine; Zuckerberg San Francisco General Hospital and  
44 Trauma Center; University of California San Francisco, USA  
45  
46 3. Division of Critical Care, The George Institute for Global Health, University of New South Wales,  
47 Newtown, Sydney, NSW, Australia,  
48  
49 4. **Department of Statistics, UC Berkeley, USA**  
50  
51 5. Department of Bioinformatics and Statistics, hôpital Saint Louis (AP-HP), University of Paris, Paris, France  
52  
53 6. Royal Brisbane and Women' Hospital, Brisbane, Queensland, Australia  
54  
55  
56  
57  
58  
59  
60

- 1
- 2
- 3 7. Malcolm Fisher Department of Intensive Care Medicine, Royal North Shore Hospital, St. Leonards, NSW,
- 4 Australia
- 5
- 6
- 7 8. School of Public Health, Imperial College London, London UK
- 8
- 9 9. Division of Anaesthetics, Pain Medicine and Intensive Care, Imperial College London, London UK
- 10
- 11 10. University of New South Wales, St. George Clinical School, Sydney, NSW, Australia
- 12
- 13 11. The Princess Alexandra Hospital, Brisbane, Queensland, Australia
- 14
- 15
- 16
- 17
- 18
- 19

### Correspondence :

Djillali Annane

104 Boulevard Raymond Poincaré

92380 Garches

France

E-mail: [djillali.annane@aphp.fr](mailto:djillali.annane@aphp.fr)

**Word count:** 3994

### Author contributions:

DA is the guarantor of the study. DA and RP were responsible for the conception of the study. DA and AD made substantial contributions to the conception and design of the study, drafting of the study protocol, substantial contributions to the analysis plan, revising the work critically for important intellectual content and providing approval for the final version to be published. LB and RP made substantial contributions to the trial design and analytical plan, revising the work critically for important intellectual content and provided approval for the final version to be published. SC, AW, JC, SF, AG, NH, JM and BV made substantial contributions to the drafting of

1  
2  
3 the study protocol, revised the work critically for important intellectual content and provided approval for the  
4  
5 final version to be published.  
6  
7  
8  
9

### 10 **Ammendments:**

11  
12  
13 Version 1.0 dated 8 April, 2020  
14  
15  
16  
17  
18

### 19 **Funding:**

20  
21  
22 This research is part of FHU SEPSIS and RHU RECORDS, which are funded by the French government through  
23  
24 the Programme d'Investissements d'Avenir, project number ANR-18-RHUS60004. This research received no  
25  
26 specific grant from any agency in the commercial or not-for-profit sectors. The trial is funded by in-kind support  
27  
28 from University of Versailles SQY- University Paris Saclay, the Imperial NIHR Biomedical Research Centre and  
29  
30 the Division of Critical Care, The George Institute for Global Health. Funding sources will have no influence on  
31  
32 data handling or analyses or writing of the manuscript but will be acknowledged in the principal manuscript.  
33  
34  
35  
36  
37  
38  
39  
40  
41  
42  
43  
44  
45  
46  
47  
48  
49  
50  
51  
52  
53  
54  
55  
56  
57  
58  
59  
60

## Abstract

### Introduction

The benefits and risks of low dose hydrocortisone in patients with septic shock have been investigated in numerous randomized controlled trials and trial-level meta-analyses. Yet, the routine use of this treatment remains controversial. To overcome the limitations of previous meta-analyses inherent to the use of aggregate data, we will perform an individual patient data meta-analysis (IPDMA) on the effect of hydrocortisone with or without fludrocortisone compared to placebo or usual care on 90-day mortality and other outcomes in patients with septic shock.

### Methods and analysis

To assess the benefits and risks of hydrocortisone, with or without fludrocortisone for adults with septic shock, we will search major electronic databases from inception to September 2020 (Cochrane Central Register of Controlled Trials-CENTRAL, MEDLINE, EMBASE and Latin American Caribbean Health Sciences Literature-LILACS), complimented by a search for unpublished trials. The primary analysis will compare hydrocortisone with or without fludrocortisone to placebo or no treatment in adult patients with septic shock. Secondary analyses will compare hydrocortisone to placebo (or usual care), hydrocortisone plus fludrocortisone to placebo (or usual care), and hydrocortisone versus hydrocortisone plus fludrocortisone. The primary outcome will be all cause mortality at 90-day. We will conduct both one-stage IPDMA using mixed-effect models and machine learning with targeted maximum likelihood analyses. We will assess the risk of bias related to unshared data and related to the quality of individual trial.

### Ethics and dissemination

This individual patient data meta-analysis will use existing data from completed randomized clinical trials and will comply with the ethical and regulatory requirements regarding data sharing for each of the component trials. The findings of this study will be submitted for publication in a peer-review journal with straightforward policy for open access.

1  
2  
3 The protocol for this systematic review has been registered on PROSPERO on April 6<sup>th</sup> 2017  
4  
5  
6  
7

8 **Key words:**  
9

10  
11 adults – septic shock – corticosteroids - machine learning – individual patient data meta-analysis  
12  
13  
14  
15  
16  
17  
18  
19  
20  
21  
22  
23  
24  
25  
26  
27  
28  
29  
30  
31  
32  
33  
34  
35  
36  
37  
38  
39  
40  
41  
42  
43  
44  
45  
46  
47  
48  
49  
50  
51  
52  
53  
54  
55  
56  
57  
58  
59  
60

For peer review only

## Article Summary

### Strengths and limitations of this study

- This will be to the best of our knowledge the first individual-patient data meta-analysis on the use of hydrocortisone with or without fludrocortisone for septic shock.
- The use of individual patient data will allow estimation of subgroup effects based on patient level covariates.
- The analysis will provide the best assessment with currently available data on whether hydrocortisone with or without fludrocortisone confers benefits to patients with septic shock and to assess whether there is an optimal regimen for administration.
- The main limitations are regulatory barriers in accessing individual data from original trials, and technical barriers to combining individual patient data from the component trials.

## Introduction

### Rationale

Septic shock is a global health priority.<sup>1</sup> In 2017, there were about 49 million incident cases of sepsis worldwide and 11 million sepsis-related deaths, representing roughly one out of five of all global deaths.<sup>2</sup> There is a need for improved treatments for this unacceptably high mortality rate. The Surviving Sepsis Campaign<sup>3</sup> recommend that, in the first hour of sepsis recognition, physicians obtain blood cultures, administer broad-spectrum antibiotics, start appropriate fluid resuscitation, and begin vasopressors whenever needed. Beyond these core measures, there has been little change in the management of sepsis.

What has changed in recent years, has been the understanding that dysregulation of the host response to infection is key to understanding the pathophysiology of septic shock.<sup>4</sup> This dysregulated host response may be a therapeutic target to improve mortality in patients with septic shock. As early as the 1950s, physicians have used corticosteroids with clinical success in patients with severe infection not responding to antibiotic treatment.<sup>5</sup> Seventy years later, their use in the management of sepsis remains controversial. The fourth revision of the Surviving Sepsis Campaign guidelines suggested against the use of hydrocortisone except in patients poorly responsive to fluids and vasopressors.<sup>3</sup> Since this revision of the guidelines, two major trials have substantially contributed to the understanding of the benefits and risks of corticosteroids for adults with septic shock.<sup>6,7</sup> Both trials used a daily intravenous dose of 200 mg hydrocortisone for seven days without taper-off. The main differences in the trials' design included continuous infusion of hydrocortisone<sup>7</sup> versus intravenous bolus every 6 hours,<sup>6</sup> hydrocortisone alone<sup>7</sup> versus with fludrocortisone,<sup>6</sup> unspecified vasopressor-dependency<sup>7</sup> versus requirement for a minimal dose of  $\geq 0.25 \mu\text{g}/\text{kg}/\text{min}$  or  $\geq 1\text{mg}/\text{h}$  norepinephrine/epinephrine,<sup>6</sup> and unspecified ventilator-dependency<sup>7</sup> versus need for mechanical ventilation.<sup>6</sup> These trials found similar benefits in terms of resolution of shock and organs dysfunction, of accelerating weaning off mechanical ventilation and reducing length of stay in the intensive care unit. They also found no evidence for serious adverse complications with corticosteroids. A mortality benefit with corticosteroids was only reported in APROCCHSS trial<sup>7</sup> but not in ADRENAL.<sup>6</sup>



1  
2  
3 Since 2018, eight trial-level meta-analyses have addressed the effects of corticosteroids in sepsis.<sup>8-15</sup> They have  
4 different designs including differences in trials eligibility criteria, search strategies and in statistical models. The  
5 number of included trials ranged from 14 to 61 and the number of participants ranged from 6,935 to 12,192.  
6  
7 The relative risk (RR) of death in the short-term varied from 0.90 to 0.98, and the upper limit of the 95%  
8 confidence interval varied from 0.98 to 1.08. The magnitude and direction of the pooled RR of dying in the  
9 short-term were consistent across these meta-analyses in favoring corticosteroids but differed mainly by the  
10 presence of some imprecision in the point estimate. More recent meta-analyses found substantial  
11 heterogeneity in the results possibly explained by differences in type of participants (e.g. all ages versus adults  
12 only, all sepsis severity versus only septic shock or community-acquired pneumonia or sepsis and ARDS, and in  
13 treatments administration (hydrocortisone versus synthetic glucocorticoids, low versus high dose, short versus  
14 long course). Intravenous administration of hydrocortisone may be the most frequent prescribed regimen and  
15 people may use this drug in sepsis with or without shock.<sup>16</sup> A noteworthy limitation of these meta-analyses is  
16 the use of aggregate data, limiting the opportunity to harmonize outcome definitions across trials, adjust the  
17 estimated treatment effect on potential confounders and investigate different subgroups.  
18  
19  
20  
21  
22  
23  
24  
25  
26  
27  
28  
29  
30  
31  
32

33 To address this significant drawback of earlier meta-analyses, we will perform a systematic review and  
34 individual patient data meta-analysis (IPDMA) from trials to assess the effect of intravenous hydrocortisone  
35 with or without fludrocortisone, compared to placebo or usual care on 90-day mortality and other outcomes in  
36 patients with septic shock.  
37  
38  
39  
40  
41  
42  
43  
44  
45  
46

## 47 Objectives

48  
49  
50 The primary objective of this IPDMA is to assess the effect on 90-day mortality of intravenous hydrocortisone  
51 therapy, with or without fludrocortisone, compared to placebo or usual care, in adults with septic shock.  
52  
53

54 Other objectives of this IPDMA include:

- 55 • To compare the effect on 90-day mortality of intravenous hydrocortisone therapy with or without  
56 fludrocortisone, for differing modes of hydrocortisone therapy;
  - 57 ○ Bolus compared to continuous infusion
  - 58
  - 59
  - 60

- Tapered dosing compared to abrupt discontinuation
- Duration of treatment at full dose : fixed duration versus based on vasopressor-dependency
- To compare the effects of intravenous hydrocortisone therapy with or without fludrocortisone in adults with septic shock on secondary outcomes including 28-day and 180-day mortality, requirement for, and duration of organ support, resources utilization as measured by ICU and hospital length of stay, and serious adverse events.
- To compare the effect on 90-day mortality of intravenous hydrocortisone therapy with or without fludrocortisone in adults with septic shock in clinically important subgroups defined by;
  - age
  - sex
  - vasopressor-dependency
  - vasopressin administration
  - predicted mortality
  - SOFA score
  - arterial lactate concentrations and
  - etomidate exposure

## Methods and analysis

This protocol follows the recommendations from the EQUATOR network statement on Preferred Reporting Items for Systematic Reviews and Meta-Analyses Protocols (PRISMA-P)<sup>17</sup> and will allow the report of the completed study to comply with reporting items recommended in the PRISMA of Individual Participant Data (PRISMA IPD).<sup>18</sup>

## Eligibility Criteria

### Types of studies

1  
2  
3 We will consider only randomized trials. We will exclude quasi-randomized trials, trials with a crossover design  
4  
5 or those for which the unit of randomization is not the patient. We will only include trials, which received an  
6  
7 appropriate approval from a research ethics committee and where there was an appropriate method of  
8  
9 obtaining consent.  
10

### 11 12 **Types of participants**

13  
14  
15 We will consider trials that have included adults with sepsis or septic shock as defined in original studies. Trials  
16  
17 of mixed population will be eligible whenever separate information will be available for the subset of patients  
18  
19 with septic shock as defined in original studies. We will exclude trials in children or those performed in patients  
20  
21 without sepsis.  
22  
23

### 24 25 **Types of interventions and controls**

26  
27  
28 We will consider trials in which the experimental intervention was intravenous hydrocortisone at a maximal  
29  
30 daily dose of 400mg for at least 72 hours at full dose, whether given as intermittent bolus or as a continuous  
31  
32 infusion, and whether tapered off or not. We will also consider trials that have investigated the combination of  
33  
34 intravenous hydrocortisone and oral (or enteral) fludrocortisone. We will consider trials in which the  
35  
36 comparator was a placebo, no treatment, or hydrocortisone alone when the experimental intervention was the  
37  
38 combination of hydrocortisone to fludrocortisone. We will also consider trials that compared two doses of  
39  
40 hydrocortisone or bolus versus continuous administration.  
41

42 We will exclude trials that have investigated

- 43  
44 1) corticosteroids other than hydrocortisone or fludrocortisone,
- 45  
46 2) dosage of hydrocortisone higher than 400mg per day,
- 47  
48 3) duration of hydrocortisone of less than 72 hours at full dose,
- 49  
50 4) oral route of hydrocortisone.  
51

52 We will also exclude trials for when we are unable to contact the primary author and/or sponsor or they refuse  
53  
54 to share data. Nevertheless, in case of non-response or refusal, we will use published aggregated data and  
55  
56 combine them to the IPDMA results in a sensitivity analysis, as described in the statistical plan.  
57  
58  
59  
60

## Types of outcome measures

We will only consider trials for inclusion in this review that have information on crude mortality rates at any time point post randomisation.

## Information sources

We will attempt to identify all relevant studies regardless of language or publication status (published, unpublished, in press, in progress). We will use the strategy of the recently completed Cochrane systematic review on the use of corticosteroids in sepsis.<sup>9</sup>

We will search the Cochrane Central Register of Controlled Trials (CENTRAL; 2020 Issue 9) using the search terms 'sepsis', 'septic shock', 'steroids' and 'corticosteroids'. We will also search (up to September 2020) MEDLINE, EMBASE and Latin American Caribbean Health Sciences Literature (LILACS) using the topic search terms in combination with the search strategy for identifying trials developed by The Cochrane Collaboration (Appendix 1).<sup>19</sup>

We will check the reference lists of all trials identified by these methods, and we will contact study authors to request individual published or unpublished data. We also will search the proceedings of annual meetings of major critical care medicine symposia, that is, Society of Critical Care Medicine (1998 to 2020), American Thoracic Society (1998 to 2020), International Symposium on Intensive Care and Emergency Medicine (1998 to 2020), American College of Chest Physicians and European Society of Intensive Care Medicine (1998 to 2020).

## Search strategy

The full search strategy is available in Appendix 1

## Study records

## Selection processes and data management

1  
2  
3 We will perform all screening in duplicate with disagreements resolved by consensus and third-party  
4 adjudication when consensus could not be reached. After implementation of the search strategy, reviewers will  
5 work in pairs to screen all potentially relevant citations and references. Screening will be performed in two  
6 stages, initially reviewing titles and abstracts, and then full text for possibly relevant manuscripts. We will  
7 capture reasons for exclusion.  
8  
9  
10  
11  
12

### 13 **Obtaining individual patient data**

14  
15  
16  
17  
18 One reviewer (DA) will contact the primary author and/or sponsor of all selected trials for potential agreement  
19 to share de-identified individual patient data from their trial for the purpose of this patient-level meta-analysis.  
20 They will define whether data will be freely available or only after application to and approval by a learned  
21 intermediary and whether we will require a data use agreement. In case of non-response or refusal, we will use  
22 published aggregated data and combine them to the IPDMA results in a sensitivity analysis. Data will be stored  
23 on a secure server hosted by University of Versailles SQY.  
24  
25  
26  
27  
28  
29  
30

### 31 **Data extraction and management**

32  
33  
34 Two reviewers (RP and DA) will independently check data supplied for included trials for missing data, internal  
35 data consistency, randomization integrity (balance of patient characteristics at randomisation, pattern of  
36 randomisation), follow-up and censoring pattern. We will check summary tables with the trial protocol and  
37 latest trial report or publication. We will solve any discrepancies or unusual patterns with the study  
38 investigator. We will return a final copy of the form from each trial to the appropriate trial investigator for  
39 verification.  
40  
41  
42  
43  
44  
45  
46  
47  
48  
49

### 50 **Data items**

51  
52  
53 Specifically, with regards to the population of patients for the primary analysis, these will be adult patients with  
54 septic shock. Adults will be those 18 years or older at time of randomization. Septic shock will be defined  
55 according to the definition used in each clinical trial. Each included patient will meet at least one of the  
56 following criteria  
57  
58  
59  
60

- 1
- 2
- 3 1. Systolic blood pressure <100 mmHg or mean arterial pressure <65 mm Hg after fluid resuscitation
- 4
- 5 2. Lactate > 2mmol/L
- 6
- 7 3. Requirement for vasopressors to maintain an adequate blood pressure.
- 8

9 The intervention of interest is hydrocortisone, administered intravenously at a dose of less than 400mg per  
10 day, either in divided bolus doses, or as a continuous infusion. We will record the dose, the mode of  
11 administration, the duration of administration, and the mode of cessation, either tapered, or abruptly ceased.

12 We will record whether fludrocortisone was administered, the dose and duration of administration. The details  
13 of the comparison group, either placebo or standard care will be recorded.  
14

## 15 Outcomes and prioritization

16 The primary outcome measure for this meta-analysis will be 90-day all-cause mortality.

17 Secondary outcomes will include:

- 18 • All-cause mortality at ICU and hospital discharge, at 28 days and at 180 days,
- 19 • Time to resolution of organ failure (defined as a SOFA < 4), time to vasopressor withdrawal, and time  
20 to cessation of mechanical ventilation. We will also calculate organ-failure/vasopressor/mechanical  
21 ventilation free days (up to 28 day). Event free days will be calculated as the number of days alive  
22 from randomisation to day 28 and having a SOFA score<4, being off vasopressors, off mechanical  
23 ventilation. When death occurred before reaching a SOFA<4 or before being off vasopressor or  
24 mechanical ventilation, the number of event-free days will be zero. For these outcomes, we will  
25 consider only the first episode. Recovery from organ failure will be defined by a SOFA score<4 for at  
26 least 24 hours. Weaning from vasopressor will be defined by being off any dose of  
27 vasopressor/inotrope for at least 24 consecutive hours. Weaning from mechanical ventilation will be  
28 defined by being off any mode of respiratory support for at least 24 hours.
- 29 • Length of stay in the ICU and in the hospital,
- 30 • Superinfection, as defined by any new infection occurring >48 hours after randomization,
- 31 • Number of days with hyperglycaemia defined as, at least one episode of blood glucose levels  
32 >180mg/dl in the corresponding 24 hours,  
33  
34  
35  
36  
37  
38  
39  
40  
41  
42  
43  
44  
45  
46  
47  
48  
49  
50  
51  
52  
53  
54  
55  
56  
57  
58  
59  
60

- Number of days with hypernatremia, defined as at least one episode of serum sodium concentration >150mmol/L in the corresponding 24 hours,
- Bleeding complications: gastroduodenal defined as any episode of gastroduodenal bleeding reported by the investigators of original studies, regardless the need for transfusion or haemostatic intervention
- Critical illness associated muscle weakness at the longest follow-up as defined in individual trials

### **Risk of bias in individual studies**

Risk of bias will be assessed, independently and in duplicate, for each of the individual studies using a modified Cochrane risk of bias tool<sup>20</sup> that classifies risk of bias as “low”, “probably low”, “probably high”, or “high” for each of the following domains: sequence generation, allocation sequence concealment, blinding, selective outcome reporting and other bias. We will rate the overall risk of bias as the highest risk attributed to any criterion. Reviewers will not contribute to risk of bias assessment for trials in which they have participated.

### **Data synthesis**

Baseline patient characteristics will be presented by study and treatment group. For continuous variables, mean and standard deviation (SD) or median and interquartile range (IQR) will be reported, as appropriate. For categorical variables, the number of observations in each category and corresponding proportions will be reported. Patient characteristics across groups will be contrasted using nonparametric Kruskal-Wallis tests for continuous variables and chi-square or Fisher exact tests for categorical variables. Since earlier and later deaths may stem from qualitatively different processes, to provide a more comprehensive depiction of mortality, length of stay in the ICU or in the hospital will be reported in the overall population as well as in the subpopulation of survivors at day 90. All tests will be two-sided and conducted at significance level 0.05. No formal adjustment for multiple testing will be undertaken. Given the number of secondary outcomes and subgroup analyses to be performed, interpretation of p-values, beyond the primary outcome, will be undertaken very cautiously.

## Data analysis

We will consider as the primary analysis, the comparison between hydrocortisone (with or without fludrocortisone) and placebo (or no treatment) on 90-day mortality for patients with septic shock, Pre-specified secondary analyses will include all possible pairwise comparisons, namely, hydrocortisone versus placebo, hydrocortisone plus fludrocortisone versus placebo, hydrocortisone plus fludrocortisone versus hydrocortisone.

In order to increase the robustness of the results, we will perform two different statistical approaches, i.e. a one stage conventional meta-analysis and machine-learning targeted maximum likelihood analysis.

As suggested by different studies comparing one-stage to two-stage approaches<sup>21 22</sup> the conventional will be performed using a one-stage meta-analysis. In one-stage meta-analysis, all data from all studies are aggregated and the primary outcome is analyzed simultaneously by adopting a single statistical model that accounts for potential heterogeneity across studies.<sup>23</sup> Analyses will rely on generalized linear mixed effect models (GLMM) where both the intercept and the treatment effect will be treated as random variables with the study as the subject (i.e. a random study intercept and a random study-by-treatment interaction). For the primary outcome and for binary secondary outcomes, we will use a GLMM with a logit link function.

Continuous secondary outcomes will be analysed using a GLMM with an identity link function. Our estimates of the average treatment effect will be adjusted for study (random effect), age, predicted mortality from SAPS2 or APACHE 2, SOFA, admission type (medical, elective surgery or emergent surgery), infection site infection type (hospital versus community acquired infection) and type of pathogen, baseline and increment in cortisol levels post corticotrophin, lactate levels, and need for mechanical ventilation (fixed effects). A study-by-treatment interaction term will be also be included in the model. For withdrawal of vasopressor therapy, withdrawal of mechanical ventilation, and recovery from organ failure (defined by a SOFA score <4 for at least 24 hours), cumulative event incidences will be estimated using a nonparametric estimator and will be compared using Gray's test, with death treated as a competing risk<sup>24</sup> and study used as random effect.<sup>25</sup> We will not adjust for multiple testing and consider findings from analyses other than the primary analysis of the primary outcome, as of exploratory nature.<sup>26-28</sup>

We will also estimate the average treatment effect via a more flexible estimator, namely the targeted maximum likelihood estimator (TMLE).<sup>29</sup> In this analysis, different portions of the likelihood will be modelled



1  
2  
3 using Super Learner and combined to produce a plug-in estimator of the average treatment effect that is  
4 consistent, double robust and asymptotically linear. We will use a Super Learner with a large library including  
5 logistic regression models, stepwise regression models based on the Akaike information criterion, mixed  
6 logistic models with random effect to account for study-level and patient-level heterogeneity, multivariate  
7 adaptive regression splines, random forests, Bayesian generalized linear models, elastic net regularized  
8 generalized linear models, and gradient boosting, to estimate flexibly the relationship between mean outcome  
9 and covariates. For the pairwise comparisons between combinations of hydrocortisone, fludrocortisone and  
10 placebo, we will use network meta-analysis techniques<sup>30</sup> to assess the robustness of the results.  
11  
12 For binary outcomes, we will describe the average treatment effect using risk ratio (RR) or odds ratio (OR)  
13 estimate along with corresponding 95% CI and p-value. For continuous outcomes, we will describe the average  
14 treatment effect using mean difference (MD) estimate along with a corresponding 95% CI and p-value. We will  
15 test for qualitative interaction between treatment effect and subgroup of interest using the Gail and Simon  
16 interaction test.<sup>31</sup>  
17  
18  
19  
20  
21  
22  
23  
24  
25  
26  
27  
28  
29  
30  
31  
32

### 33 **Subgroup analysis**

34  
35  
36 We will perform, if data permit, the following subgroup analyses:

- 37  
38 • We will examine treatment effect in the subgroup of patients meeting sepsis or septic shock criteria  
39 according to Sepsis 3 definition<sup>4</sup>;
  - 40  
41 • We will also examine any variation in response to treatment according to baseline prognosis factors  
42 including  
43
    - 44 ○ age (by quartiles),
    - 45 ○ sex,
    - 46 ○ vasopressor-dependency (yes versus no, and by quartiles of baseline dose),
    - 47 ○ vasopressin administration (yes or no),
    - 48 ○ predicted mortality from SAPSII or APACHEII (by quartiles),
    - 49 ○ SOFA score and each of its component (by quartiles),
    - 50 ○ arterial lactate levels (by quartiles) and
- 51  
52  
53  
54  
55  
56  
57  
58  
59  
60

- etomidate-free versus etomidate-exposed patients
- appropriate antibiotic treatment
- We will examine any variation in treatment response according to patient's adrenal status, i.e. responders to standard corticotrophin test (those whom stimulated cortisol levels increased by >9µg/dL from baseline value) versus non-responders to corticotrophin test,
- We will examine any variation in treatment response according to pre-existing conditions other than sepsis that are likely to be associated with altered hypothalamic-pituitary adrenal axis,
- We will examine any variation in treatment response according to timing of hydrocortisone initiation, i.e. within 24hours versus >24 hours of meeting trial's criteria of shock, and
- we will examine any variation in response to treatment according to infection characteristics, i.e.
  - community versus hospital acquired,
  - medical vs. surgical, lung versus other sources of infection, and
  - gram negative versus gram positive versus polymicrobial.

### Methods to assess bias

We will assess for the potential for publication bias or small study bias by inspection of funnel plots and the use of Egger's test. The potential bias introduced by the studies that could not be included in the analyses will be evaluated<sup>32</sup> by performing a two-stage meta-analysis aggregating the results obtained on shared data and treatment effect estimates published for unshared data, if data permit. Specifically, the available IPD will first be reduced to aggregated data using the modelling methods described above. Then, these aggregated data will be pooled with published aggregated data into a weighted average.<sup>33 34</sup> Heterogeneity will be assessed by using an estimate of Tau<sup>2</sup> generated from the one stage and two-stage models.

### Confidence in cumulative evidence

We will present a summary of results and recommendations in accordance with the GRADE approach to assess the overall quality of the evidence.<sup>35 36</sup>

### **Patient and Public involvement:**

This protocol is under review by sepsis survivors and stakeholders from the Australian Sepsis Network.<sup>37</sup>

## **Ethics and Dissemination**

### **Ethics**

This planned IPDMA will use existing data from completed randomized controlled trials, reporting explicitly ethical approval of the original protocol and the process for obtaining patients consent.

### **Publications Plan:**

We will report the findings according to the PRISMA-IPD statement.<sup>18</sup> We will share the findings from this IPDMA with primary authors and sponsors of included trials prior to submitting the results of this primary analysis for publication.

- 1.** The study protocol including the statistical analysis plan will be published prior to publishing the results of the primary analysis
- 2.** Upon completion of the primary analysis, the main manuscript will be submitted to one of the major clinical journals regardless of the results.
- 3.** Sub-studies, as approved by the Executive Committee, can be published after the publication of the primary analysis. The Executive Committee will grant authorship depending on personal input but shall include appropriate acknowledgment of the included trials, site Investigators and the Clinical Trials Groups where appropriate.

### **Authorship Guidance:**

1  
2  
3 In keeping with the ICMJE guidance (<http://www.icmje.org/recommendations/browse/roles-and-responsibilities/defining-the-role-of-authors-and-contributors.html>), authors shall meet the following 4 criteria:  
4  
5  
6  
7 Substantial contributions to the conception or design of the work; or the acquisition, analysis, or interpretation  
8  
9 of data for the work; AND

- 10
- 11 • Drafting the work or revising it critically for important intellectual content; AND
- 12
- 13 • Final approval of the version to be published; AND
- 14
- 15 • Agreement to be accountable for all aspects of the work in ensuring that questions related to the
- 16 accuracy or integrity of any part of the work are appropriately investigated and resolved
- 17
- 18
- 19

### 20 21 **Authorships specifics:**

22  
23  
24 For the principal publication the study will be conducted in the name of the **Utility of Steroids in Septic Shock**  
25 (ULYSSES) IPDMA investigators and acknowledge the included studies, and where appropriate, the Clinical  
26 Trials Groups. Where individuals' name is required for publication (e.g.: publication mast) the listing of authors  
27 will be as follows: Prof Romain Pirracchio will be the first author, Prof Djillali Annane will be the second (listed  
28 as co-first) and corresponding author, followed by members of the writing committee, with Associate Professor  
29 Delaney as the senior author. The writing committee shall comprise the included trials' chief investigators and  
30 members of the executive committee who have contributed substantially to one or more of: trial design or  
31 management, or data analysis and meet the ICMJE criteria for authorship.<sup>38</sup>  
32  
33  
34  
35  
36  
37  
38  
39  
40  
41

### 42 **Discussion**

43  
44 This IPDMA will provide the highest level of evidence about the benefit and risk of hydrocortisone therapy for  
45 adults with septic shock.<sup>39 40</sup> This collaborative group includes most of the principal investigators of trials on  
46 hydrocortisone for sepsis/septic shock, reducing the risk of sharing refusal. In contrast to trial-level meta-  
47 analyses, this IPDMA will permit clarifying the role of fludrocortisone and identifying the optimal modalities for  
48 corticosteroids administration in septic shock. In addition, it will help identifying subgroups of patients more  
49 likely to benefit from corticosteroids and those at high risk of harm. Finally, we will use the one-stage analysis  
50 and a machine learning with targeted maximum likelihood analysis (TMLE).<sup>29</sup> TMLE may reduce bias and  
51 increase efficiency and power when applied to treatment effect estimation in trials.<sup>41</sup> TMLE requires to model  
52  
53  
54  
55  
56  
57  
58  
59  
60

1  
2  
3 separately different parts of the likelihood. A wide variety of flexible regression algorithms including mixed-  
4  
5 effect models may help mitigating the risk of model misspecification associated with standard regression  
6  
7 approaches. The Super Learner (SL)<sup>42</sup> is an ensemble machine-learning algorithm that automatically constructs  
8  
9 an optimal weighted combination estimator based on a collection of supplied candidate estimators. The SL  
10  
11 yields an estimator that is mathematically guaranteed to perform essentially as well as or better than the best  
12  
13 candidate among the ones it is built upon – this is significant since in practice which of the candidate estimators  
14  
15 behaves best in a given problem and dataset is not known to the analyst.<sup>42</sup> In the context of IPDMA, as  
16  
17 compared to GLMM, this approach may avoid any strong assumption about the functional form of the  
18  
19 relationship between outcome and explanatory variables. It may help leverage the advantages of all candidate  
20  
21 learners such as GLMM. Finally, it may allow accounting for potential high-order interactions by including in the  
22  
23 library highly flexible algorithms such as random forests. In this analysis, different portions of the likelihood will  
24  
25 be modelled using SL and combined to produce a plug-in estimator of the average treatment effect that is  
26  
27 consistent, double robust and asymptotically linear.  
28  
29  
30

### 31 **Acknowledgment**

32  
33 We would like to thank the primary authors and sponsors that have provided access to their trial's database.  
34  
35  
36

### 37 **Conflict of interest**

38  
39 Djillali ANNANE: has received funding from French government to conduct trials that will be included in this  
40  
41 systematic review (trials acronym: Ger-Inf-05; COITSS, APROCCHS) – he received funding for FHU SEPSIS and  
42  
43 RHU RECORDS research programs. The current IPDMA he was responsible for the Cochrane systematic review  
44  
45 on corticosteroids for sepsis in children and adults, and this work will use part of data obtained in the Cochrane  
46  
47 review.  
48

49 Romain PIRRACCHIO : no conflict of interest

50 Laurent BILLOT : no conflict of interest

51 André WASCHKA : no conflict of interest

52 Sylvie CHEVRET : no conflict of interest

53 Jeremy COHEN: no conflict of interest

54 Simon FINFER: no conflict of interest  
55  
56  
57  
58  
59  
60

1  
2  
3 Anthony C. GORDON: has received funding from an NIHR Research Professorship (RP-2015-06-18),  
4 consulting fees paid to his institution from GlaxoSmithKline and Bristol Myers Squibb, and personal  
5 consulting fees from Baxter Healthcare  
6

7  
8 Naomi HAMMOND: no conflict of interest  
9

10 John MYBURGH: no conflict of interest  
11

12 Balasubramanian VENKATESH: no conflict of interest  
13

14 Anthony DELANEY: no conflict of interest  
15  
16

### 17 **Data statements**

18  
19 Data may be accessed only by written request to the primary author of individual studies that will be included  
20  
21 in this individual patient data meta-analysis.  
22  
23  
24  
25  
26  
27  
28  
29  
30  
31  
32  
33  
34  
35  
36  
37  
38  
39  
40  
41  
42  
43  
44  
45  
46  
47  
48  
49  
50  
51  
52  
53  
54  
55  
56  
57  
58  
59  
60

## Reference

1. Reinhart K, Daniels R, Kissoon N, et al. Recognizing Sepsis as a Global Health Priority - A WHO Resolution. *The New England journal of medicine* 2017;377(5):414-17. doi: 10.1056/NEJMp1707170 [published Online First: 2017/06/29]
2. Rudd KE, Johnson SC, Agesa KM, et al. Global, regional, and national sepsis incidence and mortality, 1990-2017: analysis for the Global Burden of Disease Study. *Lancet* 2020;395(10219):200-11. doi: 10.1016/s0140-6736(19)32989-7 [published Online First: 2020/01/20]
3. Rhodes A, Evans LE, Alhazzani W, et al. Surviving Sepsis Campaign: International Guidelines for Management of Sepsis and Septic Shock: 2016. *Intensive care medicine* 2017;43(3):304-77. doi: 10.1007/s00134-017-4683-6 [published Online First: 2017/01/20]
4. Singer M, Deutschman CS, Seymour CW, et al. The Third International Consensus Definitions for Sepsis and Septic Shock (Sepsis-3). *Jama* 2016;315(8):801-10. doi: 10.1001/jama.2016.0287 [published Online First: 2016/02/24]
5. Kinsell LW, Boling L, Partridge JW, et al. Corticotropin (ACTH) and cortisone; newer concepts of their use in clinical practice. *Calif Med* 1953;78(6):487-90. [published Online First: 1953/06/01]
6. Annane D, Renault A, Brun-Buisson C, et al. Hydrocortisone plus Fludrocortisone for Adults with Septic Shock. *The New England journal of medicine* 2018;378(9):809-18. doi: 10.1056/NEJMoa1705716 [published Online First: 2018/03/01]
7. Venkatesh B, Finfer S, Cohen J, et al. Adjunctive Glucocorticoid Therapy in Patients with Septic Shock. *The New England journal of medicine* 2018;378(9):797-808. doi: 10.1056/NEJMoa1705835 [published Online First: 2018/01/20]
8. Allen JM, Feild C, Shoulders BR, et al. Recent Updates in the Pharmacological Management of Sepsis and Septic Shock: A Systematic Review Focused on Fluid Resuscitation, Vasopressors, and Corticosteroids. *Ann Pharmacother* 2019;53(4):385-95. doi: 10.1177/1060028018812940 [published Online First: 2018/11/09]

- 1  
2  
3 9. Annane D, Bellissant E, Bollaert PE, et al. Corticosteroids for treating sepsis in children and adults. *Cochrane*  
4 *Database Syst Rev* 2019;12:Cd002243. doi: 10.1002/14651858.CD002243.pub4 [published Online First:  
5 2019/12/07]  
6  
7  
8  
9  
10 10. Fang F, Zhang Y, Tang J, et al. Association of Corticosteroid Treatment With Outcomes in Adult Patients  
11 With Sepsis: A Systematic Review and Meta-analysis. *JAMA internal medicine* 2019;179(2):213-23. doi:  
12 10.1001/jamainternmed.2018.5849 [published Online First: 2018/12/24]  
13  
14  
15  
16 11. Lin LL, Gu HY, Luo J, et al. Impact and Beneficial Critical Points of Clinical Outcome in Corticosteroid  
17 Management of Adult Patients With Sepsis: Meta-Analysis and GRADE Assessment. *Front Pharmacol*  
18 2019;10:1101. doi: 10.3389/fphar.2019.01101 [published Online First: 2019/10/15]  
19  
20  
21  
22  
23 12. Ni YN, Liu YM, Wang YW, et al. Can corticosteroids reduce the mortality of patients with severe sepsis? A  
24 systematic review and meta-analysis. *Am J Emerg Med* 2019;37(9):1657-64. doi: 10.1016/j.ajem.2018.11.040  
25 [published Online First: 2018/12/14]  
26  
27  
28  
29 13. Rochweg B, Oczkowski SJ, Siemieniuk RAC, et al. Corticosteroids in Sepsis: An Updated Systematic Review  
30 and Meta-Analysis. *Critical care medicine* 2018;46(9):1411-20. doi: 10.1097/ccm.0000000000003262  
31 [published Online First: 2018/07/07]  
32  
33  
34  
35  
36 14. Rygard SL, Butler E, Granholm A, et al. Low-dose corticosteroids for adult patients with septic shock: a  
37 systematic review with meta-analysis and trial sequential analysis. *Intensive care medicine* 2018;44(7):1003-16.  
38 doi: 10.1007/s00134-018-5197-6 [published Online First: 2018/05/16]  
39  
40  
41  
42  
43 15. Zhou X, Hu C, Yao L, et al. Effect of adjunctive corticosteroids on clinical outcomes in adult patients with  
44 septic shock - a meta-analysis of randomized controlled trials and trial sequential analysis. *J Crit Care*  
45 2018;48:296-306. doi: 10.1016/j.jcrc.2018.09.013 [published Online First: 2018/10/01]  
46  
47  
48  
49 16. Lamontagne F, Quiroz Martinez H, Adhikari NK, et al. Corticosteroid use in the intensive care unit: a survey  
50 of intensivists. *Can J Anaesth* 2013;60(7):652-9. doi: 10.1007/s12630-013-9929-3 [published Online First:  
51 2013/04/23]  
52  
53  
54  
55  
56 17. Shamseer L, Moher D, Clarke M, et al. Preferred reporting items for systematic review and meta-analysis  
57 protocols (PRISMA-P) 2015: elaboration and explanation. *BMJ : British Medical Journal* 2015;349  
58  
59  
60



- 1  
2  
3 18. Stewart LA, Clarke M, Rovers M, et al. Preferred Reporting Items for Systematic Review and Meta-Analyses  
4 of individual participant data: the PRISMA-IPD Statement. *Jama* 2015;313(16):1657-65. doi:  
5  
6 10.1001/jama.2015.3656 [published Online First: 2015/04/29]  
7  
8  
9 19. Higgins JP, Altman DG, Gotzsche PC, et al. The Cochrane Collaboration's tool for assessing risk of bias in  
10 randomised trials. *BMJ (Clinical research ed)* 2011;343:d5928. doi: 10.1136/bmj.d5928 [published Online First:  
11  
12 2011/10/20]  
13  
14  
15 20. Guyatt G, Oxman AD, Sultan S, et al. GRADE guidelines: 11. Making an overall rating of confidence in effect  
16 estimates for a single outcome and for all outcomes. *Journal of clinical epidemiology* 2013;66(2):151-7. doi:  
17  
18 10.1016/j.jclinepi.2012.01.006 [published Online First: 2012/05/01]  
19  
20  
21  
22 21. Kontopantelis E. A comparison of one-stage vs two-stage individual patient data meta-analysis methods: A  
23 simulation study. *Res Synth Methods* 2018;9(3):417-30. doi: 10.1002/jrsm.1303 [published Online First:  
24  
25 2018/05/23]  
26  
27  
28 22. Mathew T, Nordstrom K. Comparison of one-step and two-step meta-analysis models using individual  
29 patient data. *Biom J* 2010;52(2):271-87. doi: 10.1002/bimj.200900143 [published Online First: 2010/03/30]  
30  
31  
32  
33 23. Debray TP, Koffijberg H, Nieboer D, et al. Meta-analysis and aggregation of multiple published prediction  
34 models. *Statistics in medicine* 2014;33(14):2341-62. doi: 10.1002/sim.6080 [published Online First: 2014/04/23]  
35  
36  
37  
38 24. Fine JP, Gray RJ. A Proportional Hazards Model for the Subdistribution of a Competing Risk. *Journal of the*  
39  
40  
41  
42  
43 25. Katsahian S, Resche-Rigon M, Chevret S, et al. Analysing multicentre competing risks data with a mixed  
44 proportional hazards model for the subdistribution. *Statistics in medicine* 2006;25(24):4267-78. doi:  
45  
46 10.1002/sim.2684 [published Online First: 2006/09/09]  
47  
48  
49 26. Rothman KJ. No adjustments are needed for multiple comparisons. *Epidemiology* 1990; 1: 43-46  
50  
51  
52 27. Perneger TV. What's wrong with Bonferroni adjustments. *BMJ* 1998; 315: 1236-1238  
53  
54  
55 28. Feise RJ. Do multiple outcome measures require p-value adjustment?. *BMC Med Res Methodol* 2002; 2: 8  
56  
57  
58 29. van der Laan MJ, Rose S. Targetted Learning. Causal inference for observational and experimental data.  
59 New York: Springer 2011.  
60

- 1  
2  
3 30. Debray TP, Schuit E, Efthimiou O, et al. An overview of methods for network meta-analysis using individual  
4 participant data: when do benefits arise? *Stat Methods Med Res* 2018;27(5):1351-64. doi:  
5  
6 10.1177/0962280216660741 [published Online First: 2016/08/05]  
7  
8  
9 31. Gail M, Simon R. Testing for qualitative interactions between treatment effects and patient subsets.  
10  
11 *Biometrics* 1985;41(2):361-72. [published Online First: 1985/06/01]  
12  
13  
14 32. Ahmed I, Sutton AJ, Riley RD. Assessment of publication bias, selection bias, and unavailable data in meta-  
15 analyses using individual participant data: a database survey. *BMJ (Clinical research ed)* 2012;344:d7762. doi:  
16  
17 10.1136/bmj.d7762 [published Online First: 2012/01/05]  
18  
19  
20 33. Riley RD, Lambert PC, Staessen JA, et al. Meta-analysis of continuous outcomes combining individual  
21 patient data and aggregate data. *Statistics in medicine* 2008;27(11):1870-93. doi: 10.1002/sim.3165 [published  
22  
23 Online First: 2007/12/12]  
24  
25  
26 34. Riley RD, Simmonds MC, Look MP. Evidence synthesis combining individual patient data and aggregate  
27 data: a systematic review identified current practice and possible methods. *Journal of clinical epidemiology*  
28  
29 2007;60(5):431-9. doi: 10.1016/j.jclinepi.2006.09.009 [published Online First: 2007/04/11]  
30  
31  
32 35. Guyatt G, Oxman AD, Akl EA, et al. GRADE guidelines: 1. Introduction-GRADE evidence profiles and  
33 summary of findings tables. *Journal of clinical epidemiology* 2011;64(4):383-94. doi:  
34  
35 10.1016/j.jclinepi.2010.04.026 [published Online First: 2011/01/05]  
36  
37  
38 36. Guyatt GH, Oxman AD, Vist GE, et al. GRADE: an emerging consensus on rating quality of evidence and  
39 strength of recommendations. *BMJ (Clinical research ed)* 2008;336(7650):924-6. doi:  
40  
41 10.1136/bmj.39489.470347.AD [published Online First: 2008/04/26]  
42  
43  
44 37. Australian Sepsis Network Management Committee. Australian Sepsis Network [Available from:  
45  
46 [www.australiansepsisnetwork.net.au](http://www.australiansepsisnetwork.net.au) accessed 8th May 2020.  
47  
48  
49  
50 38. International Committee of Medical Journal Editors. Recommendations for the Conduct, Reporting, Editing  
51 and Publication of Scholarly Work in Medical Journals 2019 [Available from: [http://www.icmje.org/icmje-](http://www.icmje.org/icmje-recommendations.pdf)  
52  
53 [recommendations.pdf](http://www.icmje.org/icmje-recommendations.pdf) accessed 8th May, 2020 2020.  
54  
55  
56  
57  
58  
59  
60

- 1  
2  
3 39. Stewart LA, Parmar MKB. Meta-analysis of the literature or of individual patient data: is there a difference?  
4  
5 *The Lancet* 1993;341(8842):418-22. doi: [https://doi.org/10.1016/0140-6736\(93\)93004-K](https://doi.org/10.1016/0140-6736(93)93004-K)  
6  
7  
8 40. Vale CL, Ryzewska LH, Rovers MM, et al. Uptake of systematic reviews and meta-analyses based on  
9  
10 individual participant data in clinical practice guidelines: descriptive study. *BMJ (Clinical research ed)*  
11  
12 2015;350:h1088. doi: 10.1136/bmj.h1088 [published Online First: 2015/03/10]  
13  
14 41. Moore KL, van der Laan MJ. Covariate adjustment in randomized trials with binary outcomes: targeted  
15  
16 maximum likelihood estimation. *Statistics in medicine* 2009;28(1):39-64. doi: 10.1002/sim.3445 [published  
17  
18 Online First: 2008/11/06]  
19  
20  
21 42. van der Laan MJ, Polley EC, Hubbard AE. Super learner. *Stat Appl Genet Mol Biol* 2007;6:Article25. doi:  
22  
23 10.2202/1544-6115.1309 [published Online First: 2007/10/04]  
24  
25  
26  
27  
28  
29  
30  
31  
32  
33  
34  
35  
36  
37  
38  
39  
40  
41  
42  
43  
44  
45  
46  
47  
48  
49  
50  
51  
52  
53  
54  
55  
56  
57  
58  
59  
60

1  
2  
3 The **Utility of Steroids in Septic Shock individual Patient Data Meta-Analysis (ULYSSES**  
4 **IPDMA) Collaborators**  
5  
6  
7

- 8  
9 - Djillali Annane: Department of Critical Care; Raymond Poincaré Hospital (AP-HP)  
10  
11 Laboratory Infection & Inflammation, U1173, Faculty of Health Science Simone Veil,  
12  
13 University of Versailles SQY- University Paris Saclay – INSERM- FHU SEPSIS; RHU  
14  
15 RECORDS, France  
16  
17  
18 - Yaseen Arabi: Intensive Care Department; Medical Director, Respiratory Services  
19  
20 Professor, College of Medicine King Saud Bin Abdulaziz University for Health  
21  
22 Sciences King Abdulaziz Medical City; Saudi Arabia  
23  
24  
25 - Laurent Billot: The George Institute for Global Health, Faculty of Medicine, University  
26  
27 of New South Wales, Sydney, Australia  
28  
29  
30 - Pierre Edouard Bollaert: Service de Médecine Intensive Réanimation, CHRU de  
31  
32 Nancy, Hôpital Central, 54035 Nancy Cedex, France  
33  
34  
35 - Josef Briegel : Ludwig-Maximilians-Universität München Klinik für Anaesthesiologie  
36  
37 Marchioninstr. München ; Germany  
38  
39  
40 - Sylvie Chevret: Department of Bioinformatics and Statistics, hôpital Saint Louis (AP-  
41  
42 HP), University of Paris, Paris, France  
43  
44  
45 - Jeremy Cohen: The George Institute for Global Health, Sydney. Royal Brisbane and  
46  
47 Women’s Hospital, University of Queensland, Brisbane. The Wesley Hospital, Brisbane.  
48  
49 The University of Queensland  
50  
51  
52 - Anthony Delaney: Division of Critical Care, The George Institute for Global Health,  
53  
54 University of New South Wales, Newtown, Sydney, NSW. Malcolm Fisher Department  
55  
56 of Intensive Care Medicine, Royal North Shore Hospital, St. Leonards, NSW, Australia  
57  
58  
59  
60

- 1  
2  
3 - Naomi Hammond: Division of Critical Care, The George Institute for Global Health,  
4 University of New South Wales, Newtown, Sydney, NSW. Malcolm Fisher Department  
5 of Intensive Care Medicine, Royal North Shore Hospital, St. Leonards, NSW, Australia  
6  
7  
8  
9  
10 - Didier Keh: Oberarzt Klinik für Anästhesiologie m.S. operative Intensivmedizin CCM/ CVK  
11 Canpus Virchow-Klinikum  
12  
13  
14  
15 Berlin; Germany  
16  
17 - Simon Finfer: Division of Critical Care, The George Institute for Global Health,  
18 University of New South Wales, Newtown, Sydney, NSW. Malcolm Fisher Department  
19 of Intensive Care Medicine, Royal North Shore Hospital, St. Leonards, NSW, Australia  
20  
21  
22  
23  
24 - Anthony Gordon: Division of Anaesthetics, Pain Medicine and Intensive Care,  
25 Imperial College London, London UK  
26  
27  
28  
29 - Ling Liu: Department of critical Medicine, Zhong-Da Hospital and school of clinical  
30 Medine, Southeast University, Nanjing 210009, China.  
31  
32  
33  
34 - Umberto G. Meduri: University of Tennessee Health Science Center and Memphis VA  
35 Medical Center, Memphis TN, USA  
36  
37  
38  
39 - Liliana Mirea: Anaesthesia and Intensive Care, Clinical Emergency Hospital of  
40 Bucharest, 2ENT, Elias Clinical Emergency Hospital, Endocrinology, National,  
41 Bucharest, Romania  
42  
43  
44  
45  
46 - John Myburgh: Division of Critical Care, The George Institute for Global Health,  
47 University of New South Wales, Newtown, Sydney, NSW. University of New South  
48 Wales, St. George Clinical School, Sydney, NSW, Australia  
49  
50  
51  
52  
53 - Romain Pirracchio: Department of Anesthesia and Perioperative Medicine; Zuckerberg  
54 San Francisco General Hospital and Trauma Center; University of California San  
55 Francisco, USA  
56  
57  
58  
59  
60

- 1  
2  
3 - Charles L. Sprung: Department of Anesthesiology, Critical Care Medicine and Pain,  
4 Hadassah Hebrew University Medical Center, Jerusalem, Israel  
5  
6  
7  
8 - Nejla Tilouche : Intensive Care Unit, University Hospital Taher Sfar Mahdia 5100,;  
9  
10 University of Monastir, Research Laboratory, Tunisia  
11  
12  
13 - Surat Tongyoo: Faculty of Medicine, Siriraj Hospital, Mahidol University, No. 2,  
14 Prannok Road, Bangkoknoi, Bangkok, 10700, Thailand. [surat\\_ty@yahoo.co.uk](mailto:surat_ty@yahoo.co.uk).  
15  
16  
17 - Balasubramanian Venkatesh: Division of Critical Care, The George Institute for Global  
18 Health, University of New South Wales, Newtown, Sydney, NSW, Australia; The  
19 Princess Alexandra Hospital, Brisbane, Queensland, Australia  
20  
21  
22  
23 - Andre Waschka: Department of Statistics; Zuckerberg San Francisco General Hospital  
24 and Trauma Center; University of California San Francisco, USA  
25  
26  
27  
28 - Ruiqiang Zheng: Department of Critical Care Medicine, the Northern Jiangsu People's  
29 Hospital, Yangzhou 225001, Jiangsu, China.  
30  
31  
32  
33  
34  
35  
36  
37  
38  
39  
40  
41  
42  
43  
44  
45  
46  
47  
48  
49  
50  
51  
52  
53  
54  
55  
56  
57  
58  
59  
60

## Appendix 1: Search strategy

### 1 Search strategy for CENTRAL

#1 MeSH descriptor: [Sepsis] explode all trees

#2 MeSH descriptor: [Shock, Septic] explode all trees

#3 MeSH descriptor: [Systemic Inflammatory Response Syndrome] explode all trees

#4 MeSH descriptor: [Central Nervous System Bacterial Infections] explode all trees and with qualifier(s): [blood - BL, complications - CO, drug therapy - DT]

#5 MeSH descriptor: [Pneumonia] explode all trees

#6 MeSH descriptor: [Community-Acquired Infections] explode all trees and with qualifier(s): [complications - CO, drug therapy - DT]

#7 MeSH descriptor: [Respiratory Distress Syndrome, Adult] explode all trees and with qualifier(s): [complications - CO, drug therapy - DT]

#8 MeSH descriptor: [Acute Lung Injury] explode all trees and with qualifier(s): [complications - CO, drug therapy - DT]

#9 sepsis or (septic\* NEAR/3 shock\*)

#10 (bacterem\* or bacteraem\* or pyrexia or septicaem\* or septicem\*)

#11 SIRS or (Inflammatory next Response next Syndrome\*)

#12 bacteria\* NEAR infect\* NEAR (blood\* or serum or invas\* or severe or systemic)

#13 ((community next acquired) or severe) NEAR pneumonia

#14 (acute or adult) NEAR/2 (respiratory NEAR/2 distress)

#15 (acute or adult) NEAR/2 (lung NEAR/2 injury)

#16 ARDS

#17 #1 or #2 or #3 or #4 or #5 or #6 or #7 or #8 or #9 or #10 or #11 or #12 or #13 or #14 or #15 or #16

#18 MeSH descriptor: [Adrenal Cortex Hormones] explode all trees

#19 MeSH descriptor: [Hydrocortisone] explode all trees

#20 MeSH descriptor: [Cortisone] explode all trees

1  
2  
3 #21 MeSH descriptor: [Steroids] explode all trees  
4

5 #22 corticosteroid\* or steroid\* or cortison\* or hydrocortison\*  
6

7 #23 methylprednisolon\* or (methyl next prednisolon\*) or betamethason\* or dexamethason\*  
8 or glucocorticoid\* or fludrocortison\* or mineralocorticoid\*  
9

10  
11 #24 #18 or #19 or #20 or #21 or #22 or #23  
12

13 #25 #17 and #24  
14

15 #26 #25 in Trials  
16  
17

## 18 19 **2 Search strategy for MEDLINE (Ovid SP)** 20

21 1 exp Sepsis/  
22

23 2 exp Shock, Septic/  
24

25 3 Systemic Inflammatory Response Syndrome/  
26

27 4 exp Bacteremia/  
28

29 5 Bacterial Infections/bl, dt, co  
30

31 6 Pneumonia/co, dt  
32

33 7 Community-Acquired Infections/co, dt  
34

35 8 Respiratory Distress Syndrome, Adult/co, dt  
36

37 9 Acute Lung Injury/co, dt  
38

39 10 (sepsis or septic\*).mp.  
40

41 11 (bacter?em\* or septic?em\* or pyrexia).mp.  
42

43 12 (SIRS or Inflammatory Response Syndrome\*).mp.  
44

45 13 (bacteria\* adj6 infect\* adj6 (blood\* or serum or invas\* or severe or systemic)).mp.  
46

47 14 ((community-acquired or severe) adj3 pneumonia).mp.  
48

49 15 ((acute or adult) adj2 (respiratory adj2 distress)).mp.  
50

51 16 ARDS.mp.  
52

53 17 ((acute or adult) adj2 (lung adj2 injury)).mp.  
54  
55  
56  
57  
58  
59  
60



1  
2  
3 18 1 or 2 or 3 or 4 or 5 or 6 or 7 or 8 or 9 or 10 or 11 or 12 or 13 or 14 or 15 or 16 or 17  
4

5 19 exp Adrenal Cortex Hormones/  
6

7 20 exp Hydrocortisone/  
8

9 21 (corticosteroid\* or steroid\* or cortison\* or hydrocortison\*).mp.  
10

11 22 (methylprednisolon\* or betamethason\* or dexamethason\* or glucocorticoid\* or  
12 fludrocortison\* or mineralocorticoid\*).mp.  
13

14 23 19 or 20 or 21 or 22  
15

16 24 18 and 23  
17

18 25 ((randomized controlled trial or controlled clinical trial).pt. or randomi?ed.ab. or  
19 placebo.ab. or clinical trials as topic.sh. or randomly.ab. or trial.ti.) not (animals not (humans  
20 and animals)).sh.  
21

22 26 24 and 25  
23  
24  
25  
26  
27

### 28 **3 Search strategy for Embase (Ovid SP)**

29 1 exp sepsis/  
30

31 2 exp septic shock/  
32

33 3 pneumonia/co, dt [Complication, Drug Therapy]  
34

35 4 adult respiratory distress syndrome/co, dt [Complication, Drug Therapy]  
36

37 5 acute lung injury/co, dt [Complication, Drug Therapy]  
38

39 6 systemic inflammatory response syndrome/co, dt [Complication, Drug Therapy]  
40

41 7 community acquired infection/co, dt [Complication, Drug Therapy]  
42

43 8 (sepsis or (septic\* adj5 shock) or (bacter?em\* or pyrexia or septic?em\*) or (SIRS or  
44 Inflammatory Response Syndrome\*).mp.  
45

46 9 (bacteria\* adj2 infect\* adj2 (blood\* or serum or invas\* or severe or systemic)).mp.  
47

48 10 (((community-acquired or severe) adj2 pneumonia) or ((acute or adult) adj1 (respiratory  
49 adj1 distress)) or ((acute or adult) adj1 (lung adj1 injury)) or ARDS).mp.  
50

51 11 1 or 2 or 3 or 4 or 5 or 6 or 7 or 8 or 9 or 10  
52

53 12 steroid/  
54  
55  
56  
57  
58  
59  
60

1  
2  
3 13 corticosteroid/  
4

5 14 cortisone/  
6

7 15 hydrocortisone/  
8

9  
10 16 (corticosteroid\* or steroid\* or cortison\* or hydrocortison\* or (methylprednisolon\* or  
11 methyl prednisolon\* or betamethason\* or dexamethason\* or glucocorticoid\* or  
12 fludrocortison\* or mineralocorticoid\*)).mp.  
13

14  
15 17 12 or 13 or 14 or 15 or 16  
16

17 18 11 and 17  
18

19 19 ((placebo or randomized controlled trial).sh. or controlled study.ab. or random\*.ti,ab. or  
20 trial\*.ti,ab.) not (animal not human).sh.  
21

22  
23 20 18 and 19  
24

25  
26 **4 Search strategy for LILACS (via BIREME)**  
27

28 (sepsis OR septic\$ OR SEPSIS OR SEPTIC OR SIRS OR "septic shock" OR "SEPTIC  
29 SHOCK/" OR SEPTICEMIA OR PNEUMONIA OR bact\* OR "adult respiratory distress  
30 syndrome" OR "acute lung injury" OR "systemic inflammatory response syndrome" OR  
31 "bacterial infection" OR "community acquired infection" ) (corticosteroid\* OR steroid\* OR  
32 glucocorticoid\* OR CORTCOSTEROID\* OR GLUCOCORTICOID/ OR STEROID OR  
33 MINERALOCORTICOID OR cortison\* OR hydrocortison\* OR fludrocortison\* OR  
34 betamethason\* OR methylprednisolon\* OR prednison\* OR dexamethason\*)  
35  
36  
37  
38  
39  
40  
41  
42  
43  
44  
45  
46  
47  
48  
49  
50  
51  
52  
53  
54  
55  
56  
57  
58  
59  
60

**PRISMA-P (Preferred Reporting Items for Systematic review and Meta-Analysis Protocols) 2015 checklist: recommended items to address in a systematic review protocol\***

| Section and topic                 | Item No | Checklist item                                                                                                                                                                                                         | Reported on page |
|-----------------------------------|---------|------------------------------------------------------------------------------------------------------------------------------------------------------------------------------------------------------------------------|------------------|
| <b>ADMINISTRATIVE INFORMATION</b> |         |                                                                                                                                                                                                                        |                  |
| Title:                            |         |                                                                                                                                                                                                                        |                  |
| Identification                    | 1a      | Identify the report as a protocol of a systematic review                                                                                                                                                               | 1                |
| Update                            | 1b      | If the protocol is for an update of a previous systematic review, identify as such                                                                                                                                     |                  |
| Registration                      | 2       | If registered, provide the name of the registry (such as PROSPERO) and registration number                                                                                                                             | 1                |
| Authors:                          |         |                                                                                                                                                                                                                        |                  |
| Contact                           | 3a      | Provide name, institutional affiliation, e-mail address of all protocol authors; provide physical mailing address of corresponding author                                                                              | 1                |
| Contributions                     | 3b      | Describe contributions of protocol authors and identify the guarantor of the review                                                                                                                                    | 2                |
| Amendments                        | 4       | If the protocol represents an amendment of a previously completed or published protocol, identify as such and list changes; otherwise, state plan for documenting important protocol amendments                        | 3                |
| Support:                          |         |                                                                                                                                                                                                                        |                  |
| Sources                           | 5a      | Indicate sources of financial or other support for the review                                                                                                                                                          | 3                |
| Sponsor                           | 5b      | Provide name for the review funder and/or sponsor                                                                                                                                                                      | 3                |
| Role of sponsor or funder         | 5c      | Describe roles of funder(s), sponsor(s), and/or institution(s), if any, in developing the protocol                                                                                                                     | 3                |
| <b>INTRODUCTION</b>               |         |                                                                                                                                                                                                                        |                  |
| Rationale                         | 6       | Describe the rationale for the review in the context of what is already known                                                                                                                                          | 7                |
| Objectives                        | 7       | Provide an explicit statement of the question(s) the review will address with reference to participants, interventions, comparators, and outcomes (PICO)                                                               | 8                |
| <b>METHODS</b>                    |         |                                                                                                                                                                                                                        |                  |
| Eligibility criteria              | 8       | Specify the study characteristics (such as PICO, study design, setting, time frame) and report characteristics (such as years considered, language, publication status) to be used as criteria for eligibility for the | 9,10             |

| review                             |     |                                                                                                                                                                                                                                                  |                |
|------------------------------------|-----|--------------------------------------------------------------------------------------------------------------------------------------------------------------------------------------------------------------------------------------------------|----------------|
| Information sources                | 9   | Describe all intended information sources (such as electronic databases, contact with study authors, trial registers or other grey literature sources) with planned dates of coverage                                                            | 11             |
| Search strategy                    | 10  | Present draft of search strategy to be used for at least one electronic database, including planned limits, such that it could be repeated                                                                                                       | 11, appendix 2 |
| Study records:                     |     |                                                                                                                                                                                                                                                  |                |
| Data management                    | 11a | Describe the mechanism(s) that will be used to manage records and data throughout the review                                                                                                                                                     | 11,12          |
| Selection process                  | 11b | State the process that will be used for selecting studies (such as two independent reviewers) through each phase of the review (that is, screening, eligibility and inclusion in meta-analysis)                                                  | 11             |
| Data collection process            | 11c | Describe planned method of extracting data from reports (such as piloting forms, done independently, in duplicate), any processes for obtaining and confirming data from investigators                                                           | 12             |
| Data items                         | 12  | List and define all variables for which data will be sought (such as PICO items, funding sources), any pre-planned data assumptions and simplifications                                                                                          | 12,13          |
| Outcomes and prioritization        | 13  | List and define all outcomes for which data will be sought, including prioritization of main and additional outcomes, with rationale                                                                                                             | 13,14          |
| Risk of bias in individual studies | 14  | Describe anticipated methods for assessing risk of bias of individual studies, including whether this will be done at the outcome or study level, or both; state how this information will be used in data synthesis                             | 14             |
| Data synthesis                     | 15a | Describe criteria under which study data will be quantitatively synthesised                                                                                                                                                                      | 14             |
|                                    | 15b | If data are appropriate for quantitative synthesis, describe planned summary measures, methods of handling data and methods of combining data from studies, including any planned exploration of consistency (such as $I^2$ , Kendall's $\tau$ ) | 14,15          |
|                                    | 15c | Describe any proposed additional analyses (such as sensitivity or subgroup analyses, meta-regression)                                                                                                                                            | 15,16          |
|                                    | 15d | If quantitative synthesis is not appropriate, describe the type of summary planned                                                                                                                                                               |                |
| Meta-bias(es)                      | 16  | Specify any planned assessment of meta-bias(es) (such as publication bias across studies, selective reporting within studies)                                                                                                                    | 17             |

1  
2  
3  
4  
5  
6  
7  
8  
9  
10  
11  
12  
13  
14  
15  
16  
17  
18  
19  
20  
21  
22  
23  
24  
25  
26  
27  
28  
29  
30  
31  
32  
33  
34  
35  
36  
37  
38  
39  
40  
41  
42  
43  
44  
45  
46  
47  
48  
49  
50  
51  
52  
53  
54  
55  
56  
57  
58  
59  
60

---

|                                         |    |                                                                                       |    |
|-----------------------------------------|----|---------------------------------------------------------------------------------------|----|
| Confidence<br>in cumulative<br>evidence | 17 | Describe how the strength of the body of<br>evidence will be assessed (such as GRADE) | 17 |
|-----------------------------------------|----|---------------------------------------------------------------------------------------|----|

---

For peer review only

# BMJ Open

## The effects of low dose hydrocortisone and hydrocortisone plus fludrocortisone in adults with septic shock: a protocol for a systematic review and meta-analysis of individual participant data

|                                 |                                                                                                                                                                                                                                                                                                                                                                                                                                                                                                                                                                                                                                                                                                                                                                                                                                                                 |
|---------------------------------|-----------------------------------------------------------------------------------------------------------------------------------------------------------------------------------------------------------------------------------------------------------------------------------------------------------------------------------------------------------------------------------------------------------------------------------------------------------------------------------------------------------------------------------------------------------------------------------------------------------------------------------------------------------------------------------------------------------------------------------------------------------------------------------------------------------------------------------------------------------------|
| Journal:                        | <i>BMJ Open</i>                                                                                                                                                                                                                                                                                                                                                                                                                                                                                                                                                                                                                                                                                                                                                                                                                                                 |
| Manuscript ID                   | bmjopen-2020-040931.R2                                                                                                                                                                                                                                                                                                                                                                                                                                                                                                                                                                                                                                                                                                                                                                                                                                          |
| Article Type:                   | Protocol                                                                                                                                                                                                                                                                                                                                                                                                                                                                                                                                                                                                                                                                                                                                                                                                                                                        |
| Date Submitted by the Author:   | 31-Oct-2020                                                                                                                                                                                                                                                                                                                                                                                                                                                                                                                                                                                                                                                                                                                                                                                                                                                     |
| Complete List of Authors:       | annane, djillali; Versailles Saint-Quentin-en-Yvelines University, School of medicine; Universite Paris-Saclay<br>PIRRACCHIO, Romain; Zuckerberg San Francisco General Hospital and Trauma Center<br>Billot, Laurent; The George Institute for Global Health, Statistics Division<br>Waschka, Andre; University of California Berkeley<br>Chevret, Sylvie; University of Paris<br>Cohen, Jeremy; University of Queensland,<br>Finfer, Simon; The George Institute for Global Health<br>Gordon, Anthony; Imperial College London, 1. Section of Anaesthetics, Pain Medicine and Intensive Care<br>Hammond, Naomi ; George Institute for Global Health,<br>Myburgh, John; University of New South Wales, St George Clinical School<br>Venkatesh, Balasubramanian; Royal Brisbane and Women's Hospital<br>Delaney, Anthony; The George Institute for Global Health |
| <b>Primary Subject Heading</b>: | Intensive care                                                                                                                                                                                                                                                                                                                                                                                                                                                                                                                                                                                                                                                                                                                                                                                                                                                  |
| Secondary Subject Heading:      | Emergency medicine, Infectious diseases, Pharmacology and therapeutics                                                                                                                                                                                                                                                                                                                                                                                                                                                                                                                                                                                                                                                                                                                                                                                          |
| Keywords:                       | Adult intensive & critical care < INTENSIVE & CRITICAL CARE, Clinical trials < THERAPEUTICS, CLINICAL PHARMACOLOGY                                                                                                                                                                                                                                                                                                                                                                                                                                                                                                                                                                                                                                                                                                                                              |
|                                 |                                                                                                                                                                                                                                                                                                                                                                                                                                                                                                                                                                                                                                                                                                                                                                                                                                                                 |

SCHOLARONE™  
Manuscripts



I, the Submitting Author has the right to grant and does grant on behalf of all authors of the Work (as defined in the below author licence), an exclusive licence and/or a non-exclusive licence for contributions from authors who are: i) UK Crown employees; ii) where BMJ has agreed a CC-BY licence shall apply, and/or iii) in accordance with the terms applicable for US Federal Government officers or employees acting as part of their official duties; on a worldwide, perpetual, irrevocable, royalty-free basis to BMJ Publishing Group Ltd ("BMJ") its licensees and where the relevant Journal is co-owned by BMJ to the co-owners of the Journal, to publish the Work in this journal and any other BMJ products and to exploit all rights, as set out in our [licence](#).

The Submitting Author accepts and understands that any supply made under these terms is made by BMJ to the Submitting Author unless you are acting as an employee on behalf of your employer or a postgraduate student of an affiliated institution which is paying any applicable article publishing charge ("APC") for Open Access articles. Where the Submitting Author wishes to make the Work available on an Open Access basis (and intends to pay the relevant APC), the terms of reuse of such Open Access shall be governed by a Creative Commons licence – details of these licences and which [Creative Commons](#) licence will apply to this Work are set out in our licence referred to above.

Other than as permitted in any relevant BMJ Author's Self Archiving Policies, I confirm this Work has not been accepted for publication elsewhere, is not being considered for publication elsewhere and does not duplicate material already published. I confirm all authors consent to publication of this Work and authorise the granting of this licence.

1  
2  
3 **The effects of low dose hydrocortisone and hydrocortisone plus**  
4  
5  
6 **fludrocortisone in adults with septic shock: a protocol for a systematic**  
7  
8 **review and meta-analysis of individual participant data**  
9  
10  
11  
12  
13  
14

15 **Registration:**

16  
17  
18 Prospero registration number CRD42017062198  
19  
20  
21  
22

23 **Authors:**

24  
25  
26  
27 Djillali Annane,<sup>1</sup> Romain Pirracchio,<sup>2</sup> Laurent Billot,<sup>3</sup> Andre Waschka,<sup>4</sup> Sylvie Chevret,<sup>5</sup> Jeremy Cohen,<sup>3,6</sup> Simon  
28 Finfer,<sup>3,7,8</sup> Anthony Gordon,<sup>9</sup> Naomi Hammond,<sup>3,7</sup> John Myburgh,<sup>3,10</sup> Balasubramanian Venkatesh,<sup>3,11</sup>  
29 Anthony Delaney<sup>3,7</sup> for the **Utility of Steroids in Septic Shock individual Patient Data Meta-Analysis (ULYSSES**  
30 **IPDMA) Collaborators**  
31  
32  
33  
34  
35  
36

37 **Affiliations:**

- 38  
39 1. Department of Critical Care; Raymond Poincaré Hospital (AP-HP)  
40 Laboratory Infection & Inflammation, U1173, Faculty of Health Science Simone Veil, University of  
41 Versailles SQY- University Paris Saclay – INSERM- FHU SEPSIS; RHU RECORDS, France  
42  
43 2. Department of Anesthesia and Perioperative Medicine; Zuckerberg San Francisco General Hospital and  
44 Trauma Center; University of California San Francisco, USA  
45  
46 3. Division of Critical Care, The George Institute for Global Health, University of New South Wales,  
47 Newtown, Sydney, NSW, Australia,  
48  
49 4. **Department of Statistics, UC Berkeley, USA**  
50  
51 5. Department of Bioinformatics and Statistics, hôpital Saint Louis (AP-HP), University of Paris, Paris, France  
52  
53 6. Royal Brisbane and Women' Hospital, Brisbane, Queensland, Australia  
54  
55  
56  
57  
58  
59  
60



- 1
- 2
- 3 7. Malcolm Fisher Department of Intensive Care Medicine, Royal North Shore Hospital, St. Leonards, NSW,
- 4 Australia
- 5
- 6
- 7 8. School of Public Health, Imperial College London, London UK
- 8
- 9 9. Division of Anaesthetics, Pain Medicine and Intensive Care, Imperial College London, London UK
- 10
- 11 10. University of New South Wales, St. George Clinical School, Sydney, NSW, Australia
- 12
- 13 11. The Princess Alexandra Hospital, Brisbane, Queensland, Australia
- 14
- 15
- 16
- 17
- 18
- 19

## 20 **Correspondence :**

21 Djillali Annane

22

23 104 Boulevard Raymond Poincaré

24

25 92380 Garches

26

27 France

28

29 E-mail: [djillali.annane@aphp.fr](mailto:djillali.annane@aphp.fr)

30

31

32

33

34

35

36

37

38

39

40

41 **Word count:** 3994

## 42 **Author contributions:**

43

44

45

46

47 DA is the guarantor of the study. DA and RP were responsible for the conception of the study. DA and AD made

48 substantial contributions to the conception and design of the study, drafting of the study protocol, substantial

49 contributions to the analysis plan, revising the work critically for important intellectual content and providing

50 approval for the final version to be published. LB and RP made substantial contributions to the trial design and

51 analytical plan, revising the work critically for important intellectual content and provided approval for the final

52 version to be published. SC, AW, JC, SF, AG, NH, JM and BV made substantial contributions to the drafting of

53

54

55

56

57

58

59

60

1  
2  
3 the study protocol, revised the work critically for important intellectual content and provided approval for the  
4  
5 final version to be published.  
6  
7  
8  
9

### 10 **Ammendments:**

11  
12  
13 Version 1.0 dated 8 April, 2020  
14  
15  
16  
17

### 18 **Funding:**

19  
20  
21  
22 This research is part of FHU SEPSIS and RHU RECORDS, which are funded by the French government through  
23  
24 the Programme d'Investissements d'Avenir, project number ANR-18-RHUS60004. This research received no  
25  
26 specific grant from any agency in the commercial or not-for-profit sectors. The trial is funded by in-kind support  
27  
28 from University of Versailles SQY- University Paris Saclay, the Imperial NIHR Biomedical Research Centre and  
29  
30 the Division of Critical Care, The George Institute for Global Health. Funding sources will have no influence on  
31  
32 data handling or analyses or writing of the manuscript but will be acknowledged in the principal manuscript.  
33  
34  
35  
36  
37  
38  
39  
40  
41  
42  
43  
44  
45  
46  
47  
48  
49  
50  
51  
52  
53  
54  
55  
56  
57  
58  
59  
60

## Abstract

### Introduction

The benefits and risks of low dose hydrocortisone in patients with septic shock have been investigated in numerous randomized controlled trials and trial-level meta-analyses. Yet, the routine use of this treatment remains controversial. To overcome the limitations of previous meta-analyses inherent to the use of aggregate data, we will perform an individual patient data meta-analysis (IPDMA) on the effect of hydrocortisone with or without fludrocortisone compared to placebo or usual care on 90-day mortality and other outcomes in patients with septic shock.

### Methods and analysis

To assess the benefits and risks of hydrocortisone, with or without fludrocortisone for adults with septic shock, we will search major electronic databases from inception to September 2020 (Cochrane Central Register of Controlled Trials-CENTRAL, MEDLINE, EMBASE and Latin American Caribbean Health Sciences Literature-LILACS), complimented by a search for unpublished trials. The primary analysis will compare hydrocortisone with or without fludrocortisone to placebo or no treatment in adult patients with septic shock. Secondary analyses will compare hydrocortisone to placebo (or usual care), hydrocortisone plus fludrocortisone to placebo (or usual care), and hydrocortisone versus hydrocortisone plus fludrocortisone. The primary outcome will be all cause mortality at 90-day. We will conduct both one-stage IPDMA using mixed-effect models and machine learning with targeted maximum likelihood analyses. We will assess the risk of bias related to unshared data and related to the quality of individual trial.

### Ethics and dissemination

This individual patient data meta-analysis will use existing data from completed randomized clinical trials and will comply with the ethical and regulatory requirements regarding data sharing for each of the component trials. The findings of this study will be submitted for publication in a peer-review journal with straightforward policy for open access.

1  
2  
3 The protocol for this systematic review has been registered on PROSPERO on April 6<sup>th</sup> 2017, Prospero  
4  
5 registration number CRD42017062198  
6  
7  
8  
9  
10  
11

12 **Key words:**  
13

14  
15  
16 adults – septic shock – corticosteroids - machine learning – individual patient data meta-analysis  
17  
18  
19  
20  
21  
22  
23  
24  
25  
26  
27  
28  
29  
30  
31  
32  
33  
34  
35  
36  
37  
38  
39  
40  
41  
42  
43  
44  
45  
46  
47  
48  
49  
50  
51  
52  
53  
54  
55  
56  
57  
58  
59  
60

For peer review only

## Article Summary

### Strengths and limitations of this study

- This will be to the best of our knowledge the first individual-patient data meta-analysis on the use of hydrocortisone with or without fludrocortisone for septic shock.
- The use of individual patient data will allow estimation of subgroup effects based on patient level covariates.
- The analysis will provide the best assessment with currently available data on whether hydrocortisone with or without fludrocortisone confers benefits to patients with septic shock and to assess whether there is an optimal regimen for administration.
- The main limitations are regulatory barriers in accessing individual data from original trials, and technical barriers to combining individual patient data from the component trials.

## Introduction

### Rationale

Septic shock is a global health priority.<sup>1</sup> In 2017, there were about 49 million incident cases of sepsis worldwide and 11 million sepsis-related deaths, representing roughly one out of five of all global deaths.<sup>2</sup> There is a need for improved treatments for this unacceptably high mortality rate. The Surviving Sepsis Campaign<sup>3</sup> recommend that, in the first hour of sepsis recognition, physicians obtain blood cultures, administer broad-spectrum antibiotics, start appropriate fluid resuscitation, and begin vasopressors whenever needed. Beyond these core measures, there has been little change in the management of sepsis.

What has changed in recent years, has been the understanding that dysregulation of the host response to infection is key to understanding the pathophysiology of septic shock.<sup>4</sup> This dysregulated host response may be a therapeutic target to improve mortality in patients with septic shock. As early as the 1950s, physicians have used corticosteroids with clinical success in patients with severe infection not responding to antibiotic treatment.<sup>5</sup> Seventy years later, their use in the management of sepsis remains controversial. The fourth revision of the Surviving Sepsis Campaign guidelines suggested against the use of hydrocortisone except in patients poorly responsive to fluids and vasopressors.<sup>3</sup> Since this revision of the guidelines, two major trials have substantially contributed to the understanding of the benefits and risks of corticosteroids for adults with septic shock.<sup>6,7</sup> Both trials used a daily intravenous dose of 200 mg hydrocortisone for seven days without taper-off. The main differences in the trials' design included continuous infusion of hydrocortisone<sup>7</sup> versus intravenous bolus every 6 hours,<sup>6</sup> hydrocortisone alone<sup>7</sup> versus with fludrocortisone,<sup>6</sup> unspecified vasopressor-dependency<sup>7</sup> versus requirement for a minimal dose of  $\geq 0.25 \mu\text{g}/\text{kg}/\text{min}$  or  $\geq 1\text{mg}/\text{h}$  norepinephrine/epinephrine,<sup>6</sup> and unspecified ventilator-dependency<sup>7</sup> versus need for mechanical ventilation.<sup>6</sup> These trials found similar benefits in terms of resolution of shock and organs dysfunction, of accelerating weaning off mechanical ventilation and reducing length of stay in the intensive care unit. They also found no evidence for serious adverse complications with corticosteroids. A mortality benefit with corticosteroids was only reported in APROCCHSS trial<sup>7</sup> but not in ADRENAL.<sup>6</sup>

1  
2  
3 Since 2018, eight trial-level meta-analyses have addressed the effects of corticosteroids in sepsis.<sup>8-15</sup> They have  
4 different designs including differences in trials eligibility criteria, search strategies and in statistical models. The  
5 number of included trials ranged from 14 to 61 and the number of participants ranged from 6,935 to 12,192.  
6  
7 The relative risk (RR) of death in the short-term varied from 0.90 to 0.98, and the upper limit of the 95%  
8 confidence interval varied from 0.98 to 1.08. The magnitude and direction of the pooled RR of dying in the  
9 short-term were consistent across these meta-analyses in favoring corticosteroids but differed mainly by the  
10 presence of some imprecision in the point estimate. More recent meta-analyses found substantial  
11 heterogeneity in the results possibly explained by differences in type of participants (e.g. all ages versus adults  
12 only, all sepsis severity versus only septic shock or community-acquired pneumonia or sepsis and ARDS, and in  
13 treatments administration (hydrocortisone versus synthetic glucocorticoids, low versus high dose, short versus  
14 long course). Intravenous administration of hydrocortisone may be the most frequent prescribed regimen and  
15 people may use this drug in sepsis with or without shock.<sup>16</sup> A noteworthy limitation of these meta-analyses is  
16 the use of aggregate data, limiting the opportunity to harmonize outcome definitions across trials, adjust the  
17 estimated treatment effect on potential confounders and investigate different subgroups.  
18  
19  
20  
21  
22  
23  
24  
25  
26  
27  
28  
29  
30  
31  
32

33 To address this significant drawback of earlier meta-analyses, we will perform a systematic review and  
34 individual patient data meta-analysis (IPDMA) from trials to assess the effect of intravenous hydrocortisone  
35 with or without fludrocortisone, compared to placebo or usual care on 90-day mortality and other outcomes in  
36 patients with septic shock.  
37  
38  
39  
40  
41  
42  
43  
44  
45  
46  
47  
48  
49

## 50 Objectives

51 The primary objective of this IPDMA is to assess the effect on 90-day mortality of intravenous hydrocortisone  
52 therapy, with or without fludrocortisone, compared to placebo or usual care, in adults with septic shock.  
53

54 Other objectives of this IPDMA include:

- 55 • To compare the effect on 90-day mortality of intravenous hydrocortisone therapy with or without  
56 fludrocortisone, for differing modes of hydrocortisone therapy;
  - 57 ○ Bolus compared to continuous infusion
  - 58
  - 59
  - 60

- Tapered dosing compared to abrupt discontinuation
- Duration of treatment at full dose : fixed duration versus based on vasopressor-dependency
- To compare the effects of intravenous hydrocortisone therapy with or without fludrocortisone in adults with septic shock on secondary outcomes including 28-day and 180-day mortality, requirement for, and duration of organ support, resources utilization as measured by ICU and hospital length of stay, and serious adverse events.
- To compare the effect on 90-day mortality of intravenous hydrocortisone therapy with or without fludrocortisone in adults with septic shock in clinically important subgroups defined by;
  - age
  - sex
  - vasopressor-dependency
  - vasopressin administration
  - predicted mortality
  - SOFA score
  - arterial lactate concentrations and
  - etomidate exposure

## Methods and analysis

This protocol follows the recommendations from the EQUATOR network statement on Preferred Reporting Items for Systematic Reviews and Meta-Analyses Protocols (PRISMA-P)<sup>17</sup> and will allow the report of the completed study to comply with reporting items recommended in the PRISMA of Individual Participant Data (PRISMA IPD).<sup>18</sup>

## Eligibility Criteria

### Types of studies



1  
2  
3 We will consider only randomized trials. We will exclude quasi-randomized trials, trials with a crossover design  
4  
5 or those for which the unit of randomization is not the patient. We will only include trials, which received an  
6  
7 appropriate approval from a research ethics committee and where there was an appropriate method of  
8  
9 obtaining consent.  
10

### 11 12 **Types of participants**

13  
14  
15 We will consider trials that have included adults with sepsis or septic shock as defined in original studies. Trials  
16  
17 of mixed population will be eligible whenever separate information will be available for the subset of patients  
18  
19 with septic shock as defined in original studies. We will exclude trials in children or those performed in patients  
20  
21 without sepsis.  
22  
23

### 24 25 **Types of interventions and controls**

26  
27  
28 We will consider trials in which the experimental intervention was intravenous hydrocortisone at a maximal  
29  
30 daily dose of 400mg for at least 72 hours at full dose, whether given as intermittent bolus or as a continuous  
31  
32 infusion, and whether tapered off or not. We will also consider trials that have investigated the combination of  
33  
34 intravenous hydrocortisone and oral (or enteral) fludrocortisone. We will consider trials in which the  
35  
36 comparator was a placebo, no treatment, or hydrocortisone alone when the experimental intervention was the  
37  
38 combination of hydrocortisone to fludrocortisone. We will also consider trials that compared two doses of  
39  
40 hydrocortisone or bolus versus continuous administration.  
41

42 We will exclude trials that have investigated

- 43  
44 1) corticosteroids other than hydrocortisone or fludrocortisone,
- 45  
46 2) dosage of hydrocortisone higher than 400mg per day,
- 47  
48 3) duration of hydrocortisone of less than 72 hours at full dose,
- 49  
50 4) oral route of hydrocortisone.  
51

52 We will also exclude trials for when we are unable to contact the primary author and/or sponsor or they refuse  
53  
54 to share data. Nevertheless, in case of non-response or refusal, we will use published aggregated data and  
55  
56 combine them to the IPDMA results in a sensitivity analysis, as described in the statistical plan.  
57  
58  
59  
60

## Types of outcome measures

We will only consider trials for inclusion in this review that have information on crude mortality rates at any time point post randomisation.

## Information sources

We will attempt to identify all relevant studies regardless of language or publication status (published, unpublished, in press, in progress). We will use the strategy of the recently completed Cochrane systematic review on the use of corticosteroids in sepsis.<sup>9</sup>

We will search the Cochrane Central Register of Controlled Trials (CENTRAL; 2020 Issue 9) using the search terms 'sepsis', 'septic shock', 'steroids' and 'corticosteroids'. We will also search (up to September 2020) MEDLINE, EMBASE and Latin American Caribbean Health Sciences Literature (LILACS) using the topic search terms in combination with the search strategy for identifying trials developed by The Cochrane Collaboration (Appendix 1).<sup>19</sup>

We will check the reference lists of all trials identified by these methods, and we will contact study authors to request individual published or unpublished data. We also will search the proceedings of annual meetings of major critical care medicine symposia, that is, Society of Critical Care Medicine (1998 to 2020), American Thoracic Society (1998 to 2020), International Symposium on Intensive Care and Emergency Medicine (1998 to 2020), American College of Chest Physicians and European Society of Intensive Care Medicine (1998 to 2020).

## Search strategy

The full search strategy is available in Appendix 1

## Study records

## Selection processes and data management

1  
2  
3 We will perform all screening in duplicate with disagreements resolved by consensus and third-party  
4 adjudication when consensus could not be reached. After implementation of the search strategy, reviewers will  
5 work in pairs to screen all potentially relevant citations and references. Screening will be performed in two  
6 stages, initially reviewing titles and abstracts, and then full text for possibly relevant manuscripts. We will  
7 capture reasons for exclusion.  
8  
9  
10  
11  
12

### 13 **Obtaining individual patient data**

14  
15  
16  
17  
18 One reviewer (DA) will contact the primary author and/or sponsor of all selected trials for potential agreement  
19 to share de-identified individual patient data from their trial for the purpose of this patient-level meta-analysis.  
20 They will define whether data will be freely available or only after application to and approval by a learned  
21 intermediary and whether we will require a data use agreement. In case of non-response or refusal, we will use  
22 published aggregated data and combine them to the IPDMA results in a sensitivity analysis. Data will be stored  
23 on a secure server hosted by University of Versailles SQY.  
24  
25  
26  
27  
28  
29  
30

### 31 **Data extraction and management**

32  
33  
34 Two reviewers (RP and DA) will independently check data supplied for included trials for missing data, internal  
35 data consistency, randomization integrity (balance of patient characteristics at randomisation, pattern of  
36 randomisation), follow-up and censoring pattern. We will check summary tables with the trial protocol and  
37 latest trial report or publication. We will solve any discrepancies or unusual patterns with the study  
38 investigator. We will return a final copy of the form from each trial to the appropriate trial investigator for  
39 verification.  
40  
41  
42  
43  
44  
45  
46  
47  
48  
49

### 50 **Data items**

51  
52  
53 Specifically, with regards to the population of patients for the primary analysis, these will be adult patients with  
54 septic shock. Adults will be those 18 years or older at time of randomization. Septic shock will be defined  
55 according to the definition used in each clinical trial. Each included patient will meet at least one of the  
56 following criteria  
57  
58  
59  
60

- 1
- 2
- 3 1. Systolic blood pressure <100 mmHg or mean arterial pressure <65 mm Hg after fluid resuscitation
- 4
- 5 2. Lactate > 2mmol/L
- 6
- 7 3. Requirement for vasopressors to maintain an adequate blood pressure.
- 8

9 The intervention of interest is hydrocortisone, administered intravenously at a dose of less than 400mg per  
10 day, either in divided bolus doses, or as a continuous infusion. We will record the dose, the mode of  
11 administration, the duration of administration, and the mode of cessation, either tapered, or abruptly ceased.

12 We will record whether fludrocortisone was administered, the dose and duration of administration. The details  
13 of the comparison group, either placebo or standard care will be recorded.  
14

## 15 Outcomes and prioritization

16 The primary outcome measure for this meta-analysis will be 90-day all-cause mortality.

17 Secondary outcomes will include:

- 18 • All-cause mortality at ICU and hospital discharge, at 28 days and at 180 days,
- 19
- 20 • Time to resolution of organ failure (defined as a SOFA < 4), time to vasopressor withdrawal, and time  
21 to cessation of mechanical ventilation. We will also calculate organ-failure/vasopressor/mechanical  
22 ventilation free days (up to 28 day). Event free days will be calculated as the number of days alive  
23 from randomisation to day 28 and having a SOFA score<4, being off vasopressors, off mechanical  
24 ventilation. When death occurred before reaching a SOFA<4 or before being off vasopressor or  
25 mechanical ventilation, the number of event-free days will be zero. For these outcomes, we will  
26 consider only the first episode. Recovery from organ failure will be defined by a SOFA score<4 for at  
27 least 24 hours. Weaning from vasopressor will be defined by being off any dose of  
28 vasopressor/inotrope for at least 24 consecutive hours. Weaning from mechanical ventilation will be  
29 defined by being off any mode of respiratory support for at least 24 hours.
- 30
- 31 • Length of stay in the ICU and in the hospital,
- 32
- 33 • Superinfection, as defined by any new infection occurring >48 hours after randomization,
- 34
- 35 • Number of days with hyperglycaemia defined as, at least one episode of blood glucose levels  
36 >180mg/dl in the corresponding 24 hours,  
37  
38  
39  
40  
41  
42  
43  
44  
45  
46  
47  
48  
49  
50  
51  
52  
53  
54  
55  
56  
57  
58  
59  
60

- Number of days with hypernatremia, defined as at least one episode of serum sodium concentration >150mmol/L in the corresponding 24 hours,
- Bleeding complications: gastroduodenal defined as any episode of gastroduodenal bleeding reported by the investigators of original studies, regardless the need for transfusion or haemostatic intervention
- Critical illness associated muscle weakness at the longest follow-up as defined in individual trials

### **Risk of bias in individual studies**

Risk of bias will be assessed, independently and in duplicate, for each of the individual studies using a modified Cochrane risk of bias tool<sup>20</sup> that classifies risk of bias as “low”, “probably low”, “probably high”, or “high” for each of the following domains: sequence generation, allocation sequence concealment, blinding, selective outcome reporting and other bias. We will rate the overall risk of bias as the highest risk attributed to any criterion. Reviewers will not contribute to risk of bias assessment for trials in which they have participated.

### **Data synthesis**

Baseline patient characteristics will be presented by study and treatment group. For continuous variables, mean and standard deviation (SD) or median and interquartile range (IQR) will be reported, as appropriate. For categorical variables, the number of observations in each category and corresponding proportions will be reported. Patient characteristics across groups will be contrasted using nonparametric Kruskal-Wallis tests for continuous variables and chi-square or Fisher exact tests for categorical variables. Since earlier and later deaths may stem from qualitatively different processes, to provide a more comprehensive depiction of mortality, length of stay in the ICU or in the hospital will be reported in the overall population as well as in the subpopulation of survivors at day 90. All tests will be two-sided and conducted at significance level 0.05. No formal adjustment for multiple testing will be undertaken. Given the number of secondary outcomes and subgroup analyses to be performed, interpretation of p-values, beyond the primary outcome, will be undertaken very cautiously.

## Data analysis

We will consider as the primary analysis, the comparison between hydrocortisone (with or without fludrocortisone) and placebo (or no treatment) on 90-day mortality for patients with septic shock, Pre-specified secondary analyses will include all possible pairwise comparisons, namely, hydrocortisone versus placebo, hydrocortisone plus fludrocortisone versus placebo, hydrocortisone plus fludrocortisone versus hydrocortisone.

In order to increase the robustness of the results, we will perform two different statistical approaches, i.e. a one stage conventional meta-analysis and machine-learning targeted maximum likelihood analysis.

As suggested by different studies comparing one-stage to two-stage approaches<sup>21 22</sup> the conventional will be performed using a one-stage meta-analysis. In one-stage meta-analysis, all data from all studies are aggregated and the primary outcome is analyzed simultaneously by adopting a single statistical model that accounts for potential heterogeneity across studies.<sup>23</sup> Analyses will rely on generalized linear mixed effect models (GLMM) where both the intercept and the treatment effect will be treated as random variables with the study as the subject (i.e. a random study intercept and a random study-by-treatment interaction). For the primary outcome and for binary secondary outcomes, we will use a GLMM with a logit link function.

Continuous secondary outcomes will be analysed using a GLMM with an identity link function. Our estimates of the average treatment effect will be adjusted for study (random effect), age, predicted mortality from SAPS2 or APACHE 2, SOFA, admission type (medical, elective surgery or emergent surgery), infection site infection type (hospital versus community acquired infection) and type of pathogen, baseline and increment in cortisol levels post corticotrophin, lactate levels, and need for mechanical ventilation (fixed effects). A study-by-treatment interaction term will be also be included in the model. For withdrawal of vasopressor therapy, withdrawal of mechanical ventilation, and recovery from organ failure (defined by a SOFA score <4 for at least 24 hours, we will use only cases with complete data for SOFA score), cumulative event incidences will be estimated using a nonparametric estimator and will be compared using Gray's test, with death treated as a competing risk<sup>24</sup> and study used as random effect.<sup>25</sup> We will not adjust for multiple testing and consider findings from analyses other than the primary analysis of the primary outcome, as of exploratory nature.<sup>26-28</sup>

We will also estimate the average treatment effect via a more flexible estimator, namely the targeted maximum likelihood estimator (TMLE).<sup>29</sup> In this analysis, different portions of the likelihood will be modelled

1  
2  
3 using Super Learner and combined to produce a plug-in estimator of the average treatment effect that is  
4 consistent, double robust and asymptotically linear. We will use a Super Learner with a large library including  
5 logistic regression models, stepwise regression models based on the Akaike information criterion, mixed  
6 logistic models with random effect to account for study-level and patient-level heterogeneity, multivariate  
7 adaptive regression splines, random forests, Bayesian generalized linear models, elastic net regularized  
8 generalized linear models, and gradient boosting, to estimate flexibly the relationship between mean outcome  
9 and covariates. For the pairwise comparisons between combinations of hydrocortisone, fludrocortisone and  
10 placebo, we will use network meta-analysis techniques<sup>30</sup> to assess the robustness of the results.  
11  
12 For binary outcomes, we will describe the average treatment effect using risk ratio (RR) or odds ratio (OR)  
13 estimate along with corresponding 95% CI and p-value. For continuous outcomes, we will describe the average  
14 treatment effect using mean difference (MD) estimate along with a corresponding 95% CI and p-value. We will  
15 test for qualitative interaction between treatment effect and subgroup of interest using the Gail and Simon  
16 interaction test.<sup>31</sup>  
17  
18  
19  
20  
21  
22  
23  
24  
25  
26  
27  
28  
29  
30  
31  
32

### 33 **Subgroup analysis**

34  
35  
36 We will perform, if data permit, the following subgroup analyses:

- 37  
38 • We will examine treatment effect in the subgroup of patients meeting sepsis or septic shock criteria  
39 according to Sepsis 3 definition<sup>4</sup>;
- 40  
41 • We will also examine any variation in response to treatment according to baseline prognosis factors  
42 including  
43
  - 44 ○ age (by quartiles),
  - 45 ○ sex,
  - 46 ○ vasopressor-dependency (yes versus no, and by quartiles of baseline dose),
  - 47 ○ vasopressin administration (yes or no),
  - 48 ○ predicted mortality from SAPSII or APACHEII (by quartiles),
  - 49 ○ SOFA score and each of its component (by quartiles),
  - 50 ○ arterial lactate levels (by quartiles) and
  - 51
  - 52
  - 53
  - 54
  - 55
  - 56
  - 57
  - 58
  - 59
  - 60

- etomidate-free versus etomidate-exposed patients
- appropriate antibiotic treatment
- We will examine any variation in treatment response according to patient's adrenal status, i.e. responders to standard corticotrophin test (those whom stimulated cortisol levels increased by >9µg/dL from baseline value) versus non-responders to corticotrophin test,
- We will examine any variation in treatment response according to pre-existing conditions other than sepsis that are likely to be associated with altered hypothalamic-pituitary adrenal axis, the renin-angiotensin-aldosterone axis, or both We will examine any variation in treatment response according to timing of hydrocortisone initiation, i.e. within 24hours versus >24 hours of meeting trial's criteria of shock, and
- we will examine any variation in response to treatment according to infection characteristics, i.e.
  - community versus hospital acquired,
  - medical vs. surgical, lung versus other sources of infection, and
  - gram negative versus gram positive versus polymicrobial.

### Methods to assess bias

We will assess for the potential for publication bias or small study bias by inspection of funnel plots and the use of Egger's test. The potential bias introduced by the studies that could not be included in the analyses will be evaluated<sup>32</sup> by performing a two-stage meta-analysis aggregating the results obtained on shared data and treatment effect estimates published for unshared data, if data permit. Specifically, the available IPD will first be reduced to aggregated data using the modelling methods described above. Then, these aggregated data will be pooled with published aggregated data into a weighted average.<sup>33 34</sup> Heterogeneity will be assessed by using an estimate of Tau<sup>2</sup> generated from the one stage and two-stage models.

### Confidence in cumulative evidence



1  
2  
3 We will present a summary of results and recommendations in accordance with the GRADE approach to assess  
4  
5 the overall quality of the evidence.<sup>35 36</sup>  
6  
7

#### 8 **Patient and Public involvement:**

9

10  
11 This protocol is under review by sepsis survivors and stakeholders from the Australian Sepsis Network.<sup>37</sup>  
12  
13

### 14 **Ethics and Dissemination**

15  
16

#### 17 **Ethics**

18  
19  
20

21  
22 This planned IPDMA will use existing data from completed randomized controlled trials, reporting explicitly  
23  
24 ethical approval of the original protocol and the process for obtaining patients consent.  
25  
26  
27

#### 28 **Publications Plan:**

29  
30

31  
32 We will report the findings according to the PRISMA-IPD statement.<sup>18</sup> We will share the findings from this  
33  
34 IPDMA with primary authors and sponsors of included trials prior to submitting the results of this primary  
35  
36 analysis for publication.  
37  
38  
39  
40  
41  
42

- 43 **1.** The study protocol including the statistical analysis plan will be published prior to publishing the  
44 results of the primary analysis  
45
- 46 **2.** Upon completion of the primary analysis, the main manuscript will be submitted to one of the major  
47 clinical journals regardless of the results.  
48
- 49 **3.** Sub-studies, as approved by the Executive Committee, can be published after the publication of the  
50 primary analysis. The Executive Committee will grant authorship depending on personal input but shall  
51 include appropriate acknowledgment of the included trials, site Investigators and the Clinical Trials  
52 Groups where appropriate.  
53  
54  
55  
56  
57  
58  
59  
60

### Authorship Guidance:

In keeping with the ICMJE guidance (<http://www.icmje.org/recommendations/browse/roles-and-responsibilities/defining-the-role-of-authors-and-contributors.html>), authors shall meet the following 4 criteria: Substantial contributions to the conception or design of the work; or the acquisition, analysis, or interpretation of data for the work; AND

- Drafting the work or revising it critically for important intellectual content; AND
- Final approval of the version to be published; AND
- Agreement to be accountable for all aspects of the work in ensuring that questions related to the accuracy or integrity of any part of the work are appropriately investigated and resolved

### Authorships specifics:

For the principal publication the study will be conducted in the name of the **Utility of Steroids in Septic Shock (ULYSSES) IPDMA** investigators and acknowledge the included studies, and where appropriate, the Clinical Trials Groups. Where individuals' name is required for publication (e.g.: publication mast) the listing of authors will be as follows: Prof Romain Pirracchio will be the first author, Prof Djillali Annane will be the second (listed as co-first) and corresponding author, followed by members of the writing committee, with Associate Professor Delaney as the senior author. The writing committee shall comprise the included trials' chief investigators and members of the executive committee who have contributed substantially to one or more of: trial design or management, or data analysis and meet the ICMJE criteria for authorship.<sup>38</sup>

### Discussion

This IPDMA will provide the highest level of evidence about the benefit and risk of hydrocortisone therapy for adults with septic shock.<sup>39 40</sup> This collaborative group includes most of the principal investigators of trials on hydrocortisone for sepsis/septic shock, reducing the risk of sharing refusal. In contrast to trial-level meta-analyses, this IPDMA will permit clarifying the role of fludrocortisone and identifying the optimal modalities for corticosteroids administration in septic shock. In addition, it will help identifying subgroups of patients more likely to benefit from corticosteroids and those at high risk of harm. Finally, we will use the one-stage analysis and a machine learning with targeted maximum likelihood analysis (TMLE).<sup>29</sup> TMLE may reduce bias and

1  
2  
3 increase efficiency and power when applied to treatment effect estimation in trials.<sup>41</sup> TMLE requires to model  
4 separately different parts of the likelihood. A wide variety of flexible regression algorithms including mixed-  
5 effect models may help mitigating the risk of model misspecification associated with standard regression  
6 approaches. The Super Learner (SL) <sup>42</sup> is an ensemble machine-learning algorithm that automatically constructs  
7 an optimal weighted combination estimator based on a collection of supplied candidate estimators. The SL  
8 yields an estimator that is mathematically guaranteed to perform essentially as well as or better than the best  
9 candidate among the ones it is built upon – this is significant since in practice which of the candidate estimators  
10 behaves best in a given problem and dataset is not known to the analyst.<sup>42</sup> In the context of IPDMA, as  
11 compared to GLMM, this approach may avoid any strong assumption about the functional form of the  
12 relationship between outcome and explanatory variables. It may help leverage the advantages of all candidate  
13 learners such as GLMM. Finally, it may allow accounting for potential high-order interactions by including in the  
14 library highly flexible algorithms such as random forests. In this analysis, different portions of the likelihood will  
15 be modelled using SL and combined to produce a plug-in estimator of the average treatment effect that is  
16 consistent, double robust and asymptotically linear.  
17  
18  
19  
20  
21  
22  
23  
24  
25  
26  
27  
28  
29  
30  
31  
32

### 33 **Acknowledgment**

34 We would like to thank the primary authors and sponsors that have provided access to their trial's database.  
35  
36  
37  
38  
39

### 40 **Conflict of interest**

41 Djillali ANNANE: has received funding from French government to conduct trials that will be included in this  
42 systematic review (trials acronym: Ger-Inf-05; COIITSS, APROCCHS) – he received funding for FHU SEPSIS and  
43 RHU RECORDS research programs. The current IPDMA he was responsible for the Cochrane systematic review  
44 on corticosteroids for sepsis in children and adults, and this work will use part of data obtained in the Cochrane  
45 review.  
46  
47

48 Romain PIRRACCHIO : no conflict of interest  
49

50 Laurent BILLOT : no conflict of interest  
51

52 André WASCHKA : no conflict of interest  
53

54 Sylvie CHEVRET : no conflict of interest  
55

56 Jeremy COHEN: no conflict of interest  
57

58 Simon FINFER: no conflict of interest  
59  
60

1  
2  
3 Anthony C. GORDON: has received funding from an NIHR Research Professorship (RP-2015-06-18),  
4 consulting fees paid to his institution from GlaxoSmithKline and Bristol Myers Squibb, and personal  
5 consulting fees from Baxter Healthcare  
6

7  
8 Naomi HAMMOND: no conflict of interest  
9

10 John MYBURGH: no conflict of interest  
11

12 Balasubramanian VENKATESH: no conflict of interest  
13

14 Anthony DELANEY: no conflict of interest  
15  
16

### 17 **Data statements**

18  
19 Data may be accessed only by written request to the primary author of individual studies that will be included  
20  
21 in this individual patient data meta-analysis.  
22  
23  
24  
25  
26  
27  
28  
29  
30  
31  
32  
33  
34  
35  
36  
37  
38  
39  
40  
41  
42  
43  
44  
45  
46  
47  
48  
49  
50  
51  
52  
53  
54  
55  
56  
57  
58  
59  
60

## Reference

1. Reinhart K, Daniels R, Kissoon N, et al. Recognizing Sepsis as a Global Health Priority - A WHO Resolution. *The New England journal of medicine* 2017;377(5):414-17. doi: 10.1056/NEJMp1707170 [published Online First: 2017/06/29]
2. Rudd KE, Johnson SC, Agesa KM, et al. Global, regional, and national sepsis incidence and mortality, 1990-2017: analysis for the Global Burden of Disease Study. *Lancet* 2020;395(10219):200-11. doi: 10.1016/s0140-6736(19)32989-7 [published Online First: 2020/01/20]
3. Rhodes A, Evans LE, Alhazzani W, et al. Surviving Sepsis Campaign: International Guidelines for Management of Sepsis and Septic Shock: 2016. *Intensive care medicine* 2017;43(3):304-77. doi: 10.1007/s00134-017-4683-6 [published Online First: 2017/01/20]
4. Singer M, Deutschman CS, Seymour CW, et al. The Third International Consensus Definitions for Sepsis and Septic Shock (Sepsis-3). *Jama* 2016;315(8):801-10. doi: 10.1001/jama.2016.0287 [published Online First: 2016/02/24]
5. Kinsell LW, Boling L, Partridge JW, et al. Corticotropin (ACTH) and cortisone; newer concepts of their use in clinical practice. *Calif Med* 1953;78(6):487-90. [published Online First: 1953/06/01]
6. Annane D, Renault A, Brun-Buisson C, et al. Hydrocortisone plus Fludrocortisone for Adults with Septic Shock. *The New England journal of medicine* 2018;378(9):809-18. doi: 10.1056/NEJMoa1705716 [published Online First: 2018/03/01]
7. Venkatesh B, Finfer S, Cohen J, et al. Adjunctive Glucocorticoid Therapy in Patients with Septic Shock. *The New England journal of medicine* 2018;378(9):797-808. doi: 10.1056/NEJMoa1705835 [published Online First: 2018/01/20]
8. Allen JM, Feild C, Shoulders BR, et al. Recent Updates in the Pharmacological Management of Sepsis and Septic Shock: A Systematic Review Focused on Fluid Resuscitation, Vasopressors, and Corticosteroids. *Ann Pharmacother* 2019;53(4):385-95. doi: 10.1177/1060028018812940 [published Online First: 2018/11/09]

- 1  
2  
3 9. Annane D, Bellissant E, Bollaert PE, et al. Corticosteroids for treating sepsis in children and adults. *Cochrane*  
4 *Database Syst Rev* 2019;12:Cd002243. doi: 10.1002/14651858.CD002243.pub4 [published Online First:  
5 2019/12/07]  
6  
7  
8  
9  
10 10. Fang F, Zhang Y, Tang J, et al. Association of Corticosteroid Treatment With Outcomes in Adult Patients  
11 With Sepsis: A Systematic Review and Meta-analysis. *JAMA internal medicine* 2019;179(2):213-23. doi:  
12 10.1001/jamainternmed.2018.5849 [published Online First: 2018/12/24]  
13  
14  
15  
16 11. Lin LL, Gu HY, Luo J, et al. Impact and Beneficial Critical Points of Clinical Outcome in Corticosteroid  
17 Management of Adult Patients With Sepsis: Meta-Analysis and GRADE Assessment. *Front Pharmacol*  
18 2019;10:1101. doi: 10.3389/fphar.2019.01101 [published Online First: 2019/10/15]  
19  
20  
21  
22  
23 12. Ni YN, Liu YM, Wang YW, et al. Can corticosteroids reduce the mortality of patients with severe sepsis? A  
24 systematic review and meta-analysis. *Am J Emerg Med* 2019;37(9):1657-64. doi: 10.1016/j.ajem.2018.11.040  
25 [published Online First: 2018/12/14]  
26  
27  
28  
29 13. Rochweg B, Oczkowski SJ, Siemieniuk RAC, et al. Corticosteroids in Sepsis: An Updated Systematic Review  
30 and Meta-Analysis. *Critical care medicine* 2018;46(9):1411-20. doi: 10.1097/ccm.0000000000003262  
31 [published Online First: 2018/07/07]  
32  
33  
34  
35  
36 14. Rygard SL, Butler E, Granholm A, et al. Low-dose corticosteroids for adult patients with septic shock: a  
37 systematic review with meta-analysis and trial sequential analysis. *Intensive care medicine* 2018;44(7):1003-16.  
38 doi: 10.1007/s00134-018-5197-6 [published Online First: 2018/05/16]  
39  
40  
41  
42  
43 15. Zhou X, Hu C, Yao L, et al. Effect of adjunctive corticosteroids on clinical outcomes in adult patients with  
44 septic shock - a meta-analysis of randomized controlled trials and trial sequential analysis. *J Crit Care*  
45 2018;48:296-306. doi: 10.1016/j.jcrc.2018.09.013 [published Online First: 2018/10/01]  
46  
47  
48  
49 16. Lamontagne F, Quiroz Martinez H, Adhikari NK, et al. Corticosteroid use in the intensive care unit: a survey  
50 of intensivists. *Can J Anaesth* 2013;60(7):652-9. doi: 10.1007/s12630-013-9929-3 [published Online First:  
51 2013/04/23]  
52  
53  
54  
55  
56 17. Shamseer L, Moher D, Clarke M, et al. Preferred reporting items for systematic review and meta-analysis  
57 protocols (PRISMA-P) 2015: elaboration and explanation. *BMJ : British Medical Journal* 2015;349  
58  
59  
60

- 1  
2  
3 18. Stewart LA, Clarke M, Rovers M, et al. Preferred Reporting Items for Systematic Review and Meta-Analyses  
4 of individual participant data: the PRISMA-IPD Statement. *Jama* 2015;313(16):1657-65. doi:  
5  
6 10.1001/jama.2015.3656 [published Online First: 2015/04/29]  
7  
8  
9 19. Higgins JP, Altman DG, Gotzsche PC, et al. The Cochrane Collaboration's tool for assessing risk of bias in  
10 randomised trials. *BMJ (Clinical research ed)* 2011;343:d5928. doi: 10.1136/bmj.d5928 [published Online First:  
11 2011/10/20]  
12  
13  
14 20. Guyatt G, Oxman AD, Sultan S, et al. GRADE guidelines: 11. Making an overall rating of confidence in effect  
15 estimates for a single outcome and for all outcomes. *Journal of clinical epidemiology* 2013;66(2):151-7. doi:  
16 10.1016/j.jclinepi.2012.01.006 [published Online First: 2012/05/01]  
17  
18  
19 21. Kontopantelis E. A comparison of one-stage vs two-stage individual patient data meta-analysis methods: A  
20 simulation study. *Res Synth Methods* 2018;9(3):417-30. doi: 10.1002/jrsm.1303 [published Online First:  
21 2018/05/23]  
22  
23 22. Mathew T, Nordstrom K. Comparison of one-step and two-step meta-analysis models using individual  
24 patient data. *Biom J* 2010;52(2):271-87. doi: 10.1002/bimj.200900143 [published Online First: 2010/03/30]  
25  
26  
27 23. Debray TP, Koffijberg H, Nieboer D, et al. Meta-analysis and aggregation of multiple published prediction  
28 models. *Statistics in medicine* 2014;33(14):2341-62. doi: 10.1002/sim.6080 [published Online First: 2014/04/23]  
29  
30  
31 24. Fine JP, Gray RJ. A Proportional Hazards Model for the Subdistribution of a Competing Risk. *Journal of the*  
32 *American Statistical Association* 1999;94(446):496-509. doi: 10.1080/01621459.1999.10474144  
33  
34  
35 25. Katsahian S, Resche-Rigon M, Chevret S, et al. Analysing multicentre competing risks data with a mixed  
36 proportional hazards model for the subdistribution. *Statistics in medicine* 2006;25(24):4267-78. doi:  
37 10.1002/sim.2684 [published Online First: 2006/09/09]  
38  
39  
40 26. Rothman KJ. No adjustments are needed for multiple comparisons. *Epidemiology* 1990; 1: 43-46  
41  
42  
43 27. Perneger TV. What's wrong with Bonferroni adjustments. *BMJ* 1998; 315: 1236-1238  
44  
45  
46 28. Feise RJ. Do multiple outcome measures require p-value adjustment?. *BMC Med Res Methodol* 2002; 2: 8  
47  
48  
49 29. van der Laan MJ, Rose S. Targetted Learning. Causal inference for observational and experimental data.  
50 New York: Springer 2011.  
51  
52  
53  
54  
55  
56  
57  
58  
59  
60

- 1  
2  
3 30. Debray TP, Schuit E, Efthimiou O, et al. An overview of methods for network meta-analysis using individual  
4 participant data: when do benefits arise? *Stat Methods Med Res* 2018;27(5):1351-64. doi:  
5  
6 10.1177/0962280216660741 [published Online First: 2016/08/05]  
7  
8  
9 31. Gail M, Simon R. Testing for qualitative interactions between treatment effects and patient subsets.  
10  
11 *Biometrics* 1985;41(2):361-72. [published Online First: 1985/06/01]  
12  
13  
14 32. Ahmed I, Sutton AJ, Riley RD. Assessment of publication bias, selection bias, and unavailable data in meta-  
15 analyses using individual participant data: a database survey. *BMJ (Clinical research ed)* 2012;344:d7762. doi:  
16  
17 10.1136/bmj.d7762 [published Online First: 2012/01/05]  
18  
19  
20 33. Riley RD, Lambert PC, Staessen JA, et al. Meta-analysis of continuous outcomes combining individual  
21 patient data and aggregate data. *Statistics in medicine* 2008;27(11):1870-93. doi: 10.1002/sim.3165 [published  
22  
23 Online First: 2007/12/12]  
24  
25  
26 34. Riley RD, Simmonds MC, Look MP. Evidence synthesis combining individual patient data and aggregate  
27 data: a systematic review identified current practice and possible methods. *Journal of clinical epidemiology*  
28  
29 2007;60(5):431-9. doi: 10.1016/j.jclinepi.2006.09.009 [published Online First: 2007/04/11]  
30  
31  
32 35. Guyatt G, Oxman AD, Akl EA, et al. GRADE guidelines: 1. Introduction-GRADE evidence profiles and  
33 summary of findings tables. *Journal of clinical epidemiology* 2011;64(4):383-94. doi:  
34  
35 10.1016/j.jclinepi.2010.04.026 [published Online First: 2011/01/05]  
36  
37  
38 36. Guyatt GH, Oxman AD, Vist GE, et al. GRADE: an emerging consensus on rating quality of evidence and  
39 strength of recommendations. *BMJ (Clinical research ed)* 2008;336(7650):924-6. doi:  
40  
41 10.1136/bmj.39489.470347.AD [published Online First: 2008/04/26]  
42  
43  
44 37. Australian Sepsis Network Management Committee. Australian Sepsis Network [Available from:  
45  
46 [www.australiansepsisnetwork.net.au](http://www.australiansepsisnetwork.net.au) accessed 8th May 2020.  
47  
48  
49  
50 38. International Committee of Medical Journal Editors. Recommendations for the Conduct, Reporting, Editing  
51 and Publication of Scholarly Work in Medical Journals 2019 [Available from: [http://www.icmje.org/icmje-](http://www.icmje.org/icmje-recommendations.pdf)  
52  
53 [recommendations.pdf](http://www.icmje.org/icmje-recommendations.pdf) accessed 8th May, 2020 2020.  
54  
55  
56  
57  
58  
59  
60



- 1  
2  
3 39. Stewart LA, Parmar MKB. Meta-analysis of the literature or of individual patient data: is there a difference?  
4  
5 *The Lancet* 1993;341(8842):418-22. doi: [https://doi.org/10.1016/0140-6736\(93\)93004-K](https://doi.org/10.1016/0140-6736(93)93004-K)  
6  
7  
8 40. Vale CL, Ryzewska LH, Rovers MM, et al. Uptake of systematic reviews and meta-analyses based on  
9  
10 individual participant data in clinical practice guidelines: descriptive study. *BMJ (Clinical research ed)*  
11  
12 2015;350:h1088. doi: 10.1136/bmj.h1088 [published Online First: 2015/03/10]  
13  
14 41. Moore KL, van der Laan MJ. Covariate adjustment in randomized trials with binary outcomes: targeted  
15  
16 maximum likelihood estimation. *Statistics in medicine* 2009;28(1):39-64. doi: 10.1002/sim.3445 [published  
17  
18 Online First: 2008/11/06]  
19  
20  
21 42. van der Laan MJ, Polley EC, Hubbard AE. Super learner. *Stat Appl Genet Mol Biol* 2007;6:Article25. doi:  
22  
23 10.2202/1544-6115.1309 [published Online First: 2007/10/04]  
24  
25  
26  
27  
28  
29  
30  
31  
32  
33  
34  
35  
36  
37  
38  
39  
40  
41  
42  
43  
44  
45  
46  
47  
48  
49  
50  
51  
52  
53  
54  
55  
56  
57  
58  
59  
60

1  
2  
3 The **Utility of Steroids in Septic Shock individual Patient Data Meta-Analysis (ULYSSES**  
4 **IPDMA) Collaborators**  
5  
6  
7

- 8  
9 - Djillali Annane: Department of Critical Care; Raymond Poincaré Hospital (AP-HP)  
10  
11 Laboratory Infection & Inflammation, U1173, Faculty of Health Science Simone Veil,  
12  
13 University of Versailles SQY- University Paris Saclay – INSERM- FHU SEPSIS; RHU  
14  
15 RECORDS, France  
16  
17  
18 - Yaseen Arabi: Intensive Care Department; Medical Director, Respiratory Services  
19  
20 Professor, College of Medicine King Saud Bin Abdulaziz University for Health  
21  
22 Sciences King Abdulaziz Medical City; Saudi Arabia  
23  
24  
25 - Laurent Billot: The George Institute for Global Health, Faculty of Medicine, University  
26  
27 of New South Wales, Sydney, Australia  
28  
29  
30 - Pierre Edouard Bollaert: Service de Médecine Intensive Réanimation, CHRU de  
31  
32 Nancy, Hôpital Central, 54035 Nancy Cedex, France  
33  
34  
35 - Josef Briegel : Ludwig-Maximilians-Universität München Klinik für Anaesthesiologie  
36  
37 Marchioninstr. München ; Germany  
38  
39  
40 - Sylvie Chevret: Department of Bioinformatics and Statistics, hôpital Saint Louis (AP-  
41  
42 HP), University of Paris, Paris, France  
43  
44  
45 - Jeremy Cohen: The George Institute for Global Health, Sydney. Royal Brisbane and  
46  
47 Women’s Hospital, University of Queensland, Brisbane. The Wesley Hospital, Brisbane.  
48  
49 The University of Queensland  
50  
51  
52 - Anthony Delaney: Division of Critical Care, The George Institute for Global Health,  
53  
54 University of New South Wales, Newtown, Sydney, NSW. Malcolm Fisher Department  
55  
56 of Intensive Care Medicine, Royal North Shore Hospital, St. Leonards, NSW, Australia  
57  
58  
59  
60

- 1  
2  
3 - Naomi Hammond: Division of Critical Care, The George Institute for Global Health,  
4 University of New South Wales, Newtown, Sydney, NSW. Malcolm Fisher Department  
5 of Intensive Care Medicine, Royal North Shore Hospital, St. Leonards, NSW, Australia  
6  
7  
8  
9  
10 - Didier Keh: Oberarzt Klinik für Anästhesiologie m.S. operative Intensivmedizin CCM/CVK  
11 Canpus Virchow-Klinikum  
12  
13  
14  
15 Berlin; Germany  
16  
17 - Simon Finfer: Division of Critical Care, The George Institute for Global Health,  
18 University of New South Wales, Newtown, Sydney, NSW. Malcolm Fisher Department  
19 of Intensive Care Medicine, Royal North Shore Hospital, St. Leonards, NSW, Australia  
20  
21  
22  
23  
24 - Anthony Gordon: Division of Anaesthetics, Pain Medicine and Intensive Care,  
25 Imperial College London, London UK  
26  
27  
28  
29 - Ling Liu: Department of critical Medicine, Zhong-Da Hospital and school of clinical  
30 Medine, Southeast University, Nanjing 210009, China.  
31  
32  
33  
34 - Umberto G. Meduri: University of Tennessee Health Science Center and Memphis VA  
35 Medical Center, Memphis TN, USA  
36  
37  
38  
39 - Liliana Mirea: Anaesthesia and Intensive Care, Clinical Emergency Hospital of  
40 Bucharest, 2ENT, Elias Clinical Emergency Hospital, Endocrinology, National,  
41 Bucharest, Romania  
42  
43  
44  
45  
46 - John Myburgh: Division of Critical Care, The George Institute for Global Health,  
47 University of New South Wales, Newtown, Sydney, NSW. University of New South  
48 Wales, St. George Clinical School, Sydney, NSW, Australia  
49  
50  
51  
52  
53 - Romain Pirracchio: Department of Anesthesia and Perioperative Medicine; Zuckerberg  
54 San Francisco General Hospital and Trauma Center; University of California San  
55 Francisco, USA  
56  
57  
58  
59  
60

- 1  
2  
3 - Charles L. Sprung: Department of Anesthesiology, Critical Care Medicine and Pain,  
4 Hadassah Hebrew University Medical Center, Jerusalem, Israel  
5  
6  
7  
8 - Nejla Tilouche : Intensive Care Unit, University Hospital Taher Sfar Mahdia 5100,;  
9  
10 University of Monastir, Research Laboratory, Tunisia  
11  
12  
13 - Surat Tongyoo: Faculty of Medicine, Siriraj Hospital, Mahidol University, No. 2,  
14 Prannok Road, Bangkoknoi, Bangkok, 10700, Thailand. [surat\\_ty@yahoo.co.uk](mailto:surat_ty@yahoo.co.uk).  
15  
16  
17 - Balasubramanian Venkatesh: Division of Critical Care, The George Institute for Global  
18 Health, University of New South Wales, Newtown, Sydney, NSW, Australia; The  
19 Princess Alexandra Hospital, Brisbane, Queensland, Australia  
20  
21  
22  
23 - Andre Waschka: Department of Statistics; Zuckerberg San Francisco General Hospital  
24 and Trauma Center; University of California San Francisco, USA  
25  
26  
27  
28  
29 - Ruiqiang Zheng: Department of Critical Care Medicine, the Northern Jiangsu People's  
30 Hospital, Yangzhou 225001, Jiangsu, China.  
31  
32  
33  
34  
35  
36  
37  
38  
39  
40  
41  
42  
43  
44  
45  
46  
47  
48  
49  
50  
51  
52  
53  
54  
55  
56  
57  
58  
59  
60

## Appendix 1: Search strategy

### 1 Search strategy for CENTRAL

#1 MeSH descriptor: [Sepsis] explode all trees

#2 MeSH descriptor: [Shock, Septic] explode all trees

#3 MeSH descriptor: [Systemic Inflammatory Response Syndrome] explode all trees

#4 MeSH descriptor: [Central Nervous System Bacterial Infections] explode all trees and with qualifier(s): [blood - BL, complications - CO, drug therapy - DT]

#5 MeSH descriptor: [Pneumonia] explode all trees

#6 MeSH descriptor: [Community-Acquired Infections] explode all trees and with qualifier(s): [complications - CO, drug therapy - DT]

#7 MeSH descriptor: [Respiratory Distress Syndrome, Adult] explode all trees and with qualifier(s): [complications - CO, drug therapy - DT]

#8 MeSH descriptor: [Acute Lung Injury] explode all trees and with qualifier(s): [complications - CO, drug therapy - DT]

#9 sepsis or (septic\* NEAR/3 shock\*)

#10 (bacterem\* or bacteraem\* or pyrexia or septicaem\* or septicem\*)

#11 SIRS or (Inflammatory next Response next Syndrome\*)

#12 bacteria\* NEAR infect\* NEAR (blood\* or serum or invas\* or severe or systemic)

#13 ((community next acquired) or severe) NEAR pneumonia

#14 (acute or adult) NEAR/2 (respiratory NEAR/2 distress)

#15 (acute or adult) NEAR/2 (lung NEAR/2 injury)

#16 ARDS

#17 #1 or #2 or #3 or #4 or #5 or #6 or #7 or #8 or #9 or #10 or #11 or #12 or #13 or #14 or #15 or #16

#18 MeSH descriptor: [Adrenal Cortex Hormones] explode all trees

#19 MeSH descriptor: [Hydrocortisone] explode all trees

#20 MeSH descriptor: [Cortisone] explode all trees

1  
2  
3 #21 MeSH descriptor: [Steroids] explode all trees  
4

5 #22 corticosteroid\* or steroid\* or cortison\* or hydrocortison\*  
6

7 #23 methylprednisolon\* or (methyl next prednisolon\*) or betamethason\* or dexamethason\*  
8 or glucocorticoid\* or fludrocortison\* or mineralocorticoid\*  
9

10  
11 #24 #18 or #19 or #20 or #21 or #22 or #23  
12

13 #25 #17 and #24  
14

15 #26 #25 in Trials  
16  
17

## 18 19 **2 Search strategy for MEDLINE (Ovid SP)** 20

21 1 exp Sepsis/  
22

23 2 exp Shock, Septic/  
24

25 3 Systemic Inflammatory Response Syndrome/  
26

27 4 exp Bacteremia/  
28

29 5 Bacterial Infections/bl, dt, co  
30

31 6 Pneumonia/co, dt  
32

33 7 Community-Acquired Infections/co, dt  
34

35 8 Respiratory Distress Syndrome, Adult/co, dt  
36

37 9 Acute Lung Injury/co, dt  
38

39 10 (sepsis or septic\*).mp.  
40

41 11 (bacter?em\* or septic?em\* or pyrexia).mp.  
42

43 12 (SIRS or Inflammatory Response Syndrome\*).mp.  
44

45 13 (bacteria\* adj6 infect\* adj6 (blood\* or serum or invas\* or severe or systemic)).mp.  
46

47 14 ((community-acquired or severe) adj3 pneumonia).mp.  
48

49 15 ((acute or adult) adj2 (respiratory adj2 distress)).mp.  
50

51 16 ARDS.mp.  
52

53 17 ((acute or adult) adj2 (lung adj2 injury)).mp.  
54  
55  
56  
57  
58  
59  
60

1  
2  
3 18 1 or 2 or 3 or 4 or 5 or 6 or 7 or 8 or 9 or 10 or 11 or 12 or 13 or 14 or 15 or 16 or 17  
4

5 19 exp Adrenal Cortex Hormones/  
6

7 20 exp Hydrocortisone/  
8

9 21 (corticosteroid\* or steroid\* or cortison\* or hydrocortison\*).mp.  
10

11 22 (methylprednisolon\* or betamethason\* or dexamethason\* or glucocorticoid\* or  
12 fludrocortison\* or mineralocorticoid\*).mp.  
13

14 23 19 or 20 or 21 or 22  
15

16 24 18 and 23  
17

18 25 ((randomized controlled trial or controlled clinical trial).pt. or randomi?ed.ab. or  
19 placebo.ab. or clinical trials as topic.sh. or randomly.ab. or trial.ti.) not (animals not (humans  
20 and animals)).sh.  
21

22 26 24 and 25  
23  
24  
25  
26  
27

### 28 **3 Search strategy for Embase (Ovid SP)**

29 1 exp sepsis/  
30

31 2 exp septic shock/  
32

33 3 pneumonia/co, dt [Complication, Drug Therapy]  
34

35 4 adult respiratory distress syndrome/co, dt [Complication, Drug Therapy]  
36

37 5 acute lung injury/co, dt [Complication, Drug Therapy]  
38

39 6 systemic inflammatory response syndrome/co, dt [Complication, Drug Therapy]  
40

41 7 community acquired infection/co, dt [Complication, Drug Therapy]  
42

43 8 (sepsis or (septic\* adj5 shock) or (bacter?em\* or pyrexia or septic?em\*) or (SIRS or  
44 Inflammatory Response Syndrome\*).mp.  
45

46 9 (bacteria\* adj2 infect\* adj2 (blood\* or serum or invas\* or severe or systemic)).mp.  
47

48 10 (((community-acquired or severe) adj2 pneumonia) or ((acute or adult) adj1 (respiratory  
49 adj1 distress)) or ((acute or adult) adj1 (lung adj1 injury)) or ARDS).mp.  
50

51 11 1 or 2 or 3 or 4 or 5 or 6 or 7 or 8 or 9 or 10  
52

53 12 steroid/  
54  
55  
56  
57  
58  
59  
60

1  
2  
3 13 corticosteroid/  
4

5 14 cortisone/  
6

7 15 hydrocortisone/  
8

9  
10 16 (corticosteroid\* or steroid\* or cortison\* or hydrocortison\* or (methylprednisolon\* or  
11 methyl prednisolon\* or betamethason\* or dexamethason\* or glucocorticoid\* or  
12 fludrocortison\* or mineralocorticoid\*)).mp.  
13

14  
15 17 12 or 13 or 14 or 15 or 16  
16

17 18 11 and 17  
18

19 19 ((placebo or randomized controlled trial).sh. or controlled study.ab. or random\*.ti,ab. or  
20 trial\*.ti,ab.) not (animal not human).sh.  
21

22  
23 20 18 and 19  
24

25  
26 **4 Search strategy for LILACS (via BIREME)**  
27

28 (sepsis OR septic\$ OR SEPSIS OR SEPTIC OR SIRS OR "septic shock" OR "SEPTIC  
29 SHOCK/" OR SEPTICEMIA OR PNEUMONIA OR bact\* OR "adult respiratory distress  
30 syndrome" OR "acute lung injury" OR "systemic inflammatory response syndrome" OR  
31 "bacterial infection" OR "community acquired infection" ) (corticosteroid\* OR steroid\* OR  
32 glucocorticoid\* OR CORTCOSTEROID\* OR GLUCOCORTICOID/ OR STEROID OR  
33 MINERALOCORTICOID OR cortison\* OR hydrocortison\* OR fludrocortison\* OR  
34 betamethason\* OR methylprednisolon\* OR prednison\* OR dexamethason\*)  
35  
36  
37  
38  
39  
40  
41  
42  
43  
44  
45  
46  
47  
48  
49  
50  
51  
52  
53  
54  
55  
56  
57  
58  
59  
60



**PRISMA-P (Preferred Reporting Items for Systematic review and Meta-Analysis Protocols) 2015 checklist: recommended items to address in a systematic review protocol\***

| Section and topic                 | Item No | Checklist item                                                                                                                                                                                                         | Reported on page |
|-----------------------------------|---------|------------------------------------------------------------------------------------------------------------------------------------------------------------------------------------------------------------------------|------------------|
| <b>ADMINISTRATIVE INFORMATION</b> |         |                                                                                                                                                                                                                        |                  |
| Title:                            |         |                                                                                                                                                                                                                        |                  |
| Identification                    | 1a      | Identify the report as a protocol of a systematic review                                                                                                                                                               | 1                |
| Update                            | 1b      | If the protocol is for an update of a previous systematic review, identify as such                                                                                                                                     |                  |
| Registration                      | 2       | If registered, provide the name of the registry (such as PROSPERO) and registration number                                                                                                                             | 1                |
| Authors:                          |         |                                                                                                                                                                                                                        |                  |
| Contact                           | 3a      | Provide name, institutional affiliation, e-mail address of all protocol authors; provide physical mailing address of corresponding author                                                                              | 1                |
| Contributions                     | 3b      | Describe contributions of protocol authors and identify the guarantor of the review                                                                                                                                    | 2                |
| Amendments                        | 4       | If the protocol represents an amendment of a previously completed or published protocol, identify as such and list changes; otherwise, state plan for documenting important protocol amendments                        | 3                |
| Support:                          |         |                                                                                                                                                                                                                        |                  |
| Sources                           | 5a      | Indicate sources of financial or other support for the review                                                                                                                                                          | 3                |
| Sponsor                           | 5b      | Provide name for the review funder and/or sponsor                                                                                                                                                                      | 3                |
| Role of sponsor or funder         | 5c      | Describe roles of funder(s), sponsor(s), and/or institution(s), if any, in developing the protocol                                                                                                                     | 3                |
| <b>INTRODUCTION</b>               |         |                                                                                                                                                                                                                        |                  |
| Rationale                         | 6       | Describe the rationale for the review in the context of what is already known                                                                                                                                          | 7                |
| Objectives                        | 7       | Provide an explicit statement of the question(s) the review will address with reference to participants, interventions, comparators, and outcomes (PICO)                                                               | 8                |
| <b>METHODS</b>                    |         |                                                                                                                                                                                                                        |                  |
| Eligibility criteria              | 8       | Specify the study characteristics (such as PICO, study design, setting, time frame) and report characteristics (such as years considered, language, publication status) to be used as criteria for eligibility for the | 9,10             |

| review                             |     |                                                                                                                                                                                                                                                  |                |
|------------------------------------|-----|--------------------------------------------------------------------------------------------------------------------------------------------------------------------------------------------------------------------------------------------------|----------------|
| Information sources                | 9   | Describe all intended information sources (such as electronic databases, contact with study authors, trial registers or other grey literature sources) with planned dates of coverage                                                            | 11             |
| Search strategy                    | 10  | Present draft of search strategy to be used for at least one electronic database, including planned limits, such that it could be repeated                                                                                                       | 11, appendix 2 |
| Study records:                     |     |                                                                                                                                                                                                                                                  |                |
| Data management                    | 11a | Describe the mechanism(s) that will be used to manage records and data throughout the review                                                                                                                                                     | 11,12          |
| Selection process                  | 11b | State the process that will be used for selecting studies (such as two independent reviewers) through each phase of the review (that is, screening, eligibility and inclusion in meta-analysis)                                                  | 11             |
| Data collection process            | 11c | Describe planned method of extracting data from reports (such as piloting forms, done independently, in duplicate), any processes for obtaining and confirming data from investigators                                                           | 12             |
| Data items                         | 12  | List and define all variables for which data will be sought (such as PICO items, funding sources), any pre-planned data assumptions and simplifications                                                                                          | 12,13          |
| Outcomes and prioritization        | 13  | List and define all outcomes for which data will be sought, including prioritization of main and additional outcomes, with rationale                                                                                                             | 13,14          |
| Risk of bias in individual studies | 14  | Describe anticipated methods for assessing risk of bias of individual studies, including whether this will be done at the outcome or study level, or both; state how this information will be used in data synthesis                             | 14             |
| Data synthesis                     | 15a | Describe criteria under which study data will be quantitatively synthesised                                                                                                                                                                      | 14             |
|                                    | 15b | If data are appropriate for quantitative synthesis, describe planned summary measures, methods of handling data and methods of combining data from studies, including any planned exploration of consistency (such as $I^2$ , Kendall's $\tau$ ) | 14,15          |
|                                    | 15c | Describe any proposed additional analyses (such as sensitivity or subgroup analyses, meta-regression)                                                                                                                                            | 15,16          |
|                                    | 15d | If quantitative synthesis is not appropriate, describe the type of summary planned                                                                                                                                                               |                |
| Meta-bias(es)                      | 16  | Specify any planned assessment of meta-bias(es) (such as publication bias across studies, selective reporting within studies)                                                                                                                    | 17             |

1  
2  
3  
4  
5  
6  
7  
8  
9  
10  
11  
12  
13  
14  
15  
16  
17  
18  
19  
20  
21  
22  
23  
24  
25  
26  
27  
28  
29  
30  
31  
32  
33  
34  
35  
36  
37  
38  
39  
40  
41  
42  
43  
44  
45  
46  
47  
48  
49  
50  
51  
52  
53  
54  
55  
56  
57  
58  
59  
60

---

|                                         |    |                                                                                       |    |
|-----------------------------------------|----|---------------------------------------------------------------------------------------|----|
| Confidence<br>in cumulative<br>evidence | 17 | Describe how the strength of the body of<br>evidence will be assessed (such as GRADE) | 17 |
|-----------------------------------------|----|---------------------------------------------------------------------------------------|----|

---

For peer review only
